# Supplementary material for: Lineage-specific elaboration of a conserved cnidogenic program drives cnidocyte diversification and illuminates cell type evolution
Source: Research Square preprint supplement (doi:10.21203/rs.3.rs-10009230/v1), 2026-06-30
Supplement: Supplementary file 1 [file 052534ecf9cc3eeca50d0f23.xlsx]

## Sheet: znf845
Nv_protein_ID	Nv_cnidocyte_expr(>0.3)	Nv_cnidocyte_marker_gene	Sp_ortholog	Sp_ortholog_cnidocyte_expr(>0.3)	Sp_ortholog_cnidocyte_marker_gene	Xe_ortholog	Xe_ortholog_cnidocyte_expr(>0.3)	Xe_ortholog_cnidocyte_marker_gene	Hv_ortholog	Hv_ortholog_cnidocyte_expr(>0.3)	Hv_ortholog_cnidocyte_marker_gene
NV2g000118000.1	TRUE	TRUE	Spis_XP_022779796_1			Xesp_000539	Xesp-000539	Xesp-000539	Hvul_g3384_1	Hvul-g3384-1	Hvul-g3384-1
NV2g000131000.1	TRUE	TRUE	Spis_XP_022795206_1
NV2g000160000.1	TRUE	TRUE
NV2g000273000.1	TRUE	TRUE	Spis_XP_022802305_1	Spis-XP-022802305-1		Xesp_004048	Xesp-004048	Xesp-004048	Hvul_g9629_1	Hvul-g9629-1	Hvul-g9629-1
NV2g000295000.1	TRUE	TRUE	Spis_XP_022786621_1	Spis-XP-022786621-1		Xesp_001183	Xesp-001183	Xesp-001183	Hvul_g24823_1	Hvul-g24823-1	Hvul-g24823-1						Orthologs	exp. Cnidocytes
NV2g000363000.1	TRUE	TRUE														Stylophora	432	253
NV2g000372000.1	TRUE	FALSE														Xenia	275	264
NV2g000381000.1	TRUE	TRUE														Hydra vulgaris	263	250
NV2g000667000.1	TRUE	TRUE	Spis_XP_022787068_1						Hvul_g3316_1	Hvul-g3316-1	Hvul-g3316-1
NV2g000737000.1	TRUE	TRUE	Spis_XP_022801159_1,Spis_XP_022801157_1
NV2g000738000.1	TRUE	TRUE	Spis_XP_022801159_1,Spis_XP_022801157_1
NV2g000767000.1	TRUE	TRUE	Spis_XP_022805590_1	Spis-XP-022805590-1	Spis-XP-022805590-1				Hvul_g14279_1,Hvul_g14280_1	Hvul-g14279-1,Hvul-g14280-1	Hvul-g14279-1,Hvul-g14280-1
NV2g000919000.1	TRUE	TRUE	Spis_XP_022802009_1	Spis-XP-022802009-1		Xesp_003236	Xesp-003236	Xesp-003236	Hvul_g25284_1	Hvul-g25284-1	Hvul-g25284-1
NV2g000920000.1	TRUE	TRUE	Spis_XP_022802013_1
NV2g000922000.1	TRUE	TRUE	Spis_XP_022802025_1						Hvul_g11295_1	Hvul-g11295-1	Hvul-g11295-1
NV2g000930000.1	TRUE	TRUE	Spis_XP_022799753_1	Spis-XP-022799753-1	Spis-XP-022799753-1
NV2g000931000.1	TRUE	TRUE	Spis_XP_022799755_1	Spis-XP-022799755-1
NV2g000932000.1	TRUE	TRUE	Spis_XP_022799772_1	Spis-XP-022799772-1		Xesp_000684	Xesp-000684		Hvul_g31726_1	Hvul-g31726-1	Hvul-g31726-1
NV2g000950000.1	TRUE	TRUE
NV2g000951000.1	TRUE	TRUE
NV2g000974000.1	TRUE	TRUE
NV2g000975000.1	TRUE	TRUE	Spis_XP_022800625_1,Spis21631_1			Xesp_017484,Xesp_023277	Xesp-017484		Hvul_g11902_1
NV2g001045000.1	TRUE	TRUE	Spis_XP_022779009_1,Spis_XP_022779072_1,Spis_XP_022780676_1,Spis_XP_022796665_1	Spis-XP-022779009-1,Spis-XP-022796665-1	Spis-XP-022796665-1
NV2g001046000.1	TRUE	TRUE	Spis_XP_022779011_1
NV2g001047000.1	TRUE	TRUE	Spis_XP_022798877_1
NV2g001056000.1	TRUE	TRUE
NV2g001122000.1	TRUE	TRUE	Spis_XP_022786599_1	Spis-XP-022786599-1
NV2g001169000.1	TRUE	TRUE	Spis_XP_022802311_1	Spis-XP-022802311-1		Xesp_004316	Xesp-004316	Xesp-004316	Hvul_g2548_1	Hvul-g2548-1
NV2g001170000.1	TRUE	TRUE	Spis_XP_022802321_1	Spis-XP-022802321-1		Xesp_004317	Xesp-004317	Xesp-004317
NV2g001255000.1	TRUE	TRUE
NV2g001302000.1	TRUE	TRUE	Spis_XP_022791487_1			Xesp_004253	Xesp-004253		Hvul_g30459_1	Hvul-g30459-1	Hvul-g30459-1
NV2g001333000.1	TRUE	FALSE
NV2g001356000.1	TRUE	TRUE	Spis_XP_022787436_1,Spis_XP_022792487_1,Spis_XP_022792463_1,Spis_XP_022792465_1,Spis_XP_022792480_1	Spis-XP-022787436-1,Spis-XP-022792487-1					Hvul_g15705_1,Hvul_g18795_1,Hvul_g27055_1,Hvul_g22625_1,Hvul_g22764_1	Hvul-g18795-1,Hvul-g22625-1,Hvul-g22764-1
NV2g001389000.1	TRUE	TRUE	Spis_XP_022805096_1			Xesp_003258	Xesp-003258		Hvul_g11136_1	Hvul-g11136-1
NV2g001407000.1	TRUE	TRUE	Spis_XP_022793293_1
NV2g001477000.1	TRUE	TRUE	Spis_XP_022782179_1
NV2g001572000.1	TRUE	FALSE	Spis_XP_022782441_1,Spis17757_1,Spis611_1,Spis6210_1
NV2g001605000.1	TRUE	TRUE	Spis_XP_022783181_1			Xesp_012148,Xesp_012150	Xesp-012148,Xesp-012150	Xesp-012150
NV2g001823000.1	TRUE	TRUE	Spis_XP_022787585_1
NV2g001851000.1	TRUE	TRUE
NV2g001889000.1	TRUE	TRUE	Spis_XP_022788199_1	Spis-XP-022788199-1		Xesp_005302	Xesp-005302	Xesp-005302	Hvul_g21278_1,Hvul_g20528_1,Hvul_g21265_1	Hvul-g21278-1,Hvul-g21265-1	Hvul-g21265-1
NV2g002081000.1	TRUE	TRUE
NV2g002239000.1	TRUE	TRUE
NV2g002309000.1	TRUE	TRUE	Spis_XP_022783462_1	Spis-XP-022783462-1					Hvul_g19213_1,Hvul_g3353_1	Hvul-g19213-1,Hvul-g3353-1
NV2g002581000.1	TRUE	TRUE	Spis_XP_022787362_1			Xesp_015965	Xesp-015965		Hvul_g18993_1,Hvul_g3462_1,Hvul_g6042_1,Hvul_g6045_1	Hvul-g18993-1,Hvul-g3462-1,Hvul-g6045-1
NV2g002621000.1	TRUE	TRUE
NV2g002625000.1	TRUE	TRUE
NV2g002628000.1	TRUE	TRUE
NV2g002644000.1	TRUE	TRUE	Spis_XP_022795386_1,Spis_XP_022795389_1,Spis_XP_022799709_1,Spis_XP_022799714_1,Spis_XP_022806751_1,Spis_XP_022790889_1	Spis-XP-022795386-1,Spis-XP-022799714-1
NV2g002652000.1	TRUE	TRUE	Spis_XP_022801271_1			Xesp_015653,Xesp_025421	Xesp-015653,Xesp-025421	Xesp-025421,Xesp-015653	Hvul_g20918_1	Hvul-g20918-1	Hvul-g20918-1
NV2g002698000.1	TRUE	FALSE	Spis21759_1,Spis_XP_022780825_1			Xesp_002673,Xesp_002744	Xesp-002673,Xesp-002744
NV2g002702000.1	TRUE	FALSE	Spis_XP_022803969_1						Hvul_g5990_1	Hvul-g5990-1
NV2g002739000.1	TRUE	TRUE	Spis_XP_022786342_1,Spis_XP_022786347_1,Spis_XP_022786324_1	Spis-XP-022786342-1		Xesp_002536	Xesp-002536	Xesp-002536	Hvul_g18301_1,Hvul_g30850_1,Hvul_g30851_1	Hvul-g18301-1
NV2g002966000.1	TRUE	TRUE	Spis_XP_022781105_1	Spis-XP-022781105-1		Xesp_014082	Xesp-014082	Xesp-014082	Hvul_g9045_1	Hvul-g9045-1
NV2g002968000.1	TRUE	TRUE
NV2g003092000.1	TRUE	TRUE	Spis_XP_022787988_1	Spis-XP-022787988-1
NV2g003098000.1	TRUE	TRUE	Spis_XP_022787941_1	Spis-XP-022787941-1	Spis-XP-022787941-1	Xesp_015995	Xesp-015995	Xesp-015995	Hvul_g4913_1	Hvul-g4913-1	Hvul-g4913-1
NV2g003099000.1	TRUE	TRUE	Spis_XP_022787985_1	Spis-XP-022787985-1	Spis-XP-022787985-1				Hvul_g15988_1	Hvul-g15988-1	Hvul-g15988-1
NV2g003111000.1	TRUE	TRUE
NV2g003200000.1	TRUE	TRUE				Xesp_022356	Xesp-022356		Hvul_g16070_1	Hvul-g16070-1	Hvul-g16070-1
NV2g003202000.1	TRUE	TRUE	Spis_XP_022801159_1,Spis_XP_022801157_1
NV2g003222000.1	TRUE	FALSE	Spis_XP_022802645_1			Xesp_004045	Xesp-004045		Hvul_g24637_1	Hvul-g24637-1
NV2g003325000.1	TRUE	TRUE
NV2g003330000.1	TRUE	FALSE	Spis_XP_022787992_1
NV2g003442000.1	TRUE	FALSE
NV2g003554000.1	TRUE	TRUE
NV2g003555000.1	TRUE	TRUE	Spis_XP_022808147_1	Spis-XP-022808147-1		Xesp_016020	Xesp-016020	Xesp-016020	Hvul_g12231_1	Hvul-g12231-1	Hvul-g12231-1
NV2g003609000.1	TRUE	TRUE	Spis_XP_022781162_1
NV2g003610000.1	TRUE	TRUE
NV2g003634000.1	TRUE	FALSE
NV2g003674000.1	TRUE	TRUE	Spis_XP_022795626_1,Spis_XP_022793430_1	Spis-XP-022793430-1		Xesp_004950,Xesp_004951	Xesp-004950,Xesp-004951		Hvul_g11466_1,Hvul_g3317_1	Hvul-g11466-1,Hvul-g3317-1	Hvul-g11466-1,Hvul-g3317-1
NV2g003675000.1	TRUE	TRUE
NV2g003697000.1	TRUE	TRUE	Spis_XP_022781181_1
NV2g003783000.1	TRUE	TRUE	Spis_XP_022801297_1	Spis-XP-022801297-1		Xesp_014575	Xesp-014575	Xesp-014575	Hvul_g11287_1	Hvul-g11287-1	Hvul-g11287-1
NV2g003805000.1	TRUE	TRUE
NV2g003818000.1	TRUE	TRUE	Spis_XP_022801330_1	Spis-XP-022801330-1	Spis-XP-022801330-1				Hvul_g863_1	Hvul-g863-1	Hvul-g863-1
NV2g003835000.1	FALSE	FALSE
NV2g004010000.1	TRUE	TRUE
NV2g004066000.1	TRUE	TRUE	Spis_XP_022791088_1	Spis-XP-022791088-1					Hvul_g16204_1	Hvul-g16204-1	Hvul-g16204-1
NV2g004067000.1	TRUE	TRUE				Xesp_007040,Xesp_007041	Xesp-007040,Xesp-007041	Xesp-007040	Hvul_g12703_1	Hvul-g12703-1	Hvul-g12703-1
NV2g004093000.1	TRUE	TRUE	Spis_XP_022804867_1						Hvul_g3105_1,Hvul_g31126_1	Hvul-g31126-1
NV2g004150000.1	TRUE	TRUE	Spis_XP_022780190_1,Spis_XP_022802482_1	Spis-XP-022780190-1,Spis-XP-022802482-1					Hvul_g29767_1	Hvul-g29767-1
NV2g004172000.1	TRUE	TRUE
NV2g004231000.1	TRUE	TRUE	Spis_XP_022781060_1,Spis_XP_022780997_1	Spis-XP-022781060-1,Spis-XP-022780997-1					Hvul_g24015_1	Hvul-g24015-1	Hvul-g24015-1
NV2g004233000.1	TRUE	TRUE	Spis_XP_022781049_1,Spis_XP_022781055_1,Spis_XP_022781061_1	Spis-XP-022781055-1		Xesp_005566	Xesp-005566	Xesp-005566	Hvul_g31726_1	Hvul-g31726-1	Hvul-g31726-1
NV2g004235000.1	TRUE	TRUE	Spis_XP_022781049_1,Spis_XP_022781055_1,Spis_XP_022781061_1	Spis-XP-022781055-1		Xesp_005566	Xesp-005566	Xesp-005566	Hvul_g31726_1	Hvul-g31726-1	Hvul-g31726-1
NV2g004247000.1	TRUE	FALSE	Spis_XP_022799376_1	Spis-XP-022799376-1
NV2g004258000.1	TRUE	TRUE	Spis_XP_022779496_1						Hvul_g7745_1	Hvul-g7745-1	Hvul-g7745-1
NV2g004478000.1	TRUE	TRUE	Spis_XP_022788623_1
NV2g004505000.1	TRUE	TRUE
NV2g004506000.1	TRUE	TRUE	Spis_XP_022799799_1			Xesp_005615	Xesp-005615	Xesp-005615	Hvul_g33793_1	Hvul-g33793-1	Hvul-g33793-1
NV2g004511000.1	TRUE	TRUE	Spis_XP_022793194_1	Spis-XP-022793194-1					Hvul_g26932_1	Hvul-g26932-1	Hvul-g26932-1
NV2g004514000.1	TRUE	TRUE				Xesp_005615	Xesp-005615	Xesp-005615	Hvul_g13980_1,Hvul_g5217_1,Hvul_g5218_1	Hvul-g13980-1,Hvul-g5218-1
NV2g004684000.1	TRUE	TRUE	Spis_XP_022800730_1,Spis_XP_022804314_1			Xesp_006334
NV2g004707000.1	TRUE	TRUE
NV2g004794000.1	TRUE	TRUE	Spis_XP_022791731_1
NV2g004880000.1	TRUE	TRUE
NV2g005100000.1	TRUE	TRUE	Spis_XP_022786709_1	Spis-XP-022786709-1
NV2g005136000.1	TRUE	TRUE	Spis_XP_022781045_1						Hvul_g24015_1	Hvul-g24015-1	Hvul-g24015-1
NV2g005137000.1	TRUE	TRUE	Spis_XP_022791729_1	Spis-XP-022791729-1	Spis-XP-022791729-1	Xesp_005577	Xesp-005577	Xesp-005577	Hvul_g31729_1	Hvul-g31729-1	Hvul-g31729-1
NV2g005138000.1	TRUE	TRUE	Spis_XP_022779601_1,Spis_XP_022779490_1			Xesp_005577	Xesp-005577	Xesp-005577	Hvul_g31729_1	Hvul-g31729-1	Hvul-g31729-1
NV2g005193000.1	TRUE	TRUE
NV2g005195000.1	TRUE	TRUE
NV2g005196000.1	TRUE	TRUE	Spis_XP_022806671_1	Spis-XP-022806671-1	Spis-XP-022806671-1	Xesp_006066	Xesp-006066	Xesp-006066	Hvul_g24012_1	Hvul-g24012-1	Hvul-g24012-1
NV2g005198000.1	TRUE	TRUE
NV2g005199000.1	TRUE	TRUE	Spis_XP_022806671_1	Spis-XP-022806671-1	Spis-XP-022806671-1	Xesp_006066	Xesp-006066	Xesp-006066	Hvul_g24012_1	Hvul-g24012-1	Hvul-g24012-1
NV2g005200000.1	TRUE	TRUE	Spis_XP_022806650_1	Spis-XP-022806650-1	Spis-XP-022806650-1	Xesp_006067	Xesp-006067	Xesp-006067	Hvul_g6452_1	Hvul-g6452-1	Hvul-g6452-1
NV2g005234000.1	TRUE	TRUE	Spis_XP_022786745_1
NV2g005415000.1	TRUE	TRUE	Spis_XP_022806307_1,Spis_XP_022788907_1,Spis_XP_022800937_1			Xesp_021447,Xesp_021457	Xesp-021447	Xesp-021447	Hvul_g22797_1	Hvul-g22797-1	Hvul-g22797-1
NV2g005475000.1	TRUE	FALSE							Hvul_g2585_1	Hvul-g2585-1	Hvul-g2585-1
NV2g005499000.1	TRUE	TRUE	Spis_XP_022788823_1			Xesp_002646	Xesp-002646	Xesp-002646	Hvul_g33507_1	Hvul-g33507-1
NV2g005582000.1	TRUE	TRUE	Spis_XP_022807991_1,Spis_XP_022797351_1	Spis-XP-022807991-1
NV2g005704000.1	TRUE	TRUE							Hvul_g7358_1	Hvul-g7358-1	Hvul-g7358-1
NV2g005705000.1	TRUE	TRUE	Spis_XP_022808313_1	Spis-XP-022808313-1		Xesp_002881	Xesp-002881	Xesp-002881	Hvul_g7358_1	Hvul-g7358-1	Hvul-g7358-1
NV2g005717000.1	TRUE	TRUE	Spis_XP_022807642_1,Spis_XP_022808027_1,Spis_XP_022777496_1,Spis_XP_022777495_1,Spis_XP_022804289_1	Spis-XP-022804289-1		Xesp_004730,Xesp_001142,Xesp_001143,Xesp_001144,Xesp_001145,Xesp_001129,Xesp_001136,Xesp_001130,Xesp_001137,Xesp_001139,Xesp_001133,Xesp_001132,Xesp_001131,Xesp_001138	Xesp-004730,Xesp-001144,Xesp-001129,Xesp-001136,Xesp-001139,Xesp-001131
NV2g005734000.1	TRUE	FALSE
NV2g005910000.1	TRUE	TRUE	Spis_XP_022777855_1	Spis-XP-022777855-1		Xesp_002860	Xesp-002860	Xesp-002860	Hvul_g8165_1	Hvul-g8165-1	Hvul-g8165-1
NV2g005916000.1	TRUE	TRUE	Spis_XP_022777854_1,Spis_XP_022805377_1	Spis-XP-022777854-1,Spis-XP-022805377-1	Spis-XP-022805377-1				Hvul_g22058_1	Hvul-g22058-1	Hvul-g22058-1
NV2g005917000.1	TRUE	TRUE	Spis_XP_022805384_1	Spis-XP-022805384-1		Xesp_002861	Xesp-002861	Xesp-002861	Hvul_g18303_1	Hvul-g18303-1	Hvul-g18303-1
NV2g005918000.1	TRUE	TRUE				Xesp_002862	Xesp-002862	Xesp-002862	Hvul_g24476_1,Hvul_g18299_1,Hvul_g30846_1	Hvul-g24476-1,Hvul-g18299-1,Hvul-g30846-1	Hvul-g24476-1
NV2g005948000.1	TRUE	TRUE	Spis_XP_022801240_1	Spis-XP-022801240-1					Hvul_g4953_1	Hvul-g4953-1	Hvul-g4953-1
NV2g005949000.1	TRUE	TRUE	Spis16742_1,Spis_XP_022801238_1,Spis_XP_022801239_1	Spis16742-1,Spis-XP-022801238-1	Spis16742-1				Hvul_g18389_1	Hvul-g18389-1	Hvul-g18389-1
NV2g005950000.1	TRUE	TRUE
NV2g005951000.1	TRUE	TRUE
NV2g005952000.1	TRUE	TRUE
NV2g005953000.1	TRUE	TRUE
NV2g005954000.1	TRUE	TRUE
NV2g006008000.1	TRUE	TRUE
NV2g006021000.1	TRUE	TRUE	Spis_XP_022805382_1	Spis-XP-022805382-1		Xesp_002863	Xesp-002863	Xesp-002863	Hvul_g24476_1,Hvul_g18299_1,Hvul_g30846_1	Hvul-g24476-1,Hvul-g18299-1,Hvul-g30846-1	Hvul-g24476-1
NV2g006030000.1	TRUE	TRUE	Spis_XP_022798198_1
NV2g006031000.1	TRUE	TRUE
NV2g006032000.1	TRUE	TRUE	Spis_XP_022795019_1
NV2g006073000.1	TRUE	TRUE	Spis_XP_022786353_1	Spis-XP-022786353-1	Spis-XP-022786353-1
NV2g006102000.1	TRUE	TRUE
NV2g006103000.1	TRUE	TRUE
NV2g006105000.1	TRUE	FALSE
NV2g006109000.1	TRUE	TRUE
NV2g006119000.1	TRUE	TRUE	Spis_XP_022806562_1			Xesp_002376	Xesp-002376	Xesp-002376
NV2g006163000.1	TRUE	TRUE	Spis_XP_022809637_1			Xesp_002537	Xesp-002537	Xesp-002537	Hvul_g6004_1	Hvul-g6004-1
NV2g006295000.1	TRUE	TRUE	Spis_XP_022802951_1			Xesp_002776	Xesp-002776	Xesp-002776
NV2g006346000.1	TRUE	TRUE	Spis_XP_022809219_1	Spis-XP-022809219-1	Spis-XP-022809219-1
NV2g006347000.1	TRUE	TRUE
NV2g006355000.1	TRUE	TRUE	Spis_XP_022802603_1	Spis-XP-022802603-1					Hvul_g15375_1	Hvul-g15375-1	Hvul-g15375-1
NV2g006401000.1	TRUE	TRUE	Spis_XP_022788884_1			Xesp_002686,Xesp_009155,Xesp_009156,Xesp_009170	Xesp-002686,Xesp-009155,Xesp-009170
NV2g006436000.1	TRUE	FALSE	Spis_XP_022805245_1,Spis_XP_022794346_1,Spis_XP_022804293_1	Spis-XP-022804293-1
NV2g006439000.1	TRUE	TRUE	Spis_XP_022799981_1	Spis-XP-022799981-1					Hvul_g26934_1	Hvul-g26934-1	Hvul-g26934-1
NV2g006440000.1	TRUE	TRUE
NV2g006443000.1	TRUE	TRUE	Spis_XP_022799961_1,Spis_XP_022810609_1	Spis-XP-022799961-1,Spis-XP-022810609-1	Spis-XP-022799961-1,Spis-XP-022810609-1
NV2g006479000.1	TRUE	TRUE	Spis_XP_022806827_1			Xesp_001363,Xesp_001084,Xesp_022743,Xesp_022746,Xesp_022748,Xesp_022750,Xesp_022753	Xesp-001363,Xesp-001084,Xesp-022743,Xesp-022746,Xesp-022748,Xesp-022750,Xesp-022753	Xesp-022743,Xesp-022753	Hvul_g21599_1	Hvul-g21599-1	Hvul-g21599-1
NV2g006484000.1	TRUE	TRUE	Spis_XP_022804511_1			Xesp_021998,Xesp_024999	Xesp-021998,Xesp-024999	Xesp-024999	Hvul_g7830_1	Hvul-g7830-1
NV2g006517000.1	TRUE	TRUE	Spis_XP_022807218_1			Xesp_001297	Xesp-001297
NV2g006709000.1	TRUE	TRUE	Spis_XP_022799580_1,Spis_XP_022805428_1	Spis-XP-022799580-1		Xesp_012685,Xesp_022284	Xesp-012685,Xesp-022284		Hvul_g9879_1,Hvul_g1349_1,Hvul_g25677_1,Hvul_g25674_1,Hvul_g25666_1,Hvul_g17106_1,Hvul_g7402_1,Hvul_g3685_1,Hvul_g29411_1,Hvul_g33776_1,Hvul_g33775_1,Hvul_g33773_1	Hvul-g9879-1,Hvul-g1349-1,Hvul-g25677-1,Hvul-g17106-1,Hvul-g3685-1,Hvul-g33776-1	Hvul-g1349-1
NV2g006716000.1	TRUE	TRUE	Spis_XP_022786325_1	Spis-XP-022786325-1	Spis-XP-022786325-1	Xesp_002759	Xesp-002759	Xesp-002759
NV2g006749000.1	TRUE	TRUE	Spis_XP_022801243_1,Spis8572_1,Spis22418_1,Spis_XP_022801241_1	Spis-XP-022801243-1,Spis8572-1,Spis22418-1,Spis-XP-022801241-1		Xesp_002884	Xesp-002884	Xesp-002884	Hvul_g1321_1,Hvul_g1323_1	Hvul-g1321-1,Hvul-g1323-1	Hvul-g1321-1,Hvul-g1323-1
NV2g006767000.1	TRUE	TRUE	Spis_XP_022783421_1	Spis-XP-022783421-1					Hvul_g31033_1	Hvul-g31033-1
NV2g006768000.1	TRUE	TRUE	Spis_XP_022777787_1,Spis_XP_022787729_1,Spis_XP_022787754_1,Spis_XP_022787755_1,Spis_XP_022787732_1,Spis_XP_022787757_1,Spis_XP_022795160_1,Spis_XP_022787740_1,Spis_XP_022808371_1,Spis_XP_022787747_1,Spis_XP_022787750_1,Spis_XP_022788249_1	Spis-XP-022777787-1,Spis-XP-022787729-1,Spis-XP-022795160-1,Spis-XP-022787740-1,Spis-XP-022787747-1,Spis-XP-022787750-1
NV2g006788000.1	TRUE	TRUE	Spis_XP_022801243_1,Spis8572_1,Spis22418_1,Spis_XP_022801241_1	Spis-XP-022801243-1,Spis8572-1,Spis22418-1,Spis-XP-022801241-1		Xesp_002884	Xesp-002884	Xesp-002884	Hvul_g1321_1,Hvul_g1323_1	Hvul-g1321-1,Hvul-g1323-1	Hvul-g1321-1,Hvul-g1323-1
NV2g006994000.1	TRUE	TRUE	Spis_XP_022800269_1	Spis-XP-022800269-1		Xesp_018189	Xesp-018189	Xesp-018189
NV2g007009000.1	TRUE	TRUE	Spis_XP_022781966_1	Spis-XP-022781966-1		Xesp_016383	Xesp-016383	Xesp-016383	Hvul_g4711_1	Hvul-g4711-1
NV2g007010000.1	TRUE	TRUE
NV2g007030000.1	TRUE	TRUE
NV2g007139000.1	TRUE	TRUE	Spis_XP_022788438_1,Spis_XP_022794904_1,Spis_XP_022794903_1,Spis_XP_022794873_1,Spis_XP_022794878_1,Spis_XP_022794880_1,Spis_XP_022794906_1	Spis-XP-022794878-1		Xesp_001363,Xesp_001084,Xesp_022743,Xesp_022746,Xesp_022748,Xesp_022750,Xesp_022753	Xesp-001363,Xesp-001084,Xesp-022743,Xesp-022746,Xesp-022748,Xesp-022750,Xesp-022753	Xesp-022743,Xesp-022753	Hvul_g22672_1,Hvul_g33782_1,Hvul_g33783_1,Hvul_g10445_1,Hvul_g15169_1,Hvul_g22600_1,Hvul_g30640_1,Hvul_g30642_1,Hvul_g17954_1,Hvul_g6759_1	Hvul-g22672-1,Hvul-g33782-1	Hvul-g22672-1
NV2g007209000.1	TRUE	TRUE							Hvul_g24323_1,Hvul_g8772_1	Hvul-g24323-1,Hvul-g8772-1	Hvul-g8772-1,Hvul-g24323-1
NV2g007273000.1	TRUE	TRUE
NV2g007357000.1	TRUE	TRUE	Spis_XP_022785011_1	Spis-XP-022785011-1					Hvul_g16575_1,Hvul_g1965_1,Hvul_g30023_1,Hvul_g30024_1	Hvul-g1965-1,Hvul-g30023-1,Hvul-g30024-1
NV2g007385000.1	TRUE	TRUE							Hvul_g24323_1,Hvul_g8772_1	Hvul-g24323-1,Hvul-g8772-1	Hvul-g8772-1,Hvul-g24323-1
NV2g007568000.1	TRUE	TRUE							Hvul_g31349_1
NV2g007639000.1	TRUE	TRUE
NV2g007733000.1	TRUE	TRUE	Spis_XP_022790847_1			Xesp_016845	Xesp-016845	Xesp-016845
NV2g007788000.1	TRUE	TRUE	Spis_XP_022800298_1			Xesp_000705			Hvul_g4790_1	Hvul-g4790-1
NV2g008258000.1	TRUE	TRUE	Spis_XP_022785503_1	Spis-XP-022785503-1	Spis-XP-022785503-1
NV2g008259000.1	TRUE	TRUE	Spis_XP_022785541_1
NV2g008261000.1	TRUE	TRUE
NV2g008284000.1	TRUE	TRUE
NV2g008302000.1	TRUE	TRUE	Spis_XP_022781764_1	Spis-XP-022781764-1		Xesp_028983	Xesp-028983	Xesp-028983	Hvul_g27635_1	Hvul-g27635-1	Hvul-g27635-1
NV2g008324000.1	TRUE	TRUE	Spis_XP_022796735_1
NV2g008414000.1	TRUE	TRUE
NV2g008415000.1	TRUE	TRUE	Spis_XP_022785564_1,Spis_XP_022785563_1	Spis-XP-022785563-1
NV2g008421000.1	TRUE	TRUE	Spis_XP_022781205_1			Xesp_011282	Xesp-011282	Xesp-011282	Hvul_g5106_1	Hvul-g5106-1	Hvul-g5106-1
NV2g008462000.1	TRUE	TRUE	Spis_XP_022792590_1,Spis_XP_022806203_1,Spis_XP_022777747_1,Spis_XP_022806202_1,Spis_XP_022792591_1,Spis_XP_022806205_1	Spis-XP-022777747-1,Spis-XP-022806202-1,Spis-XP-022806205-1
NV2g008600000.1	TRUE	TRUE
NV2g008625000.1	TRUE	TRUE	Spis_XP_022796687_1	Spis-XP-022796687-1		Xesp_010818,Xesp_010301,Xesp_010817	Xesp-010818,Xesp-010301		Hvul_g19589_1	Hvul-g19589-1
NV2g008634000.1	TRUE	TRUE
NV2g008642000.1	TRUE	FALSE				Xesp_005705	Xesp-005705		Hvul_g25412_1	Hvul-g25412-1	Hvul-g25412-1
NV2g008659000.1	TRUE	TRUE
NV2g008660000.1	TRUE	TRUE	Spis_XP_022797262_1			Xesp_011277,Xesp_011278	Xesp-011277,Xesp-011278	Xesp-011277,Xesp-011278
NV2g008704000.1	TRUE	TRUE	Spis_XP_022798926_1,Spis_XP_022780839_1	Spis-XP-022780839-1		Xesp_008601,Xesp_008602	Xesp-008601,Xesp-008602
NV2g008737000.1	TRUE	TRUE	Spis_XP_022797283_1	Spis-XP-022797283-1		Xesp_010902,Xesp_028687	Xesp-010902	Xesp-010902
NV2g008764000.1	TRUE	TRUE
NV2g008765000.1	TRUE	TRUE
NV2g008777000.1	TRUE	TRUE	Spis_XP_022798005_1,Spis_XP_022805186_1
NV2g008818000.1	TRUE	TRUE				Xesp_024916	Xesp-024916
NV2g008962000.1	TRUE	TRUE	Spis_XP_022782193_1,Spis_XP_022806890_1,Spis_XP_022782519_1,Spis_XP_022782639_1	Spis-XP-022782193-1,Spis-XP-022782639-1		Xesp_002951	Xesp-002951		Hvul_g28134_1,Hvul_g29148_1	Hvul-g28134-1,Hvul-g29148-1	Hvul-g29148-1,Hvul-g28134-1
NV2g008974000.1	TRUE	TRUE	Spis_XP_022805489_1	Spis-XP-022805489-1		Xesp_011458	Xesp-011458	Xesp-011458
NV2g008977000.1	TRUE	TRUE	Spis_XP_022783601_1	Spis-XP-022783601-1					Hvul_g24903_1	Hvul-g24903-1	Hvul-g24903-1
NV2g009018000.1	TRUE	TRUE				Xesp_002081	Xesp-002081		Hvul_g15442_1	Hvul-g15442-1
NV2g009069000.1	TRUE	TRUE
NV2g009070000.1	TRUE	TRUE
NV2g009071000.1	TRUE	TRUE
NV2g009078000.1	TRUE	TRUE
NV2g009104000.1	TRUE	TRUE	Spis_XP_022785520_1
NV2g009190000.1	TRUE	TRUE							Hvul_g31349_1
NV2g009200000.1	TRUE	TRUE	Spis_XP_022777863_1,Spis_XP_022781343_1,Spis_XP_022794922_1,Spis_XP_022781404_1	Spis-XP-022777863-1,Spis-XP-022781404-1		Xesp_009731	Xesp-009731		Hvul_g19532_1	Hvul-g19532-1
NV2g009203000.1	TRUE	TRUE	Spis_XP_022777863_1,Spis_XP_022781343_1,Spis_XP_022794922_1,Spis_XP_022781404_1	Spis-XP-022777863-1,Spis-XP-022781404-1		Xesp_009731	Xesp-009731		Hvul_g19532_1	Hvul-g19532-1
NV2g009204000.1	TRUE	FALSE
NV2g009497000.1	TRUE	TRUE	Spis_XP_022783001_1,Spis_XP_022782988_1	Spis-XP-022782988-1		Xesp_008212,Xesp_008217	Xesp-008212,Xesp-008217	Xesp-008212,Xesp-008217
NV2g009503000.1	TRUE	TRUE							Hvul_g25747_1	Hvul-g25747-1	Hvul-g25747-1
NV2g009508000.1	TRUE	TRUE	Spis_XP_022779844_1	Spis-XP-022779844-1		Xesp_008543	Xesp-008543	Xesp-008543	Hvul_g20930_1	Hvul-g20930-1	Hvul-g20930-1
NV2g009511000.1	TRUE	TRUE	Spis_XP_022799605_1	Spis-XP-022799605-1	Spis-XP-022799605-1	Xesp_008177	Xesp-008177	Xesp-008177
NV2g009513000.1	TRUE	TRUE
NV2g009515000.1	TRUE	TRUE
NV2g009538000.1	TRUE	TRUE	Spis_XP_022779908_1,Spis_XP_022779927_1,Spis_XP_022779944_1	Spis-XP-022779908-1,Spis-XP-022779927-1,Spis-XP-022779944-1	Spis-XP-022779944-1,Spis-XP-022779927-1	Xesp_008451	Xesp-008451		Hvul_g6417_1	Hvul-g6417-1	Hvul-g6417-1
NV2g009619000.1	TRUE	TRUE
NV2g009655000.1	TRUE	TRUE	Spis_XP_022779840_1
NV2g009672000.1	TRUE	TRUE	Spis_XP_022802213_1			Xesp_008117	Xesp-008117		Hvul_g32585_1	Hvul-g32585-1	Hvul-g32585-1
NV2g009676000.1	TRUE	TRUE	Spis_XP_022798924_1	Spis-XP-022798924-1		Xesp_008157	Xesp-008157	Xesp-008157
NV2g009682000.1	TRUE	TRUE
NV2g009727000.1	TRUE	TRUE				Xesp_008514	Xesp-008514		Hvul_g6006_1	Hvul-g6006-1
NV2g009736000.1	TRUE	TRUE
NV2g009740000.1	TRUE	TRUE	Spis_XP_022789516_1
NV2g009741000.1	TRUE	TRUE
NV2g009745000.1	TRUE	TRUE
NV2g009747000.1	TRUE	TRUE	Spis_XP_022789499_1	Spis-XP-022789499-1	Spis-XP-022789499-1
NV2g009810000.1	TRUE	TRUE	Spis_XP_022802604_1	Spis-XP-022802604-1
NV2g009839000.1	TRUE	TRUE	Spis_XP_022780783_1	Spis-XP-022780783-1					Hvul_g6417_1	Hvul-g6417-1	Hvul-g6417-1
NV2g009849000.1	TRUE	TRUE	Spis_XP_022798902_1	Spis-XP-022798902-1		Xesp_025075,Xesp_028684,Xesp_000612,Xesp_028681,Xesp_025076,Xesp_026675	Xesp-025075,Xesp-028684,Xesp-000612,Xesp-028681,Xesp-025076,Xesp-026675		Hvul_g25134_1	Hvul-g25134-1
NV2g009862000.1	TRUE	TRUE
NV2g009863000.1	TRUE	TRUE	Spis_XP_022802603_1	Spis-XP-022802603-1					Hvul_g15375_1	Hvul-g15375-1	Hvul-g15375-1
NV2g009872000.1	TRUE	TRUE	Spis_XP_022782970_1	Spis-XP-022782970-1	Spis-XP-022782970-1	Xesp_008764	Xesp-008764	Xesp-008764	Hvul_g25047_1	Hvul-g25047-1	Hvul-g25047-1
NV2g009873000.1	TRUE	TRUE
NV2g009880000.1	TRUE	TRUE	Spis_XP_022780791_1	Spis-XP-022780791-1	Spis-XP-022780791-1
NV2g009881000.1	TRUE	TRUE
NV2g009885000.1	TRUE	TRUE
NV2g009886000.1	TRUE	FALSE
NV2g009989000.1	TRUE	TRUE
NV2g010004000.1	TRUE	TRUE	Spis_XP_022779882_1			Xesp_008173	Xesp-008173	Xesp-008173	Hvul_g33632_1	Hvul-g33632-1	Hvul-g33632-1
NV2g010005000.1	TRUE	TRUE	Spis_XP_022779934_1
NV2g010006000.1	TRUE	TRUE	Spis_XP_022779906_1	Spis-XP-022779906-1	Spis-XP-022779906-1	Xesp_008172	Xesp-008172	Xesp-008172	Hvul_g10351_1	Hvul-g10351-1	Hvul-g10351-1
NV2g010042000.1	TRUE	TRUE
NV2g010107000.1	TRUE	TRUE	Spis_XP_022780724_1	Spis-XP-022780724-1		Xesp_008404	Xesp-008404		Hvul_g32751_1	Hvul-g32751-1	Hvul-g32751-1
NV2g010134000.1	TRUE	TRUE	Spis_XP_022783624_1
NV2g010151000.1	TRUE	TRUE	Spis22012_1						Hvul_g3689_1,Hvul_g29780_1,Hvul_g27936_1,Hvul_g30676_1
NV2g010217000.1	TRUE	TRUE	Spis_XP_022780700_1			Xesp_012052	Xesp-012052		Hvul_g30025_1
NV2g010247000.1	TRUE	TRUE
NV2g010264000.1	TRUE	TRUE	Spis_XP_022791680_1			Xesp_006099	Xesp-006099	Xesp-006099	Hvul_g20766_1	Hvul-g20766-1	Hvul-g20766-1
NV2g010270000.1	TRUE	TRUE
NV2g010271000.1	TRUE	TRUE	Spis_XP_022786116_1	Spis-XP-022786116-1		Xesp_008389	Xesp-008389	Xesp-008389	Hvul_g10033_1	Hvul-g10033-1	Hvul-g10033-1
NV2g010282000.1	TRUE	TRUE
NV2g010334000.1	TRUE	TRUE	Spis_XP_022789479_1	Spis-XP-022789479-1	Spis-XP-022789479-1
NV2g010335000.1	TRUE	TRUE
NV2g010338000.1	TRUE	TRUE	Spis_XP_022789491_1	Spis-XP-022789491-1	Spis-XP-022789491-1	Xesp_008472	Xesp-008472	Xesp-008472
NV2g010339000.1	TRUE	TRUE	Spis_XP_022789491_1	Spis-XP-022789491-1	Spis-XP-022789491-1	Xesp_008472	Xesp-008472	Xesp-008472
NV2g010340000.1	TRUE	TRUE	Spis_XP_022789491_1	Spis-XP-022789491-1	Spis-XP-022789491-1	Xesp_008472	Xesp-008472	Xesp-008472
NV2g010341000.1	TRUE	TRUE	Spis_XP_022789491_1	Spis-XP-022789491-1	Spis-XP-022789491-1	Xesp_008472	Xesp-008472	Xesp-008472
NV2g010387000.1	TRUE	TRUE	Spis_XP_022780705_1	Spis-XP-022780705-1		Xesp_008542,Xesp_008540	Xesp-008542,Xesp-008540	Xesp-008540,Xesp-008542	Hvul_g13184_1	Hvul-g13184-1	Hvul-g13184-1
NV2g010388000.1	TRUE	TRUE	Spis_XP_022780747_1	Spis-XP-022780747-1					Hvul_g14109_1,Hvul_g14108_1	Hvul-g14109-1,Hvul-g14108-1	Hvul-g14109-1,Hvul-g14108-1
NV2g010390000.1	TRUE	TRUE	Spis_XP_022780795_1			Xesp_011542,Xesp_011536,Xesp_011580,Xesp_011546,Xesp_011529,Xesp_011579,Xesp_011555,Xesp_011524	Xesp-011524
NV2g010391000.1	TRUE	TRUE				Xesp_011542,Xesp_011536,Xesp_011580,Xesp_011546,Xesp_011529,Xesp_011579,Xesp_011555,Xesp_011524	Xesp-011524
NV2g010419000.1	TRUE	TRUE	Spis_XP_022802617_1,Spis_XP_022804572_1,Spis_XP_022804381_1,Spis_XP_022794893_1,Spis_XP_022794884_1	Spis-XP-022802617-1,Spis-XP-022794893-1					Hvul_g11517_1	Hvul-g11517-1	Hvul-g11517-1
NV2g010432000.1	TRUE	TRUE	Spis_XP_022802617_1,Spis_XP_022804572_1,Spis_XP_022804381_1,Spis_XP_022794893_1,Spis_XP_022794884_1	Spis-XP-022802617-1,Spis-XP-022794893-1					Hvul_g11517_1	Hvul-g11517-1	Hvul-g11517-1
NV2g010450000.1	TRUE	TRUE	Spis_XP_022780783_1	Spis-XP-022780783-1					Hvul_g6417_1	Hvul-g6417-1	Hvul-g6417-1
NV2g010464000.1	TRUE	TRUE
NV2g010465000.1	TRUE	TRUE
NV2g010467000.1	TRUE	TRUE
NV2g010468000.1	TRUE	TRUE
NV2g010470000.1	TRUE	TRUE	Spis_XP_022808980_1,Spis_XP_022801505_1,Spis6461_1,Spis_XP_022801491_1,Spis_XP_022810026_1,Spis_XP_022810015_1,Spis_XP_022801502_1,Spis_XP_022809815_1,Spis16930_1,Spis_XP_022808970_1,Spis_XP_022801499_1,Spis15615_1,Spis_XP_022801489_1,Spis_XP_022801498_1,Spis_XP_022799584_1,Spis_XP_022801504_1,Spis_XP_022777645_1,Spis_XP_022809640_1,Spis_XP_022801496_1,Spis24996_1,Spis_XP_022778363_1,Spis_XP_0227…	Spis-XP-022801505-1,Spis-XP-022810026-1,Spis-XP-022777645-1,Spis-XP-022809640-1,Spis-XP-022809320-1,Spis-XP-022792502-1,Spis-XP-022787418-1,Spis-XP-022787419-1
NV2g010471000.1	TRUE	FALSE
NV2g010539000.1	TRUE	TRUE	Spis_XP_022780781_1	Spis-XP-022780781-1		Xesp_008557	Xesp-008557	Xesp-008557	Hvul_g15379_1	Hvul-g15379-1	Hvul-g15379-1
NV2g010559000.1	TRUE	TRUE	Spis_XP_022802620_1	Spis-XP-022802620-1		Xesp_008108	Xesp-008108	Xesp-008108	Hvul_g15373_1,Hvul_g18386_1	Hvul-g15373-1,Hvul-g18386-1	Hvul-g15373-1,Hvul-g18386-1
NV2g010560000.1	TRUE	TRUE	Spis_XP_022802621_1			Xesp_008109	Xesp-008109	Xesp-008109	Hvul_g6961_1	Hvul-g6961-1	Hvul-g6961-1
NV2g010591000.1	TRUE	TRUE	Spis_XP_022793238_1,Spis_XP_022786563_1,Spis3057_1,Spis_XP_022779921_1,Spis_XP_022779922_1,Spis17057_1,Spis_XP_022801742_1,Spis_XP_022785078_1,Spis_XP_022783543_1,Spis_XP_022810110_1	Spis-XP-022779921-1		Xesp_003552,Xesp_003549,Xesp_003555,Xesp_003554,Xesp_003536,Xesp_003548,Xesp_003553	Xesp-003549,Xesp-003555,Xesp-003548
NV2g010615000.1	TRUE	TRUE	Spis_XP_022787271_1			Xesp_000447,Xesp_000451,Xesp_000450	Xesp-000447,Xesp-000451,Xesp-000450	Xesp-000450,Xesp-000447,Xesp-000451	Hvul_g32811_1	Hvul-g32811-1	Hvul-g32811-1
NV2g010629000.1	TRUE	TRUE	Spis_XP_022804144_1			Xesp_009629	Xesp-009629	Xesp-009629
NV2g010646000.1	TRUE	TRUE	Spis_XP_022797234_1,Spis_XP_022785720_1	Spis-XP-022797234-1					Hvul_g24784_1	Hvul-g24784-1	Hvul-g24784-1
NV2g010686000.1	TRUE	TRUE	Spis_XP_022787371_1	Spis-XP-022787371-1	Spis-XP-022787371-1	Xesp_028815	Xesp-028815	Xesp-028815	Hvul_g33051_1,Hvul_g33053_1	Hvul-g33051-1,Hvul-g33053-1	Hvul-g33051-1,Hvul-g33053-1
NV2g010696000.1	TRUE	TRUE	Spis_XP_022796317_1,Spis_XP_022796302_1,Spis_XP_022796298_1	Spis-XP-022796317-1		Xesp_009479	Xesp-009479		Hvul_g2830_1,Hvul_g2837_1,Hvul_g5269_1	Hvul-g2830-1,Hvul-g2837-1,Hvul-g5269-1	Hvul-g2837-1
NV2g010707000.1	TRUE	TRUE	Spis_XP_022795932_1						Hvul_g25772_1	Hvul-g25772-1
NV2g010739000.1	TRUE	TRUE
NV2g010782000.1	TRUE	TRUE	Spis_XP_022801034_1			Xesp_009433	Xesp-009433	Xesp-009433
NV2g010902000.1	TRUE	TRUE
NV2g010924000.1	TRUE	TRUE	Spis_XP_022793659_1	Spis-XP-022793659-1		Xesp_021983	Xesp-021983		Hvul_g30715_1	Hvul-g30715-1
NV2g010952000.1	TRUE	TRUE
NV2g010959000.1	TRUE	FALSE	Spis_XP_022779283_1,Spis_XP_022779251_1,Spis_XP_022779255_1,Spis_XP_022779256_1,Spis_XP_022779335_1	Spis-XP-022779255-1,Spis-XP-022779335-1		Xesp_009290	Xesp-009290		Hvul_g11528_1	Hvul-g11528-1
NV2g010994000.1	TRUE	TRUE
NV2g010995000.1	TRUE	TRUE				Xesp_000709	Xesp-000709	Xesp-000709	Hvul_g32799_1	Hvul-g32799-1	Hvul-g32799-1
NV2g010997000.1	TRUE	TRUE	Spis_XP_022788521_1			Xesp_000710	Xesp-000710	Xesp-000710	Hvul_g18788_1,Hvul_g31724_1,Hvul_g3928_1	Hvul-g18788-1,Hvul-g31724-1,Hvul-g3928-1	Hvul-g18788-1,Hvul-g31724-1,Hvul-g3928-1
NV2g011006000.1	TRUE	TRUE	Spis_XP_022798841_1			Xesp_000705			Hvul_g4790_1	Hvul-g4790-1
NV2g011025000.1	TRUE	TRUE	Spis_XP_022791280_1	Spis-XP-022791280-1		Xesp_021418,Xesp_021415	Xesp-021418,Xesp-021415		Hvul_g21761_1	Hvul-g21761-1
NV2g011057000.1	TRUE	FALSE	Spis_XP_022782618_1			Xesp_000696	Xesp-000696
NV2g011074000.1	TRUE	TRUE	Spis_XP_022788523_1			Xesp_000708	Xesp-000708	Xesp-000708	Hvul_g7149_1	Hvul-g7149-1	Hvul-g7149-1
NV2g011077000.1	TRUE	TRUE	Spis_XP_022788525_1	Spis-XP-022788525-1	Spis-XP-022788525-1	Xesp_000707	Xesp-000707	Xesp-000707
NV2g011078000.1	TRUE	TRUE
NV2g011080000.1	TRUE	TRUE	Spis_XP_022779908_1,Spis_XP_022779927_1,Spis_XP_022779944_1	Spis-XP-022779908-1,Spis-XP-022779927-1,Spis-XP-022779944-1	Spis-XP-022779944-1,Spis-XP-022779927-1	Xesp_008451	Xesp-008451		Hvul_g6417_1	Hvul-g6417-1	Hvul-g6417-1
NV2g011286000.1	TRUE	TRUE	Spis_XP_022793141_1	Spis-XP-022793141-1	Spis-XP-022793141-1	Xesp_022164	Xesp-022164	Xesp-022164	Hvul_g7363_1	Hvul-g7363-1	Hvul-g7363-1
NV2g011288000.1	TRUE	TRUE
NV2g011289000.1	TRUE	TRUE	Spis_XP_022793141_1	Spis-XP-022793141-1	Spis-XP-022793141-1	Xesp_022164	Xesp-022164	Xesp-022164	Hvul_g7363_1	Hvul-g7363-1	Hvul-g7363-1
NV2g011297000.1	TRUE	TRUE
NV2g011317000.1	TRUE	TRUE	Spis_XP_022792048_1	Spis-XP-022792048-1		Xesp_025159	Xesp-025159	Xesp-025159	Hvul_g31060_1,Hvul_g31061_1	Hvul-g31060-1,Hvul-g31061-1	Hvul-g31061-1,Hvul-g31060-1
NV2g011375000.1	TRUE	FALSE	Spis_XP_022793119_1
NV2g011395000.1	TRUE	TRUE	Spis_XP_022803362_1			Xesp_009309	Xesp-009309
NV2g011424000.1	TRUE	TRUE	Spis_XP_022803917_1	Spis-XP-022803917-1
NV2g011456000.1	TRUE	FALSE
NV2g011584000.1	TRUE	TRUE	Spis_XP_022798876_1						Hvul_g28847_1,Hvul_g24271_1,Hvul_g28849_1	Hvul-g28847-1,Hvul-g24271-1,Hvul-g28849-1	Hvul-g24271-1
NV2g011673000.1	TRUE	TRUE	Spis_XP_022787295_1			Xesp_000453	Xesp-000453	Xesp-000453	Hvul_g32811_1	Hvul-g32811-1	Hvul-g32811-1
NV2g011675000.1	TRUE	TRUE	Spis_XP_022787272_1
NV2g011720000.1	TRUE	TRUE
NV2g011721000.1	TRUE	TRUE
NV2g011723000.1	TRUE	TRUE
NV2g011724000.1	TRUE	TRUE
NV2g011797000.1	TRUE	TRUE
NV2g011814000.1	TRUE	TRUE	Spis18341_1	Spis18341-1	Spis18341-1				Hvul_g33051_1,Hvul_g33053_1	Hvul-g33051-1,Hvul-g33053-1	Hvul-g33051-1,Hvul-g33053-1
NV2g011816000.1	TRUE	TRUE
NV2g011821000.1	TRUE	TRUE
NV2g011825000.1	TRUE	TRUE	Spis_XP_022803637_1	Spis-XP-022803637-1	Spis-XP-022803637-1
NV2g011829000.1	TRUE	TRUE	Spis_XP_022785131_1	Spis-XP-022785131-1		Xesp_022222	Xesp-022222		Hvul_g23814_1	Hvul-g23814-1
NV2g011854000.1	FALSE	FALSE
NV2g011931000.1	TRUE	TRUE	Spis_XP_022796317_1,Spis_XP_022796302_1,Spis_XP_022796298_1	Spis-XP-022796317-1		Xesp_009479	Xesp-009479		Hvul_g2830_1,Hvul_g2837_1,Hvul_g5269_1	Hvul-g2830-1,Hvul-g2837-1,Hvul-g5269-1	Hvul-g2837-1
NV2g011971000.1	TRUE	TRUE	Spis_XP_022778973_1,Spis_XP_022778992_1,Spis_XP_022778969_1,Spis2571_1,Spis_XP_022779049_1,Spis_XP_022779066_1,Spis_XP_022779067_1	Spis-XP-022778973-1,Spis-XP-022779066-1	Spis-XP-022779066-1	Xesp_025224	Xesp-025224	Xesp-025224
NV2g011994000.1	TRUE	FALSE
NV2g012016000.1	TRUE	FALSE				Xesp_022176			Hvul_g14229_1	Hvul-g14229-1	Hvul-g14229-1
NV2g012134000.1	TRUE	TRUE
NV2g012238000.1	TRUE	TRUE
NV2g012323000.1	TRUE	TRUE
NV2g012363000.1	TRUE	TRUE	Spis_XP_022786113_1,Spis_XP_022806991_1	Spis-XP-022786113-1		Xesp_008530,Xesp_008123,Xesp_028819	Xesp-008530,Xesp-008123
NV2g012483000.1	TRUE	TRUE	Spis_XP_022791592_1			Xesp_022247	Xesp-022247	Xesp-022247	Hvul_g33054_1	Hvul-g33054-1
NV2g012511000.1	TRUE	TRUE	Spis_XP_022791864_1			Xesp_009244	Xesp-009244	Xesp-009244	Hvul_g6515_1	Hvul-g6515-1	Hvul-g6515-1
NV2g012529000.1	TRUE	TRUE	Spis_XP_022794318_1			Xesp_001302,Xesp_001303,Xesp_002647,Xesp_002649,Xesp_002650,Xesp_027238,Xesp_027241,Xesp_027234,Xesp_027235,Xesp_027231,Xesp_027233	Xesp-001302,Xesp-001303,Xesp-002647,Xesp-002649,Xesp-002650,Xesp-027238,Xesp-027241,Xesp-027234,Xesp-027235		Hvul_g20123_1	Hvul-g20123-1
NV2g012532000.1	TRUE	TRUE
NV2g012534000.1	TRUE	TRUE	Spis_XP_022788500_1	Spis-XP-022788500-1	Spis-XP-022788500-1
NV2g012535000.1	TRUE	TRUE	Spis_XP_022788551_1	Spis-XP-022788551-1
NV2g012537000.1	TRUE	TRUE
NV2g012538000.1	TRUE	TRUE
NV2g012539000.1	TRUE	TRUE	Spis_XP_022788498_1	Spis-XP-022788498-1	Spis-XP-022788498-1
NV2g012541000.1	TRUE	FALSE
NV2g012542000.1	TRUE	TRUE	Spis_XP_022788536_1	Spis-XP-022788536-1		Xesp_000701	Xesp-000701	Xesp-000701	Hvul_g21236_1	Hvul-g21236-1	Hvul-g21236-1
NV2g012554000.1	TRUE	TRUE	Spis_XP_022800617_1	Spis-XP-022800617-1	Spis-XP-022800617-1
NV2g012555000.1	TRUE	TRUE	Spis_XP_022778281_1			Xesp_021445	Xesp-021445	Xesp-021445
NV2g012589000.1	TRUE	TRUE	Spis_XP_022800564_1						Hvul_g25375_1	Hvul-g25375-1	Hvul-g25375-1
NV2g012616000.1	TRUE	TRUE	Spis_XP_022782657_1	Spis-XP-022782657-1					Hvul_g7858_1	Hvul-g7858-1	Hvul-g7858-1
NV2g012621000.1	TRUE	TRUE	Spis_XP_022804287_1,Spis_XP_022804270_1	Spis-XP-022804287-1,Spis-XP-022804270-1	Spis-XP-022804270-1,Spis-XP-022804287-1	Xesp_001209,Xesp_009933	Xesp-001209,Xesp-009933	Xesp-009933,Xesp-001209	Hvul_g33051_1,Hvul_g33053_1	Hvul-g33051-1,Hvul-g33053-1	Hvul-g33051-1,Hvul-g33053-1
NV2g012623000.1	TRUE	TRUE	Spis_XP_022804287_1,Spis_XP_022804270_1	Spis-XP-022804287-1,Spis-XP-022804270-1	Spis-XP-022804270-1,Spis-XP-022804287-1	Xesp_001209,Xesp_009933	Xesp-001209,Xesp-009933	Xesp-009933,Xesp-001209	Hvul_g33051_1,Hvul_g33053_1	Hvul-g33051-1,Hvul-g33053-1	Hvul-g33051-1,Hvul-g33053-1
NV2g012656000.1	TRUE	TRUE
NV2g012671000.1	TRUE	TRUE
NV2g012690000.1	TRUE	TRUE	Spis_XP_022803638_1	Spis-XP-022803638-1	Spis-XP-022803638-1
NV2g012695000.1	TRUE	TRUE	Spis_XP_022801956_1	Spis-XP-022801956-1					Hvul_g10782_1	Hvul-g10782-1	Hvul-g10782-1
NV2g012782000.1	TRUE	TRUE
NV2g012783000.1	TRUE	TRUE	Spis_XP_022800599_1	Spis-XP-022800599-1		Xesp_022398	Xesp-022398	Xesp-022398	Hvul_g29951_1	Hvul-g29951-1	Hvul-g29951-1
NV2g012784000.1	TRUE	TRUE
NV2g012788000.1	TRUE	TRUE	Spis_XP_022791835_1	Spis-XP-022791835-1	Spis-XP-022791835-1	Xesp_009432	Xesp-009432	Xesp-009432
NV2g012806000.1	TRUE	TRUE	Spis_XP_022788751_1			Xesp_009703	Xesp-009703	Xesp-009703
NV2g012814000.1	TRUE	TRUE	Spis_XP_022791301_1			Xesp_021418,Xesp_021415	Xesp-021418,Xesp-021415		Hvul_g21761_1	Hvul-g21761-1
NV2g012875000.1	TRUE	TRUE	Spis_XP_022788355_1
NV2g012896000.1	TRUE	TRUE	Spis_XP_022788267_1	Spis-XP-022788267-1	Spis-XP-022788267-1
NV2g012900000.1	TRUE	TRUE	Spis_XP_022782667_1,Spis_XP_022782665_1,Spis_XP_022782666_1,Spis_XP_022782650_1,Spis_XP_022782715_1	Spis-XP-022782667-1,Spis-XP-022782650-1,Spis-XP-022782715-1	Spis-XP-022782715-1	Xesp_014798	Xesp-014798	Xesp-014798	Hvul_g19392_1,Hvul_g24455_1,Hvul_g24456_1	Hvul-g24455-1,Hvul-g24456-1	Hvul-g24455-1,Hvul-g24456-1
NV2g012907000.1	TRUE	TRUE
NV2g012942000.1	TRUE	FALSE	Spis_XP_022779303_1						Hvul_g24401_1
NV2g012993000.1	TRUE	TRUE	Spis_XP_022778973_1,Spis_XP_022778992_1,Spis_XP_022778969_1,Spis2571_1,Spis_XP_022779049_1,Spis_XP_022779066_1,Spis_XP_022779067_1	Spis-XP-022778973-1,Spis-XP-022779066-1	Spis-XP-022779066-1	Xesp_025224	Xesp-025224	Xesp-025224
NV2g013045000.1	TRUE	TRUE	Spis_XP_022798655_1	Spis-XP-022798655-1	Spis-XP-022798655-1	Xesp_021727	Xesp-021727	Xesp-021727
NV2g013058000.1	TRUE	TRUE	Spis_XP_022807233_1	Spis-XP-022807233-1		Xesp_020948	Xesp-020948	Xesp-020948
NV2g013059000.1	TRUE	TRUE	Spis_XP_022807225_1	Spis-XP-022807225-1	Spis-XP-022807225-1	Xesp_020951,Xesp_020949	Xesp-020951,Xesp-020949	Xesp-020951,Xesp-020949	Hvul_g30052_1,Hvul_g30051_1	Hvul-g30052-1,Hvul-g30051-1	Hvul-g30051-1,Hvul-g30052-1
NV2g013194000.1	TRUE	TRUE	Spis_XP_022798874_1	Spis-XP-022798874-1	Spis-XP-022798874-1	Xesp_013144,Xesp_013247	Xesp-013144,Xesp-013247	Xesp-013144	Hvul_g11273_1	Hvul-g11273-1	Hvul-g11273-1
NV2g013225000.1	TRUE	TRUE				Xesp_001336,Xesp_001340	Xesp-001336,Xesp-001340
NV2g013246000.1	TRUE	TRUE	Spis_XP_022789836_1			Xesp_012860	Xesp-012860	Xesp-012860	Hvul_g1175_1	Hvul-g1175-1	Hvul-g1175-1
NV2g013261000.1	TRUE	TRUE	Spis_XP_022777975_1,Spis_XP_022793511_1	Spis-XP-022777975-1	Spis-XP-022777975-1	Xesp_012899	Xesp-012899
NV2g013300000.1	TRUE	TRUE	Spis_XP_022809051_1,Spis_XP_022788807_1,Spis_XP_022805434_1,Spis_XP_022788763_1,Spis_XP_022799179_1,Spis24999_1	Spis-XP-022788763-1		Xesp_012810	Xesp-012810
NV2g013304000.1	TRUE	TRUE	Spis_XP_022782690_1,Spis_XP_022791081_1			Xesp_022192
NV2g013345000.1	TRUE	TRUE	Spis_XP_022803868_1
NV2g013381000.1	TRUE	TRUE	Spis_XP_022808799_1	Spis-XP-022808799-1		Xesp_020333,Xesp_012932	Xesp-020333,Xesp-012932	Xesp-020333,Xesp-012932	Hvul_g7267_1	Hvul-g7267-1
NV2g013424000.1	TRUE	TRUE	Spis_XP_022798609_1	Spis-XP-022798609-1	Spis-XP-022798609-1
NV2g013439000.1	TRUE	TRUE	Spis_XP_022805342_1			Xesp_009874,Xesp_025390,Xesp_025389	Xesp-009874,Xesp-025390	Xesp-009874,Xesp-025390
NV2g013448000.1	TRUE	TRUE	Spis_XP_022794112_1	Spis-XP-022794112-1		Xesp_002909	Xesp-002909		Hvul_g5157_1	Hvul-g5157-1
NV2g013450000.1	TRUE	TRUE	Spis_XP_022794112_1	Spis-XP-022794112-1		Xesp_002909	Xesp-002909		Hvul_g5157_1	Hvul-g5157-1
NV2g013500000.1	TRUE	TRUE	Spis_XP_022805231_1	Spis-XP-022805231-1		Xesp_021771	Xesp-021771	Xesp-021771	Hvul_g11446_1	Hvul-g11446-1	Hvul-g11446-1
NV2g013521000.1	TRUE	TRUE	Spis_XP_022801951_1						Hvul_g5599_1,Hvul_g5600_1,Hvul_g5598_1,Hvul_g5609_1	Hvul-g5600-1,Hvul-g5598-1,Hvul-g5609-1
NV2g013532000.1	TRUE	TRUE	Spis_XP_022789843_1,Spis_XP_022792777_1,Spis_XP_022790422_1			Xesp_012936,Xesp_012937	Xesp-012936,Xesp-012937	Xesp-012937	Hvul_g23232_1	Hvul-g23232-1
NV2g013584000.1	TRUE	TRUE	Spis_XP_022783819_1,Spis_XP_022798834_1	Spis-XP-022783819-1,Spis-XP-022798834-1					Hvul_g21021_1	Hvul-g21021-1	Hvul-g21021-1
NV2g013683000.1	TRUE	TRUE
NV2g013735000.1	TRUE	TRUE	Spis15796_1
NV2g013798000.1	TRUE	TRUE	Spis_XP_022783867_1
NV2g013802000.1	TRUE	TRUE							Hvul_g27351_1	Hvul-g27351-1
NV2g013804000.1	TRUE	TRUE	Spis_XP_022799583_1			Xesp_012763	Xesp-012763		Hvul_g18523_1	Hvul-g18523-1	Hvul-g18523-1
NV2g013897000.1	TRUE	TRUE	Spis_XP_022800175_1	Spis-XP-022800175-1	Spis-XP-022800175-1	Xesp_020745	Xesp-020745		Hvul_g2289_1	Hvul-g2289-1	Hvul-g2289-1
NV2g013964000.1	TRUE	FALSE	Spis_XP_022797695_1,Spis_XP_022797688_1	Spis-XP-022797695-1					Hvul_g24294_1	Hvul-g24294-1
NV2g014004000.1	TRUE	TRUE	Spis_XP_022803151_1,Spis_XP_022787797_1,Spis_XP_022805322_1						Hvul_g21805_1	Hvul-g21805-1
NV2g014005000.1	TRUE	TRUE	Spis_XP_022797792_1	Spis-XP-022797792-1		Xesp_012746	Xesp-012746	Xesp-012746	Hvul_g24537_1,Hvul_g24540_1	Hvul-g24537-1,Hvul-g24540-1
NV2g014006000.1	TRUE	TRUE
NV2g014010000.1	TRUE	TRUE	Spis_XP_022797819_1			Xesp_012747	Xesp-012747	Xesp-012747
NV2g014011000.1	TRUE	TRUE	Spis_XP_022797817_1,Spis_XP_022797815_1	Spis-XP-022797817-1,Spis-XP-022797815-1	Spis-XP-022797817-1
NV2g014012000.1	TRUE	TRUE	Spis_XP_022797826_1,Spis_XP_022797814_1	Spis-XP-022797814-1
NV2g014077000.1	FALSE	FALSE				Xesp_026887			Hvul_g2242_1,Hvul_g4361_1,Hvul_g3326_1,Hvul_g31574_1,Hvul_g18108_1,Hvul_g9506_1,Hvul_g5027_1,Hvul_g2238_1,Hvul_g12611_1,Hvul_g25473_1,Hvul_g7690_1,Hvul_g21738_1,Hvul_g16958_1,Hvul_g2239_1,Hvul_g12612_1,Hvul_g21737_1,Hvul_g16957_1,Hvul_g11292_1,Hvul_g3243_1,Hvul_g7148_1,Hvul_g13636_1,Hvul_g23773_1,Hvul_g1787_1,Hvul_g963_1,Hvul_g23778_1,Hvul_g19220_1,Hvul_g1307_1,Hvul_g21093_1,Hvul_g3323_1,Hvul_g11…	Hvul-g19220-1,Hvul-g21093-1,Hvul-g16010-1	Hvul-g16010-1,Hvul-g21093-1
NV2g014187000.1	TRUE	TRUE	Spis_XP_022780135_1	Spis-XP-022780135-1		Xesp_012815	Xesp-012815	Xesp-012815
NV2g014193000.1	TRUE	TRUE	Spis_XP_022792496_1	Spis-XP-022792496-1
NV2g014197000.1	TRUE	TRUE	Spis_XP_022807844_1
NV2g014230000.1	TRUE	TRUE	Spis_XP_022797704_1	Spis-XP-022797704-1		Xesp_020676	Xesp-020676	Xesp-020676	Hvul_g2807_1	Hvul-g2807-1	Hvul-g2807-1
NV2g014235000.1	TRUE	TRUE
NV2g014236000.1	TRUE	TRUE	Spis_XP_022793507_1,Spis_XP_022789565_1	Spis-XP-022793507-1		Xesp_012890	Xesp-012890	Xesp-012890	Hvul_g31297_1	Hvul-g31297-1	Hvul-g31297-1
NV2g014320000.1	TRUE	TRUE	Spis_XP_022784077_1						Hvul_g3055_1	Hvul-g3055-1	Hvul-g3055-1
NV2g014321000.1	TRUE	FALSE	Spis_XP_022805442_1
NV2g014373000.1	TRUE	TRUE	Spis_XP_022803944_1	Spis-XP-022803944-1		Xesp_027439	Xesp-027439
NV2g014440000.1	TRUE	TRUE	Spis_XP_022789838_1			Xesp_012886	Xesp-012886	Xesp-012886	Hvul_g28061_1	Hvul-g28061-1	Hvul-g28061-1
NV2g014445000.1	TRUE	TRUE	Spis_XP_022783605_1
NV2g014459000.1	TRUE	TRUE	Spis_XP_022810126_1			Xesp_012614	Xesp-012614		Hvul_g24126_1	Hvul-g24126-1
NV2g014549000.1	TRUE	TRUE	Spis_XP_022788789_1			Xesp_012723	Xesp-012723		Hvul_g33146_1,Hvul_g25259_1,Hvul_g33141_1,Hvul_g20359_1,Hvul_g20360_1	Hvul-g33146-1,Hvul-g25259-1,Hvul-g20360-1	Hvul-g25259-1
NV2g014564000.1	TRUE	TRUE	Spis_XP_022804208_1,Spis_XP_022804207_1			Xesp_020561	Xesp-020561	Xesp-020561	Hvul_g31381_1	Hvul-g31381-1
NV2g014591000.1	TRUE	TRUE	Spis_XP_022797907_1	Spis-XP-022797907-1		Xesp_020946	Xesp-020946
NV2g014593000.1	TRUE	TRUE
NV2g014624000.1	TRUE	TRUE	Spis_XP_022803120_1	Spis-XP-022803120-1		Xesp_022398	Xesp-022398	Xesp-022398	Hvul_g29951_1	Hvul-g29951-1	Hvul-g29951-1
NV2g014625000.1	TRUE	TRUE	Spis_XP_022803120_1	Spis-XP-022803120-1		Xesp_022398	Xesp-022398	Xesp-022398	Hvul_g29951_1	Hvul-g29951-1	Hvul-g29951-1
NV2g014626000.1	TRUE	TRUE
NV2g014741000.1	TRUE	TRUE	Spis_XP_022792496_1	Spis-XP-022792496-1
NV2g014766000.1	TRUE	TRUE
NV2g014847000.1	TRUE	TRUE
NV2g015213000.1	TRUE	TRUE	Spis_XP_022788776_1	Spis-XP-022788776-1		Xesp_012560	Xesp-012560		Hvul_g6887_1	Hvul-g6887-1
NV2g015241000.1	TRUE	TRUE	Spis_XP_022803865_1	Spis-XP-022803865-1		Xesp_013000	Xesp-013000	Xesp-013000
NV2g015251000.1	TRUE	TRUE	Spis_XP_022798486_1,Spis_XP_022798503_1	Spis-XP-022798486-1		Xesp_004273
NV2g015267000.1	TRUE	TRUE
NV2g015283000.1	TRUE	TRUE	Spis_XP_022807232_1	Spis-XP-022807232-1	Spis-XP-022807232-1	Xesp_020332	Xesp-020332	Xesp-020332	Hvul_g16816_1	Hvul-g16816-1	Hvul-g16816-1
NV2g015546000.1	TRUE	TRUE	Spis_XP_022798678_1	Spis-XP-022798678-1	Spis-XP-022798678-1	Xesp_019282	Xesp-019282	Xesp-019282
NV2g015639000.1	TRUE	TRUE	Spis_XP_022803524_1			Xesp_020921	Xesp-020921	Xesp-020921
NV2g015701000.1	TRUE	TRUE
NV2g015706000.1	TRUE	FALSE
NV2g015718000.1	TRUE	TRUE	Spis_XP_022783906_1			Xesp_005077	Xesp-005077	Xesp-005077
NV2g015724000.1	TRUE	TRUE	Spis_XP_022783906_1			Xesp_005077	Xesp-005077	Xesp-005077
NV2g015725000.1	TRUE	FALSE
NV2g015758000.1	TRUE	TRUE
NV2g015807000.1	TRUE	TRUE
NV2g015808000.1	TRUE	TRUE
NV2g015810000.1	TRUE	TRUE	Spis_XP_022792077_1			Xesp_005088	Xesp-005088	Xesp-005088
NV2g015854000.1	TRUE	TRUE	Spis_XP_022782667_1,Spis_XP_022782665_1,Spis_XP_022782666_1,Spis_XP_022782650_1,Spis_XP_022782715_1	Spis-XP-022782667-1,Spis-XP-022782650-1,Spis-XP-022782715-1	Spis-XP-022782715-1	Xesp_014798	Xesp-014798	Xesp-014798	Hvul_g19392_1,Hvul_g24455_1,Hvul_g24456_1	Hvul-g24455-1,Hvul-g24456-1	Hvul-g24455-1,Hvul-g24456-1
NV2g015872000.1	TRUE	TRUE				Xesp_000190,Xesp_014522	Xesp-000190,Xesp-014522	Xesp-000190	Hvul_g30722_1	Hvul-g30722-1	Hvul-g30722-1
NV2g015874000.1	TRUE	TRUE	Spis_XP_022789750_1			Xesp_004375	Xesp-004375	Xesp-004375	Hvul_g511_1,Hvul_g14520_1	Hvul-g14520-1	Hvul-g14520-1
NV2g015932000.1	TRUE	TRUE
NV2g015933000.1	TRUE	TRUE
NV2g016007000.1	TRUE	TRUE	Spis_XP_022803523_1	Spis-XP-022803523-1
NV2g016008000.1	TRUE	TRUE	Spis_XP_022803521_1	Spis-XP-022803521-1
NV2g016021000.1	TRUE	TRUE	Spis_XP_022809333_1	Spis-XP-022809333-1		Xesp_004955	Xesp-004955	Xesp-004955	Hvul_g184_1	Hvul-g184-1
NV2g016031000.1	TRUE	TRUE	Spis_XP_022798441_1			Xesp_019284	Xesp-019284
NV2g016033000.1	TRUE	TRUE	Spis_XP_022798441_1			Xesp_019284	Xesp-019284
NV2g016097000.1	TRUE	TRUE	Spis_XP_022801400_1,Spis_XP_022801401_1	Spis-XP-022801400-1		Xesp_004972	Xesp-004972		Hvul_g11670_1	Hvul-g11670-1
NV2g016227000.1	TRUE	TRUE
NV2g016318000.1	TRUE	TRUE	Spis_XP_022785817_1
NV2g016333000.1	TRUE	TRUE				Xesp_004874	Xesp-004874	Xesp-004874	Hvul_g3345_1	Hvul-g3345-1	Hvul-g3345-1
NV2g016334000.1	TRUE	TRUE	Spis_XP_022783895_1	Spis-XP-022783895-1	Spis-XP-022783895-1	Xesp_004874	Xesp-004874	Xesp-004874	Hvul_g3345_1	Hvul-g3345-1	Hvul-g3345-1
NV2g016361000.1	TRUE	TRUE
NV2g016382000.1	TRUE	TRUE
NV2g016383000.1	TRUE	TRUE	Spis_XP_022808616_1			Xesp_000287	Xesp-000287	Xesp-000287
NV2g016606000.1	TRUE	TRUE	Spis_XP_022794246_1	Spis-XP-022794246-1		Xesp_002759	Xesp-002759	Xesp-002759	Hvul_g7641_1	Hvul-g7641-1
NV2g016632000.1	TRUE	TRUE	Spis_XP_022802411_1
NV2g016692000.1	TRUE	TRUE
NV2g016703000.1	TRUE	TRUE	Spis_XP_022802065_1			Xesp_029154	Xesp-029154
NV2g016877000.1	TRUE	FALSE	Spis_XP_022797575_1,Spis_XP_022797568_1	Spis-XP-022797568-1					Hvul_g3520_1	Hvul-g3520-1	Hvul-g3520-1
NV2g016941000.1	TRUE	TRUE	Spis_XP_022799853_1			Xesp_000212	Xesp-000212
NV2g016972000.1	TRUE	TRUE	Spis_XP_022808214_1	Spis-XP-022808214-1		Xesp_004387	Xesp-004387		Hvul_g24346_1,Hvul_g24347_1	Hvul-g24346-1,Hvul-g24347-1	Hvul-g24346-1,Hvul-g24347-1
NV2g017001000.1	TRUE	TRUE
NV2g017002000.1	TRUE	TRUE	Spis_XP_022800515_1	Spis-XP-022800515-1		Xesp_004432	Xesp-004432	Xesp-004432
NV2g017003000.1	TRUE	TRUE	Spis_XP_022800518_1	Spis-XP-022800518-1	Spis-XP-022800518-1
NV2g017020000.1	TRUE	TRUE
NV2g017080000.1	TRUE	TRUE	Spis_XP_022801400_1,Spis_XP_022801401_1	Spis-XP-022801400-1		Xesp_004972	Xesp-004972		Hvul_g11670_1	Hvul-g11670-1
NV2g017108000.1	TRUE	TRUE
NV2g017109000.1	TRUE	TRUE
NV2g017121000.1	TRUE	FALSE	Spis_XP_022790752_1			Xesp_007819	Xesp-007819	Xesp-007819	Hvul_g27647_1	Hvul-g27647-1
NV2g017145000.1	TRUE	TRUE	Spis_XP_022778037_1,Spis_XP_022777800_1,Spis_XP_022809398_1,Spis_XP_022808656_1,Spis_XP_022808888_1,Spis_XP_022809399_1,Spis_XP_022808882_1,Spis_XP_022777988_1,Spis_XP_022809955_1,Spis_XP_022803780_1,Spis_XP_022805213_1,Spis_XP_022805208_1,Spis_XP_022794757_1,Spis_XP_022805205_1,Spis_XP_022793642_1,Spis_XP_022806738_1,Spis_XP_022803781_1,Spis_XP_022804046_1,Spis_XP_022805568_1,Spis_XP_022809749_1…	Spis-XP-022806742-1,Spis-XP-022777664-1,Spis-XP-022804036-1,Spis-XP-022795546-1,Spis-XP-022795527-1,Spis-XP-022786260-1,Spis-XP-022797648-1,Spis-XP-022777698-1,Spis-XP-022805380-1,Spis-XP-022794479-1,Spis-XP-022786940-1					Hvul_g11902_1
NV2g017169000.1	TRUE	TRUE	Spis_XP_022793067_1,Spis_XP_022807851_1	Spis-XP-022793067-1,Spis-XP-022807851-1		Xesp_005045	Xesp-005045		Hvul_g24336_1	Hvul-g24336-1
NV2g017352000.1	TRUE	TRUE	Spis_XP_022781799_1	Spis-XP-022781799-1
NV2g017353000.1	TRUE	TRUE
NV2g017370000.1	TRUE	TRUE
NV2g017371000.1	TRUE	TRUE
NV2g017392000.1	TRUE	TRUE
NV2g017394000.1	TRUE	TRUE	Spis_XP_022781806_1	Spis-XP-022781806-1	Spis-XP-022781806-1	Xesp_004351	Xesp-004351	Xesp-004351
NV2g017396000.1	TRUE	TRUE	Spis_XP_022781800_1	Spis-XP-022781800-1		Xesp_024455	Xesp-024455	Xesp-024455
NV2g017397000.1	TRUE	TRUE
NV2g017398000.1	TRUE	TRUE
NV2g017400000.1	TRUE	TRUE
NV2g017401000.1	TRUE	TRUE	Spis4205_1
NV2g017402000.1	TRUE	TRUE	Spis_XP_022781686_1	Spis-XP-022781686-1					Hvul_g27634_1	Hvul-g27634-1	Hvul-g27634-1
NV2g017517000.1	TRUE	TRUE	Spis_XP_022796619_1	Spis-XP-022796619-1					Hvul_g5003_1,Hvul_g6549_1	Hvul-g5003-1,Hvul-g6549-1	Hvul-g6549-1
NV2g017518000.1	TRUE	TRUE
NV2g017558000.1	TRUE	TRUE
NV2g017608000.1	TRUE	TRUE
NV2g017612000.1	TRUE	TRUE	Spis_XP_022797366_1	Spis-XP-022797366-1		Xesp_003962	Xesp-003962		Hvul_g12885_1	Hvul-g12885-1	Hvul-g12885-1
NV2g017614000.1	TRUE	TRUE	Spis_XP_022781979_1	Spis-XP-022781979-1		Xesp_024872	Xesp-024872		Hvul_g4954_1	Hvul-g4954-1	Hvul-g4954-1
NV2g017615000.1	TRUE	TRUE	Spis_XP_022781979_1	Spis-XP-022781979-1		Xesp_024872	Xesp-024872		Hvul_g4954_1	Hvul-g4954-1	Hvul-g4954-1
NV2g017669000.1	TRUE	TRUE	Spis_XP_022799107_1	Spis-XP-022799107-1
NV2g017723000.1	TRUE	TRUE	Spis_XP_022785697_1	Spis-XP-022785697-1					Hvul_g9576_1	Hvul-g9576-1
NV2g017807000.1	TRUE	TRUE
NV2g017826000.1	TRUE	TRUE	Spis_XP_022796633_1
NV2g017827000.1	TRUE	TRUE	Spis_XP_022796627_1
NV2g017877000.1	TRUE	TRUE	Spis_XP_022789364_1			Xesp_002190,Xesp_013530,Xesp_022393	Xesp-002190,Xesp-013530,Xesp-022393	Xesp-013530,Xesp-002190	Hvul_g1924_1	Hvul-g1924-1	Hvul-g1924-1
NV2g017894000.1	TRUE	TRUE
NV2g017968000.1	TRUE	TRUE	Spis_XP_022793767_1,Spis_XP_022793779_1,Spis_XP_022778288_1,Spis_XP_022793815_1,Spis_XP_022793819_1,Spis_XP_022793818_1	Spis-XP-022793819-1		Xesp_006167,Xesp_006173,Xesp_026565	Xesp-026565		Hvul_g203_1	Hvul-g203-1	Hvul-g203-1
NV2g018002000.1	TRUE	TRUE
NV2g018023000.1	TRUE	TRUE	Spis_XP_022780041_1			Xesp_001951	Xesp-001951
NV2g018052000.1	TRUE	TRUE	Spis_XP_022790872_1	Spis-XP-022790872-1		Xesp_027227	Xesp-027227	Xesp-027227	Hvul_g11680_1,Hvul_g31780_1	Hvul-g11680-1,Hvul-g31780-1	Hvul-g11680-1
NV2g018067000.1	TRUE	TRUE	Spis_XP_022790852_1	Spis-XP-022790852-1		Xesp_026747,Xesp_026749,Xesp_027095	Xesp-026747,Xesp-026749,Xesp-027095		Hvul_g20469_1	Hvul-g20469-1	Hvul-g20469-1
NV2g018075000.1	TRUE	TRUE
NV2g018076000.1	TRUE	TRUE
NV2g018077000.1	TRUE	TRUE	Spis_XP_022789330_1	Spis-XP-022789330-1		Xesp_013693	Xesp-013693	Xesp-013693
NV2g018119000.1	TRUE	TRUE	Spis_XP_022792980_1			Xesp_021998,Xesp_024999	Xesp-021998,Xesp-024999	Xesp-024999	Hvul_g7830_1	Hvul-g7830-1
NV2g018175000.1	TRUE	TRUE
NV2g018176000.1	TRUE	TRUE	Spis_XP_022784946_1,Spis_XP_022784961_1	Spis-XP-022784961-1
NV2g018299000.1	TRUE	TRUE	Spis_XP_022797174_1	Spis-XP-022797174-1					Hvul_g27977_1	Hvul-g27977-1	Hvul-g27977-1
NV2g018307000.1	TRUE	TRUE
NV2g018344000.1	TRUE	TRUE	Spis_XP_022803956_1	Spis-XP-022803956-1		Xesp_013713,Xesp_023978	Xesp-013713,Xesp-023978	Xesp-013713	Hvul_g11062_1,Hvul_g3594_1	Hvul-g11062-1,Hvul-g3594-1	Hvul-g11062-1
NV2g018358000.1	TRUE	TRUE
NV2g018394000.1	TRUE	TRUE	Spis_XP_022783654_1			Xesp_013893	Xesp-013893
NV2g018479000.1	TRUE	TRUE
NV2g018480000.1	TRUE	TRUE	Spis_XP_022779382_1,Spis_XP_022779439_1	Spis-XP-022779382-1,Spis-XP-022779439-1	Spis-XP-022779439-1,Spis-XP-022779382-1	Xesp_013729,Xesp_013732,Xesp_013738,Xesp_013715,Xesp_013730	Xesp-013729,Xesp-013732,Xesp-013738,Xesp-013715,Xesp-013730	Xesp-013715,Xesp-013732,Xesp-013738,Xesp-013729,Xesp-013730	Hvul_g19153_1	Hvul-g19153-1	Hvul-g19153-1
NV2g018482000.1	TRUE	TRUE	Spis_XP_022779440_1						Hvul_g23666_1	Hvul-g23666-1	Hvul-g23666-1
NV2g018560000.1	TRUE	TRUE	Spis_XP_022782374_1			Xesp_021766	Xesp-021766	Xesp-021766	Hvul_g28169_1	Hvul-g28169-1	Hvul-g28169-1
NV2g018584000.1	TRUE	TRUE	Spis_XP_022800080_1	Spis-XP-022800080-1		Xesp_013713,Xesp_023978	Xesp-013713,Xesp-023978	Xesp-013713	Hvul_g11062_1,Hvul_g3594_1	Hvul-g11062-1,Hvul-g3594-1	Hvul-g11062-1
NV2g018585000.1	TRUE	TRUE	Spis_XP_022800114_1	Spis-XP-022800114-1	Spis-XP-022800114-1	Xesp_013651	Xesp-013651	Xesp-013651	Hvul_g11872_1	Hvul-g11872-1	Hvul-g11872-1
NV2g018599000.1	TRUE	TRUE	Spis_XP_022782319_1	Spis-XP-022782319-1		Xesp_002199	Xesp-002199	Xesp-002199	Hvul_g28168_1	Hvul-g28168-1	Hvul-g28168-1
NV2g018609000.1	TRUE	TRUE	Spis_XP_022781808_1	Spis-XP-022781808-1
NV2g018625000.1	TRUE	TRUE
NV2g018639000.1	TRUE	TRUE	Spis_XP_022787692_1,Spis_XP_022790853_1	Spis-XP-022787692-1
NV2g018751000.1	TRUE	TRUE	Spis_XP_022790460_1	Spis-XP-022790460-1	Spis-XP-022790460-1	Xesp_013142,Xesp_013145	Xesp-013142,Xesp-013145	Xesp-013142	Hvul_g27102_1	Hvul-g27102-1	Hvul-g27102-1
NV2g018752000.1	TRUE	FALSE	Spis_XP_022782308_1,Spis25132_1,Spis_XP_022782377_1,Spis4559_1,Spis_XP_022782317_1,Spis_XP_022782410_1,Spis_XP_022782199_1,Spis_XP_022782211_1,Spis18827_1,Spis_XP_022794532_1,Spis_XP_022799945_1,Spis18099_1,Spis_XP_022803302_1,Spis_XP_022803309_1,Spis22364_1,Spis22363_1,Spis_XP_022810116_1	Spis-XP-022782211-1,Spis18827-1		Xesp_015538,Xesp_015530,Xesp_015345,Xesp_015533,Xesp_015535,Xesp_015536,Xesp_015539,Xesp_015540,Xesp_015537,Xesp_015532,Xesp_015531,Xesp_015344,Xesp_015534	Xesp-015539,Xesp-015532,Xesp-015531,Xesp-015534		Hvul_g6963_1	Hvul-g6963-1	Hvul-g6963-1
NV2g018772000.1	TRUE	TRUE	Spis_XP_022797756_1			Xesp_013057,Xesp_013817,Xesp_014840,Xesp_014844,Xesp_013818,Xesp_014842,Xesp_013059,Xesp_013060,Xesp_013063,Xesp_013058,Xesp_013061	Xesp-013057,Xesp-013817,Xesp-014840,Xesp-013818,Xesp-014842,Xesp-013059,Xesp-013060,Xesp-013063,Xesp-013058	Xesp-013058,Xesp-013059	Hvul_g3099_1,Hvul_g8314_1,Hvul_g17246_1,Hvul_g33211_1	Hvul-g3099-1,Hvul-g8314-1,Hvul-g17246-1,Hvul-g33211-1	Hvul-g17246-1
NV2g018783000.1	TRUE	TRUE	Spis_XP_022790471_1	Spis-XP-022790471-1	Spis-XP-022790471-1	Xesp_013904	Xesp-013904	Xesp-013904	Hvul_g24398_1	Hvul-g24398-1	Hvul-g24398-1
NV2g018784000.1	TRUE	FALSE	Spis_XP_022804865_1,Spis_XP_022804884_1,Spis_XP_022802893_1			Xesp_002245,Xesp_002244	Xesp-002245,Xesp-002244		Hvul_g31826_1,Hvul_g31824_1,Hvul_g31823_1,Hvul_g282_1,Hvul_g22792_1,Hvul_g2677_1,Hvul_g2679_1	Hvul-g31826-1,Hvul-g31824-1,Hvul-g31823-1,Hvul-g22792-1	Hvul-g31823-1,Hvul-g31826-1
NV2g018786000.1	TRUE	TRUE	Spis_XP_022797012_1			Xesp_013904	Xesp-013904	Xesp-013904	Hvul_g24398_1	Hvul-g24398-1	Hvul-g24398-1
NV2g018792000.1	TRUE	TRUE	Spis_XP_022784667_1
NV2g018831000.1	TRUE	TRUE	Spis_XP_022781943_1	Spis-XP-022781943-1
NV2g018846000.1	TRUE	TRUE	Spis_XP_022779074_1			Xesp_013844	Xesp-013844
NV2g018856000.1	TRUE	TRUE	Spis_XP_022805062_1	Spis-XP-022805062-1		Xesp_013939	Xesp-013939	Xesp-013939	Hvul_g18711_1	Hvul-g18711-1	Hvul-g18711-1
NV2g018912000.1	TRUE	FALSE	Spis_XP_022786344_1,Spis_XP_022786346_1
NV2g019081000.1	TRUE	TRUE
NV2g019110000.1	TRUE	TRUE	Spis_XP_022801470_1
NV2g019339000.1	TRUE	TRUE	Spis_XP_022803299_1	Spis-XP-022803299-1					Hvul_g11124_1	Hvul-g11124-1	Hvul-g11124-1
NV2g019340000.1	TRUE	TRUE	Spis_XP_022803298_1						Hvul_g21606_1,Hvul_g23720_1	Hvul-g21606-1,Hvul-g23720-1	Hvul-g21606-1,Hvul-g23720-1
NV2g019366000.1	TRUE	TRUE	Spis_XP_022800810_1,Spis_XP_022807363_1	Spis-XP-022807363-1	Spis-XP-022807363-1				Hvul_g6860_1	Hvul-g6860-1	Hvul-g6860-1
NV2g019367000.1	TRUE	TRUE
NV2g019368000.1	TRUE	TRUE
NV2g019509000.1	TRUE	TRUE	Spis_XP_022788003_1						Hvul_g19302_1	Hvul-g19302-1	Hvul-g19302-1
NV2g019739000.1	TRUE	TRUE	Spis_XP_022779878_1,Spis_XP_022783434_1,Spis_XP_022791964_1,Spis5670_1,Spis_XP_022796452_1,Spis_XP_022796441_1,Spis_XP_022809279_1,Spis21749_1,Spis17599_1,Spis21425_1,Spis5964_1,Spis21304_1	Spis17599-1,Spis21304-1		Xesp_026120
NV2g019745000.1	TRUE	TRUE
NV2g019753000.1	TRUE	TRUE	Spis_XP_022798422_1	Spis-XP-022798422-1
NV2g019762000.1	TRUE	FALSE
NV2g019770000.1	TRUE	TRUE	Spis_XP_022787151_1						Hvul_g10105_1,Hvul_g13520_1	Hvul-g13520-1	Hvul-g13520-1
NV2g019779000.1	TRUE	TRUE	Spis_XP_022782286_1						Hvul_g14775_1	Hvul-g14775-1
NV2g019840000.1	TRUE	TRUE
NV2g020021000.1	TRUE	TRUE	Spis_XP_022807685_1			Xesp_011800,Xesp_011801	Xesp-011800,Xesp-011801	Xesp-011801,Xesp-011800
NV2g020023000.1	TRUE	TRUE
NV2g020036000.1	TRUE	TRUE	Spis_XP_022808298_1						Hvul_g19302_1	Hvul-g19302-1	Hvul-g19302-1
NV2g020119000.1	TRUE	TRUE	Spis_XP_022800456_1			Xesp_023597,Xesp_015090,Xesp_008874,Xesp_009465,Xesp_007002,Xesp_015089,Xesp_010893,Xesp_015088	Xesp-023597,Xesp-015090,Xesp-009465,Xesp-007002,Xesp-015089,Xesp-010893,Xesp-015088	Xesp-023597	Hvul_g1483_1	Hvul-g1483-1
NV2g020208000.1	TRUE	TRUE	Spis_XP_022787208_1	Spis-XP-022787208-1		Xesp_001056	Xesp-001056	Xesp-001056	Hvul_g19302_1	Hvul-g19302-1	Hvul-g19302-1
NV2g020209000.1	TRUE	TRUE
NV2g020210000.1	TRUE	TRUE
NV2g020240000.1	TRUE	TRUE	Spis_XP_022783301_1	Spis-XP-022783301-1		Xesp_011929			Hvul_g30176_1	Hvul-g30176-1	Hvul-g30176-1
NV2g020267000.1	TRUE	TRUE	Spis_XP_022794368_1
NV2g020276000.1	TRUE	TRUE
NV2g020321000.1	TRUE	TRUE
NV2g020322000.1	TRUE	TRUE	Spis_XP_022807681_1			Xesp_004640	Xesp-004640	Xesp-004640	Hvul_g23207_1
NV2g020323000.1	TRUE	TRUE	Spis_XP_022807681_1			Xesp_004640	Xesp-004640	Xesp-004640	Hvul_g23207_1
NV2g020460000.1	TRUE	TRUE	Spis_XP_022810359_1	Spis-XP-022810359-1					Hvul_g2840_1	Hvul-g2840-1
NV2g020489000.1	TRUE	TRUE
NV2g020490000.1	TRUE	TRUE
NV2g020492000.1	TRUE	TRUE
NV2g020519000.1	TRUE	TRUE
NV2g020520000.1	TRUE	TRUE	Spis_XP_022808299_1			Xesp_022088,Xesp_026603,Xesp_026907,Xesp_026923	Xesp-022088,Xesp-026907,Xesp-026923	Xesp-022088	Hvul_g19302_1	Hvul-g19302-1	Hvul-g19302-1
NV2g020521000.1	TRUE	TRUE				Xesp_022088,Xesp_026603,Xesp_026907,Xesp_026923	Xesp-022088,Xesp-026907,Xesp-026923	Xesp-022088	Hvul_g19302_1	Hvul-g19302-1	Hvul-g19302-1
NV2g020636000.1	TRUE	TRUE	Spis_XP_022782280_1			Xesp_001056	Xesp-001056	Xesp-001056	Hvul_g19302_1	Hvul-g19302-1	Hvul-g19302-1
NV2g020678000.1	TRUE	TRUE
NV2g020737000.1	TRUE	TRUE	Spis_XP_022803498_1	Spis-XP-022803498-1	Spis-XP-022803498-1				Hvul_g18935_1	Hvul-g18935-1
NV2g020815000.1	TRUE	TRUE	Spis_XP_022786216_1	Spis-XP-022786216-1		Xesp_004792	Xesp-004792
NV2g020819000.1	TRUE	TRUE	Spis_XP_022803490_1	Spis-XP-022803490-1
NV2g020837000.1	TRUE	TRUE	Spis_XP_022792489_1,Spis_XP_022785645_1,Spis_XP_022806907_1	Spis-XP-022806907-1		Xesp_021657	Xesp-021657	Xesp-021657	Hvul_g14111_1	Hvul-g14111-1	Hvul-g14111-1
NV2g020838000.1	TRUE	TRUE	Spis_XP_022792489_1,Spis_XP_022785645_1,Spis_XP_022806907_1	Spis-XP-022806907-1		Xesp_021657	Xesp-021657	Xesp-021657	Hvul_g14111_1	Hvul-g14111-1	Hvul-g14111-1
NV2g020840000.1	TRUE	TRUE
NV2g020849000.1	TRUE	TRUE	Spis_XP_022777452_1			Xesp_000967	Xesp-000967
NV2g020870000.1	TRUE	TRUE
NV2g020884000.1	TRUE	TRUE	Spis_XP_022782276_1			Xesp_011817	Xesp-011817
NV2g021053000.1	TRUE	TRUE	Spis_XP_022787201_1	Spis-XP-022787201-1	Spis-XP-022787201-1	Xesp_005913,Xesp_005923	Xesp-005913,Xesp-005923	Xesp-005923	Hvul_g11766_1	Hvul-g11766-1	Hvul-g11766-1
NV2g021109000.1	TRUE	TRUE	Spis_XP_022779444_1						Hvul_g30674_1	Hvul-g30674-1	Hvul-g30674-1
NV2g021272000.1	TRUE	TRUE
NV2g021273000.1	TRUE	TRUE
NV2g021292000.1	TRUE	TRUE	Spis_XP_022779081_1,Spis_XP_022793116_1			Xesp_002081	Xesp-002081		Hvul_g15442_1	Hvul-g15442-1
NV2g021330000.1	TRUE	TRUE	Spis_XP_022801117_1,Spis_XP_022801125_1	Spis-XP-022801117-1	Spis-XP-022801117-1	Xesp_015581	Xesp-015581	Xesp-015581
NV2g021461000.1	TRUE	TRUE
NV2g021578000.1	TRUE	TRUE	Spis_XP_022796156_1
NV2g021582000.1	TRUE	TRUE	Spis_XP_022798055_1	Spis-XP-022798055-1	Spis-XP-022798055-1	Xesp_014152	Xesp-014152	Xesp-014152	Hvul_g27319_1	Hvul-g27319-1	Hvul-g27319-1
NV2g021600000.1	TRUE	TRUE	Spis_XP_022792524_1
NV2g021667000.1	TRUE	TRUE	Spis_XP_022788532_1,Spis_XP_022799924_1			Xesp_012330	Xesp-012330		Hvul_g30398_1,Hvul_g17979_1,Hvul_g17998_1,Hvul_g17988_1,Hvul_g33090_1,Hvul_g17982_1,Hvul_g17983_1,Hvul_g17992_1,Hvul_g6857_1,Hvul_g17984_1,Hvul_g17991_1	Hvul-g30398-1,Hvul-g17979-1,Hvul-g17998-1,Hvul-g17988-1,Hvul-g33090-1,Hvul-g17982-1,Hvul-g17983-1,Hvul-g17992-1,Hvul-g6857-1,Hvul-g17984-1,Hvul-g17991-1	Hvul-g6857-1,Hvul-g17998-1,Hvul-g30398-1,Hvul-g17979-1,Hvul-g33090-1,Hvul-g17983-1,Hvul-g17982-1
NV2g021939000.1	TRUE	TRUE	Spis_XP_022793201_1	Spis-XP-022793201-1
NV2g021976000.1	TRUE	TRUE	Spis_XP_022793215_1			Xesp_014655	Xesp-014655	Xesp-014655	Hvul_g22711_1,Hvul_g12375_1,Hvul_g12378_1	Hvul-g22711-1,Hvul-g12375-1,Hvul-g12378-1	Hvul-g22711-1
NV2g021990000.1	TRUE	TRUE	Spis_XP_022783541_1			Xesp_020953	Xesp-020953	Xesp-020953
NV2g021995000.1	TRUE	TRUE
NV2g022004000.1	TRUE	TRUE
NV2g022056000.1	TRUE	FALSE
NV2g022091000.1	TRUE	FALSE	Spis_XP_022779878_1,Spis_XP_022783434_1,Spis_XP_022791964_1,Spis5670_1,Spis_XP_022796452_1,Spis_XP_022796441_1,Spis_XP_022809279_1,Spis21749_1,Spis17599_1,Spis21425_1,Spis5964_1,Spis21304_1	Spis17599-1,Spis21304-1		Xesp_026120
NV2g022104000.1	TRUE	TRUE	Spis_XP_022786418_1			Xesp_017666,Xesp_024506			Hvul_g11162_1
NV2g022126000.1	TRUE	TRUE	Spis_XP_022788668_1			Xesp_014894	Xesp-014894	Xesp-014894	Hvul_g33146_1,Hvul_g25259_1,Hvul_g33141_1,Hvul_g20359_1,Hvul_g20360_1	Hvul-g33146-1,Hvul-g25259-1,Hvul-g20360-1	Hvul-g25259-1
NV2g022154000.1	TRUE	TRUE
NV2g022155000.1	TRUE	TRUE	Spis_XP_022798423_1	Spis-XP-022798423-1		Xesp_022398	Xesp-022398	Xesp-022398	Hvul_g29951_1	Hvul-g29951-1	Hvul-g29951-1
NV2g022228000.1	TRUE	TRUE	Spis_XP_022779122_1	Spis-XP-022779122-1		Xesp_014851	Xesp-014851	Xesp-014851
NV2g022278000.1	TRUE	TRUE
NV2g022291000.1	TRUE	TRUE	Spis_XP_022798251_1	Spis-XP-022798251-1		Xesp_014684	Xesp-014684	Xesp-014684
NV2g022296000.1	TRUE	TRUE	Spis_XP_022808791_1	Spis-XP-022808791-1					Hvul_g17288_1,Hvul_g849_1,Hvul_g6064_1,Hvul_g6065_1	Hvul-g17288-1,Hvul-g849-1,Hvul-g6064-1,Hvul-g6065-1	Hvul-g17288-1,Hvul-g849-1,Hvul-g6065-1
NV2g022406000.1	FALSE	FALSE
NV2g022446000.1	TRUE	TRUE	Spis_XP_022788891_1	Spis-XP-022788891-1	Spis-XP-022788891-1	Xesp_003070	Xesp-003070	Xesp-003070
NV2g022447000.1	TRUE	TRUE
NV2g022448000.1	TRUE	TRUE	Spis_XP_022788891_1	Spis-XP-022788891-1	Spis-XP-022788891-1	Xesp_003070	Xesp-003070	Xesp-003070
NV2g022451000.1	TRUE	TRUE	Spis_XP_022788934_1,Spis_XP_022788954_1
NV2g022452000.1	TRUE	TRUE							Hvul_g25748_1	Hvul-g25748-1	Hvul-g25748-1
NV2g022507000.1	TRUE	TRUE	Spis_XP_022805275_1	Spis-XP-022805275-1		Xesp_014486	Xesp-014486	Xesp-014486	Hvul_g10484_1	Hvul-g10484-1
NV2g022546000.1	TRUE	FALSE
NV2g022650000.1	TRUE	FALSE	Spis_XP_022792993_1			Xesp_014650	Xesp-014650		Hvul_g18956_1	Hvul-g18956-1
NV2g022721000.1	TRUE	TRUE	Spis_XP_022801132_1	Spis-XP-022801132-1
NV2g022722000.1	TRUE	TRUE
NV2g022756000.1	TRUE	TRUE	Spis_XP_022792981_1	Spis-XP-022792981-1					Hvul_g19291_1	Hvul-g19291-1	Hvul-g19291-1
NV2g022954000.1	TRUE	TRUE
NV2g022956000.1	TRUE	TRUE
NV2g023070000.1	TRUE	TRUE							Hvul_g31349_1
NV2g023095000.1	TRUE	TRUE	Spis_XP_022779792_1			Xesp_002042	Xesp-002042	Xesp-002042	Hvul_g4581_1	Hvul-g4581-1	Hvul-g4581-1
NV2g023129000.1	TRUE	TRUE							Hvul_g31349_1
NV2g023131000.1	TRUE	TRUE	Spis_XP_022780365_1			Xesp_021361	Xesp-021361	Xesp-021361	Hvul_g25118_1	Hvul-g25118-1
NV2g023164000.1	TRUE	TRUE	Spis_XP_022779334_1	Spis-XP-022779334-1
NV2g023185000.1	TRUE	TRUE	Spis_XP_022789019_1			Xesp_014808	Xesp-014808	Xesp-014808	Hvul_g25872_1	Hvul-g25872-1	Hvul-g25872-1
NV2g023246000.1	TRUE	TRUE
NV2g023247000.1	TRUE	TRUE	Spis_XP_022808266_1	Spis-XP-022808266-1	Spis-XP-022808266-1
NV2g023248000.1	TRUE	TRUE	Spis_XP_022796338_1						Hvul_g29944_1	Hvul-g29944-1	Hvul-g29944-1
NV2g023378000.1	TRUE	TRUE
NV2g023379000.1	FALSE	FALSE
NV2g023423000.1	TRUE	TRUE
NV2g023451000.1	TRUE	TRUE	Spis_XP_022787075_1			Xesp_002199	Xesp-002199	Xesp-002199	Hvul_g28168_1	Hvul-g28168-1	Hvul-g28168-1
NV2g023471000.1	TRUE	TRUE	Spis_XP_022785437_1
NV2g023613000.1	TRUE	TRUE	Spis_XP_022785006_1	Spis-XP-022785006-1		Xesp_002184	Xesp-002184	Xesp-002184	Hvul_g25884_1	Hvul-g25884-1	Hvul-g25884-1
NV2g023619000.1	TRUE	TRUE	Spis_XP_022799523_1			Xesp_003109	Xesp-003109	Xesp-003109
NV2g023627000.1	TRUE	TRUE
NV2g023628000.1	TRUE	TRUE
NV2g023668000.1	TRUE	TRUE	Spis_XP_022783839_1	Spis-XP-022783839-1		Xesp_023281	Xesp-023281	Xesp-023281	Hvul_g7059_1	Hvul-g7059-1	Hvul-g7059-1
NV2g023839000.1	TRUE	TRUE	Spis_XP_022784891_1			Xesp_002961	Xesp-002961	Xesp-002961	Hvul_g4955_1	Hvul-g4955-1
NV2g023844000.1	TRUE	TRUE	Spis3387_1			Xesp_002093	Xesp-002093	Xesp-002093
NV2g023846000.1	TRUE	TRUE	Spis_XP_022786306_1,Spis_XP_022791331_1	Spis-XP-022791331-1
NV2g023901000.1	TRUE	TRUE
NV2g023902000.1	TRUE	TRUE
NV2g023907000.1	TRUE	TRUE
NV2g023986000.1	TRUE	TRUE
NV2g024302000.1	TRUE	TRUE	Spis_XP_022780441_1	Spis-XP-022780441-1	Spis-XP-022780441-1	Xesp_002943	Xesp-002943	Xesp-002943	Hvul_g15825_1	Hvul-g15825-1	Hvul-g15825-1
NV2g024332000.1	TRUE	TRUE	Spis_XP_022790142_1	Spis-XP-022790142-1		Xesp_007435	Xesp-007435	Xesp-007435
NV2g024334000.1	TRUE	TRUE	Spis_XP_022790136_1	Spis-XP-022790136-1	Spis-XP-022790136-1
NV2g024348000.1	TRUE	TRUE	Spis_XP_022790177_1,Spis_XP_022790166_1	Spis-XP-022790177-1,Spis-XP-022790166-1		Xesp_007437	Xesp-007437	Xesp-007437	Hvul_g23500_1,Hvul_g14975_1,Hvul_g14976_1	Hvul-g23500-1,Hvul-g14975-1	Hvul-g23500-1,Hvul-g14975-1
NV2g024349000.1	TRUE	TRUE
NV2g024354000.1	TRUE	TRUE
NV2g024356000.1	TRUE	TRUE
NV2g024357000.1	TRUE	FALSE
NV2g024359000.1	TRUE	TRUE	Spis_XP_022790152_1	Spis-XP-022790152-1		Xesp_007395	Xesp-007395	Xesp-007395
NV2g024360000.1	TRUE	TRUE	Spis_XP_022790154_1	Spis-XP-022790154-1		Xesp_007351,Xesp_007392,Xesp_007352,Xesp_001401	Xesp-007351,Xesp-007392,Xesp-007352
NV2g024362000.1	TRUE	TRUE
NV2g024375000.1	TRUE	TRUE	Spis_XP_022793353_1	Spis-XP-022793353-1		Xesp_008243	Xesp-008243
NV2g024424000.1	TRUE	TRUE
NV2g024489000.1	TRUE	TRUE
NV2g024508000.1	TRUE	TRUE	Spis15796_1
NV2g024533000.1	TRUE	TRUE
NV2g024561000.1	TRUE	TRUE	Spis_XP_022790177_1,Spis_XP_022790166_1	Spis-XP-022790177-1,Spis-XP-022790166-1		Xesp_007437	Xesp-007437	Xesp-007437	Hvul_g23500_1,Hvul_g14975_1,Hvul_g14976_1	Hvul-g23500-1,Hvul-g14975-1	Hvul-g23500-1,Hvul-g14975-1
NV2g024598000.1	TRUE	TRUE
NV2g024630000.1	TRUE	TRUE
NV2g024631000.1	TRUE	TRUE	Spis_XP_022795263_1
NV2g024774000.1	TRUE	TRUE
NV2g024811000.1	TRUE	TRUE
NV2g024826000.1	TRUE	TRUE	Spis_XP_022809884_1			Xesp_008279	Xesp-008279	Xesp-008279	Hvul_g2282_1	Hvul-g2282-1	Hvul-g2282-1
NV2g024850000.1	TRUE	TRUE	Spis_XP_022789635_1
NV2g024893000.1	TRUE	TRUE	Spis_XP_022783830_1	Spis-XP-022783830-1					Hvul_g6779_1	Hvul-g6779-1
NV2g024894000.1	TRUE	TRUE
NV2g024951000.1	TRUE	TRUE	Spis_XP_022796794_1	Spis-XP-022796794-1		Xesp_008312,Xesp_023837,Xesp_028721	Xesp-008312,Xesp-023837	Xesp-023837	Hvul_g27153_1	Hvul-g27153-1
NV2g024990000.1	TRUE	FALSE
NV2g024993000.1	TRUE	TRUE	Spis_XP_022786019_1
NV2g025130000.1	TRUE	TRUE	Spis_XP_022783793_1	Spis-XP-022783793-1		Xesp_008888	Xesp-008888	Xesp-008888	Hvul_g18192_1	Hvul-g18192-1	Hvul-g18192-1
NV2g025253000.1	TRUE	FALSE	Spis_XP_022806518_1	Spis-XP-022806518-1
NV2g025254000.1	TRUE	TRUE
NV2g025327000.1	TRUE	TRUE	Spis_XP_022789660_1			Xesp_008321	Xesp-008321		Hvul_g15719_1	Hvul-g15719-1
NV2g025337000.1	TRUE	TRUE	Spis_XP_022783754_1
NV2g025338000.1	TRUE	TRUE	Spis_XP_022783752_1	Spis-XP-022783752-1	Spis-XP-022783752-1
NV2g025428000.1	TRUE	TRUE	Spis_XP_022797180_1	Spis-XP-022797180-1		Xesp_007921	Xesp-007921
NV2g025537000.1	TRUE	TRUE	Spis_XP_022787629_1,Spis_XP_022787578_1			Xesp_011967	Xesp-011967		Hvul_g23895_1,Hvul_g17306_1,Hvul_g11146_1,Hvul_g17307_1,Hvul_g13304_1,Hvul_g13777_1,Hvul_g22892_1,Hvul_g22894_1,Hvul_g30909_1,Hvul_g18997_1,Hvul_g21173_1,Hvul_g7416_1,Hvul_g17765_1,Hvul_g24550_1
NV2g025612000.1	TRUE	TRUE	Spis_XP_022787895_1
NV2g025694000.1	TRUE	TRUE
NV2g025696000.1	TRUE	TRUE
NV2g025707000.1	TRUE	TRUE	Spis_XP_022794321_1
NV2g025714000.1	TRUE	TRUE				Xesp_008166	Xesp-008166		Hvul_g13384_1	Hvul-g13384-1
NV2g025947000.1	FALSE	FALSE	Spis_XP_022785817_1

## Sheet: znf845_paxA
Nv_protein_ID	Nv_cnidocyte_expr(>0.3)	Nv_cnidocyte_marker_gene	Sp_ortholog	Sp_ortholog_cnidocyte_expr(>0.3)	Sp_ortholog_cnidocyte_marker_gene	Xe_ortholog	Xe_ortholog_cnidocyte_expr(>0.3)	Xe_ortholog_cnidocyte_marker_gene	Hv_ortholog	Hv_ortholog_cnidocyte_expr(>0.3)	Hv_ortholog_cnidocyte_marker_gene
NV2g000918000.1	TRUE	TRUE	Spis_XP_022800286_1	Spis-XP-022800286-1		Xesp_016524	Xesp-016524
NV2g001044000.1	TRUE	TRUE	Spis_XP_022779009_1,Spis_XP_022779072_1,Spis_XP_022780676_1,Spis_XP_022796665_1	Spis-XP-022779009-1,Spis-XP-022796665-1	Spis-XP-022796665-1
NV2g001420000.1	TRUE	TRUE
NV2g001762000.1	TRUE	TRUE	Spis_XP_022784605_1	Spis-XP-022784605-1												Orthologs	exp. Cnidocytes
NV2g001924000.1	TRUE	TRUE													Stylophora	61	30
NV2g001925000.1	TRUE	TRUE	Spis_XP_022798792_1	Spis-XP-022798792-1		Xesp_004955	Xesp-004955	Xesp-004955	Hvul_g184_1	Hvul-g184-1					Xenia	38	38
NV2g002801000.1	TRUE	TRUE													Hydra vulgaris	41	39
NV2g003157000.1	TRUE	TRUE
NV2g003261000.1	TRUE	TRUE	Spis_XP_022800707_1
NV2g003342000.1	TRUE	TRUE
NV2g003648000.1	TRUE	TRUE	Spis_XP_022799083_1,Spis_XP_022778961_1,Spis_XP_022778337_1,Spis_XP_022780014_1	Spis-XP-022778337-1
NV2g003676000.1	TRUE	TRUE	Spis_XP_022795626_1,Spis_XP_022793430_1	Spis-XP-022793430-1		Xesp_004950,Xesp_004951	Xesp-004950,Xesp-004951		Hvul_g11466_1,Hvul_g3317_1	Hvul-g11466-1,Hvul-g3317-1	Hvul-g11466-1,Hvul-g3317-1
NV2g003951000.1	TRUE	TRUE	Spis_XP_022803960_1
NV2g004020000.1	TRUE	FALSE
NV2g004448000.1	TRUE	TRUE
NV2g004791000.1	TRUE	TRUE
NV2g004792000.1	TRUE	TRUE
NV2g004963000.1	TRUE	TRUE
NV2g005160000.1	TRUE	TRUE	Spis_XP_022790056_1			Xesp_005393,Xesp_005390,Xesp_011018	Xesp-005393,Xesp-005390	Xesp-005390	Hvul_g1012_1,Hvul_g1011_1,Hvul_g1013_1	Hvul-g1012-1,Hvul-g1011-1,Hvul-g1013-1	Hvul-g1012-1
NV2g006022000.1	TRUE	TRUE	Spis_XP_022805379_1			Xesp_002863	Xesp-002863	Xesp-002863	Hvul_g24476_1,Hvul_g18299_1,Hvul_g30846_1	Hvul-g24476-1,Hvul-g18299-1,Hvul-g30846-1	Hvul-g24476-1
NV2g006104000.1	TRUE	TRUE
NV2g006106000.1	TRUE	TRUE
NV2g006107000.1	TRUE	TRUE
NV2g006117000.1	TRUE	TRUE	Spis_XP_022806563_1						Hvul_g13578_1	Hvul-g13578-1	Hvul-g13578-1
NV2g006259000.1	TRUE	TRUE	Spis_XP_022808057_1	Spis-XP-022808057-1		Xesp_021391	Xesp-021391	Xesp-021391	Hvul_g2328_1	Hvul-g2328-1	Hvul-g2328-1
NV2g006441000.1	TRUE	TRUE	Spis_XP_022799962_1,Spis_XP_022810610_1	Spis-XP-022799962-1		Xesp_002415,Xesp_002418	Xesp-002415,Xesp-002418	Xesp-002415,Xesp-002418	Hvul_g15668_1	Hvul-g15668-1	Hvul-g15668-1
NV2g006444000.1	TRUE	TRUE
NV2g006480000.1	TRUE	TRUE	Spis_XP_022794989_1			Xesp_010055	Xesp-010055		Hvul_g9379_1,Hvul_g9385_1	Hvul-g9379-1,Hvul-g9385-1
NV2g006685000.1	TRUE	TRUE							Hvul_g21924_1
NV2g006786000.1	TRUE	TRUE	Spis_XP_022801214_1	Spis-XP-022801214-1	Spis-XP-022801214-1	Xesp_002547	Xesp-002547	Xesp-002547	Hvul_g2461_1	Hvul-g2461-1	Hvul-g2461-1
NV2g006950000.1	TRUE	TRUE	Spis_XP_022778891_1,Spis_XP_022799024_1,Spis_XP_022810038_1	Spis-XP-022778891-1,Spis-XP-022799024-1,Spis-XP-022810038-1	Spis-XP-022810038-1	Xesp_014540,Xesp_014805,Xesp_009514,Xesp_009511,Xesp_009513,Xesp_015404	Xesp-014540,Xesp-014805,Xesp-009514,Xesp-009511,Xesp-009513	Xesp-009514,Xesp-009511,Xesp-009513	Hvul_g13166_1,Hvul_g27117_1	Hvul-g13166-1,Hvul-g27117-1	Hvul-g27117-1,Hvul-g13166-1
NV2g007011000.1	TRUE	TRUE	Spis_XP_022778891_1,Spis_XP_022799024_1,Spis_XP_022810038_1	Spis-XP-022778891-1,Spis-XP-022799024-1,Spis-XP-022810038-1	Spis-XP-022810038-1	Xesp_014540,Xesp_014805,Xesp_009514,Xesp_009511,Xesp_009513,Xesp_015404	Xesp-014540,Xesp-014805,Xesp-009514,Xesp-009511,Xesp-009513	Xesp-009514,Xesp-009511,Xesp-009513	Hvul_g13166_1,Hvul_g27117_1	Hvul-g13166-1,Hvul-g27117-1	Hvul-g27117-1,Hvul-g13166-1
NV2g007208000.1	TRUE	TRUE
NV2g007975000.1	TRUE	TRUE	Spis_XP_022785124_1,Spis_XP_022785146_1						Hvul_g28577_1,Hvul_g28591_1,Hvul_g28578_1,Hvul_g28574_1,Hvul_g28599_1,Hvul_g28570_1,Hvul_g28598_1,Hvul_g28571_1,Hvul_g28597_1,Hvul_g28601_1	Hvul-g28591-1,Hvul-g28578-1,Hvul-g28574-1,Hvul-g28599-1,Hvul-g28570-1,Hvul-g28601-1
NV2g008412000.1	TRUE	TRUE
NV2g008413000.1	TRUE	TRUE	Spis_XP_022795302_1			Xesp_016731,Xesp_016842,Xesp_016743,Xesp_016637,Xesp_016786,Xesp_016725,Xesp_011736,Xesp_011737	Xesp-016842,Xesp-011736,Xesp-011737		Hvul_g31412_1	Hvul-g31412-1	Hvul-g31412-1
NV2g008633000.1	TRUE	TRUE	Spis_XP_022785540_1
NV2g008635000.1	TRUE	TRUE	Spis_XP_022792982_1,Spis_XP_022782192_1	Spis-XP-022792982-1					Hvul_g31412_1	Hvul-g31412-1	Hvul-g31412-1
NV2g008766000.1	TRUE	TRUE	Spis_XP_022780849_1,Spis_XP_022780948_1,Spis_XP_022808681_1,Spis_XP_022799382_1,Spis_XP_022806391_1,Spis_XP_022797016_1			Xesp_025156,Xesp_029011	Xesp-025156,Xesp-029011		Hvul_g14112_1	Hvul-g14112-1	Hvul-g14112-1
NV2g009649000.1	TRUE	TRUE
NV2g009650000.1	TRUE	TRUE
NV2g009737000.1	TRUE	TRUE
NV2g009738000.1	TRUE	TRUE
NV2g009748000.1	TRUE	TRUE
NV2g009990000.1	TRUE	TRUE
NV2g010077000.1	TRUE	TRUE	Spis_XP_022780819_1	Spis-XP-022780819-1	Spis-XP-022780819-1	Xesp_008625	Xesp-008625	Xesp-008625	Hvul_g19772_1,Hvul_g19773_1	Hvul-g19773-1	Hvul-g19773-1
NV2g010139000.1	TRUE	TRUE	Spis_XP_022799083_1,Spis_XP_022778961_1,Spis_XP_022778337_1,Spis_XP_022780014_1	Spis-XP-022778337-1
NV2g010141000.1	TRUE	TRUE	Spis_XP_022799083_1,Spis_XP_022778961_1,Spis_XP_022778337_1,Spis_XP_022780014_1	Spis-XP-022778337-1
NV2g010196000.1	TRUE	TRUE	Spis23331_1,Spis_XP_022805612_1,Spis23330_1,Spis_XP_022809973_1,Spis_XP_022805615_1,Spis_XP_022797061_1,Spis_XP_022797070_1	Spis23331-1,Spis-XP-022805612-1,Spis23330-1,Spis-XP-022797061-1,Spis-XP-022797070-1
NV2g010248000.1	TRUE	TRUE
NV2g010343000.1	TRUE	TRUE	Spis_XP_022789498_1	Spis-XP-022789498-1	Spis-XP-022789498-1	Xesp_008473	Xesp-008473	Xesp-008473	Hvul_g12820_1	Hvul-g12820-1	Hvul-g12820-1
NV2g010344000.1	TRUE	TRUE
NV2g010349000.1	TRUE	TRUE
NV2g010601000.1	TRUE	TRUE	Spis_XP_022781491_1,Spis_XP_022781483_1	Spis-XP-022781483-1		Xesp_008451	Xesp-008451		Hvul_g6417_1	Hvul-g6417-1	Hvul-g6417-1
NV2g010671000.1	TRUE	TRUE
NV2g010892000.1	TRUE	TRUE	Spis_XP_022788493_1
NV2g011075000.1	TRUE	TRUE
NV2g011117000.1	TRUE	TRUE				Xesp_005641	Xesp-005641
NV2g011665000.1	TRUE	TRUE
NV2g011801000.1	TRUE	TRUE
NV2g011819000.1	TRUE	TRUE
NV2g011824000.1	TRUE	TRUE	Spis_XP_022803627_1	Spis-XP-022803627-1	Spis-XP-022803627-1	Xesp_001279	Xesp-001279	Xesp-001279	Hvul_g5036_1,Hvul_g5035_1	Hvul-g5035-1	Hvul-g5035-1
NV2g012143000.1	TRUE	TRUE
NV2g012144000.1	TRUE	TRUE	Spis_XP_022801930_1	Spis-XP-022801930-1	Spis-XP-022801930-1
NV2g012315000.1	TRUE	TRUE	Spis_XP_022795960_1			Xesp_009734	Xesp-009734	Xesp-009734	Hvul_g14627_1	Hvul-g14627-1
NV2g012533000.1	TRUE	TRUE
NV2g012536000.1	TRUE	FALSE
NV2g012540000.1	TRUE	TRUE	Spis_XP_022788565_1			Xesp_000702	Xesp-000702	Xesp-000702
NV2g012552000.1	TRUE	TRUE	Spis_XP_022800620_1
NV2g012573000.1	TRUE	TRUE	Spis_XP_022782596_1			Xesp_009590	Xesp-009590	Xesp-009590
NV2g012871000.1	TRUE	TRUE	Spis_XP_022782451_1	Spis-XP-022782451-1		Xesp_021423	Xesp-021423		Hvul_g14239_1	Hvul-g14239-1
NV2g013435000.1	TRUE	TRUE
NV2g013586000.1	TRUE	TRUE	Spis1571_1
NV2g013928000.1	TRUE	TRUE	Spis_XP_022807543_1						Hvul_g6351_1	Hvul-g6351-1	Hvul-g6351-1
NV2g015444000.1	TRUE	TRUE	Spis_XP_022779751_1			Xesp_002240,Xesp_013753,Xesp_013754,Xesp_013752,Xesp_013755,Xesp_013756,Xesp_020028	Xesp-002240,Xesp-013753,Xesp-013754,Xesp-013752,Xesp-013755,Xesp-013756,Xesp-020028		Hvul_g26083_1	Hvul-g26083-1
NV2g015737000.1	TRUE	FALSE
NV2g015738000.1	TRUE	TRUE
NV2g015739000.1	TRUE	TRUE	Spis_XP_022780945_1	Spis-XP-022780945-1
NV2g015883000.1	TRUE	TRUE	Spis_XP_022785803_1
NV2g016329000.1	TRUE	TRUE	Spis_XP_022802101_1
NV2g016479000.1	TRUE	TRUE	Spis_XP_022800542_1	Spis-XP-022800542-1		Xesp_022398	Xesp-022398	Xesp-022398	Hvul_g29951_1	Hvul-g29951-1	Hvul-g29951-1
NV2g016480000.1	TRUE	TRUE
NV2g016526000.1	TRUE	TRUE	Spis_XP_022796202_1			Xesp_020821,Xesp_024184,Xesp_020830	Xesp-020821,Xesp-024184,Xesp-020830	Xesp-020830
NV2g016528000.1	TRUE	TRUE
NV2g016529000.1	TRUE	TRUE	Spis_XP_022796232_1,Spis_XP_022802098_1			Xesp_020821,Xesp_024184,Xesp_020830	Xesp-020821,Xesp-024184,Xesp-020830	Xesp-020830
NV2g016585000.1	TRUE	TRUE	Spis_XP_022794869_1			Xesp_004640	Xesp-004640	Xesp-004640	Hvul_g23207_1
NV2g017054000.1	TRUE	TRUE				Xesp_023500,Xesp_004788	Xesp-023500,Xesp-004788	Xesp-004788,Xesp-023500	Hvul_g19438_1,Hvul_g19440_1,Hvul_g31358_1,Hvul_g31361_1,Hvul_g31366_1,Hvul_g31363_1	Hvul-g19438-1,Hvul-g31366-1,Hvul-g31363-1
NV2g017120000.1	TRUE	TRUE
NV2g017391000.1	TRUE	TRUE	Spis_XP_022781704_1	Spis-XP-022781704-1		Xesp_018449	Xesp-018449		Hvul_g21243_1	Hvul-g21243-1	Hvul-g21243-1
NV2g017399000.1	TRUE	TRUE
NV2g017403000.1	TRUE	TRUE
NV2g017408000.1	TRUE	TRUE
NV2g017626000.1	TRUE	TRUE
NV2g017756000.1	TRUE	TRUE	Spis_XP_022780590_1			Xesp_015800	Xesp-015800		Hvul_g27612_1	Hvul-g27612-1	Hvul-g27612-1
NV2g018311000.1	TRUE	TRUE
NV2g018366000.1	TRUE	TRUE
NV2g018488000.1	TRUE	TRUE	Spis_XP_022786732_1						Hvul_g8620_1	Hvul-g8620-1	Hvul-g8620-1
NV2g018533000.1	TRUE	TRUE	Spis_XP_022806631_1,Spis_XP_022806621_1,Spis_XP_022792696_1			Xesp_013402	Xesp-013402	Xesp-013402	Hvul_g11680_1,Hvul_g31780_1	Hvul-g11680-1,Hvul-g31780-1	Hvul-g11680-1
NV2g018597000.1	TRUE	TRUE	Spis_XP_022782321_1	Spis-XP-022782321-1					Hvul_g28169_1	Hvul-g28169-1	Hvul-g28169-1
NV2g018626000.1	TRUE	TRUE
NV2g018850000.1	TRUE	TRUE
NV2g018915000.1	TRUE	TRUE				Xesp_013904	Xesp-013904	Xesp-013904	Hvul_g24398_1	Hvul-g24398-1	Hvul-g24398-1
NV2g019508000.1	TRUE	TRUE	Spis_XP_022788007_1,Spis_XP_022788008_1	Spis-XP-022788007-1		Xesp_022088,Xesp_026603,Xesp_026907,Xesp_026923	Xesp-022088,Xesp-026907,Xesp-026923	Xesp-022088	Hvul_g19302_1	Hvul-g19302-1	Hvul-g19302-1
NV2g020270000.1	TRUE	TRUE	Spis_XP_022798603_1			Xesp_021669	Xesp-021669	Xesp-021669	Hvul_g30670_1	Hvul-g30670-1	Hvul-g30670-1
NV2g020839000.1	TRUE	TRUE							Hvul_g4466_1	Hvul-g4466-1
NV2g020952000.1	TRUE	TRUE
NV2g021183000.1	TRUE	TRUE	Spis_XP_022796171_1			Xesp_014781	Xesp-014781	Xesp-014781
NV2g021576000.1	TRUE	TRUE	Spis_XP_022792982_1,Spis_XP_022782192_1	Spis-XP-022792982-1					Hvul_g31412_1	Hvul-g31412-1	Hvul-g31412-1
NV2g021577000.1	TRUE	TRUE	Spis_XP_022792982_1,Spis_XP_022782192_1	Spis-XP-022792982-1					Hvul_g31412_1	Hvul-g31412-1	Hvul-g31412-1
NV2g022740000.1	TRUE	TRUE	Spis_XP_022779187_1
NV2g023081000.1	TRUE	TRUE	Spis_XP_022806307_1,Spis_XP_022788907_1,Spis_XP_022800937_1			Xesp_021447,Xesp_021457	Xesp-021447	Xesp-021447	Hvul_g22797_1	Hvul-g22797-1	Hvul-g22797-1
NV2g023629000.1	TRUE	TRUE
NV2g023791000.1	TRUE	TRUE
NV2g024161000.1	TRUE	TRUE	Spis_XP_022781908_1
NV2g025010000.1	TRUE	TRUE	Spis_XP_022786411_1	Spis-XP-022786411-1		Xesp_008333	Xesp-008333		Hvul_g21921_1	Hvul-g21921-1
NV2g025184000.1	TRUE	TRUE	Spis_XP_022805561_1,Spis_XP_022805563_1,Spis_XP_022796800_1	Spis-XP-022796800-1	Spis-XP-022796800-1	Xesp_007487	Xesp-007487	Xesp-007487	Hvul_g14743_1,Hvul_g14746_1	Hvul-g14743-1,Hvul-g14746-1	Hvul-g14746-1,Hvul-g14743-1
NV2g025360000.1	TRUE	TRUE
NV2g025743000.1	TRUE	TRUE

## Sheet: znf845_foxE_like
Nv_protein_ID	Nv_cnidocyte_expr(>0.3)	Nv_cnidocyte_marker_gene	Sp_ortholog	Sp_ortholog_cnidocyte_expr(>0.3)	Sp_ortholog_cnidocyte_marker_gene	Xe_ortholog	Xe_ortholog_cnidocyte_expr(>0.3)	Xe_ortholog_cnidocyte_marker_gene	Hv_ortholog	Hv_ortholog_cnidocyte_expr(>0.3)	Hv_ortholog_cnidocyte_marker_gene
NV2g000675000.1	TRUE	TRUE	Spis_XP_022796937_1			Xesp_001052	Xesp-001052	Xesp-001052	Hvul_g15332_1	Hvul-g15332-1	Hvul-g15332-1
NV2g000676000.1	TRUE	TRUE	Spis_XP_022796946_1			Xesp_001053	Xesp-001053	Xesp-001053								Orthologs	exp. Cnidocytes
NV2g000949000.1	TRUE	TRUE	Spis_XP_022802502_1	Spis-XP-022802502-1	Spis-XP-022802502-1	Xesp_015564			Hvul_g24777_1	Hvul-g24777-1	Hvul-g24777-1				Stylophora	55	26
NV2g001257000.1	TRUE	TRUE													Xenia	44	43
NV2g001335000.1	TRUE	TRUE	Spis_XP_022799329_1			Xesp_002139,Xesp_002140	Xesp-002139,Xesp-002140		Hvul_g6659_1,Hvul_g9460_1	Hvul-g6659-1,Hvul-g9460-1					Hydra vulgaris	38	38
NV2g002533000.1	TRUE	TRUE	Spis_XP_022798266_1	Spis-XP-022798266-1	Spis-XP-022798266-1	Xesp_015871	Xesp-015871	Xesp-015871	Hvul_g22221_1	Hvul-g22221-1	Hvul-g22221-1
NV2g002743000.1	TRUE	TRUE	Spis_XP_022794056_1
NV2g003011000.1	TRUE	TRUE
NV2g003135000.1	TRUE	TRUE	Spis_XP_022787912_1			Xesp_014764	Xesp-014764	Xesp-014764	Hvul_g5617_1,Hvul_g5618_1	Hvul-g5617-1,Hvul-g5618-1	Hvul-g5618-1,Hvul-g5617-1
NV2g003485000.1	TRUE	TRUE	Spis_XP_022785756_1	Spis-XP-022785756-1		Xesp_015994	Xesp-015994	Xesp-015994	Hvul_g18922_1,Hvul_g18928_1	Hvul-g18922-1,Hvul-g18928-1	Hvul-g18922-1,Hvul-g18928-1
NV2g004218000.1	TRUE	TRUE	Spis_XP_022790021_1			Xesp_005278	Xesp-005278	Xesp-005278
NV2g004676000.1	TRUE	TRUE	Spis_XP_022794101_1	Spis-XP-022794101-1		Xesp_006986	Xesp-006986	Xesp-006986	Hvul_g23588_1	Hvul-g23588-1
NV2g004774000.1	TRUE	TRUE
NV2g005169000.1	TRUE	TRUE				Xesp_005615	Xesp-005615	Xesp-005615
NV2g005188000.1	TRUE	TRUE
NV2g005190000.1	TRUE	TRUE
NV2g005192000.1	TRUE	TRUE
NV2g005194000.1	TRUE	TRUE	Spis_XP_022806666_1	Spis-XP-022806666-1	Spis-XP-022806666-1	Xesp_006068	Xesp-006068	Xesp-006068	Hvul_g3982_1,Hvul_g3981_1	Hvul-g3982-1,Hvul-g3981-1	Hvul-g3981-1
NV2g005319000.1	TRUE	TRUE
NV2g006072000.1	TRUE	TRUE
NV2g006161000.1	TRUE	TRUE
NV2g006162000.1	TRUE	TRUE	Spis_XP_022809635_1	Spis-XP-022809635-1					Hvul_g8620_1	Hvul-g8620-1	Hvul-g8620-1
NV2g006437000.1	TRUE	TRUE
NV2g006826000.1	TRUE	TRUE
NV2g007012000.1	TRUE	TRUE	Spis_XP_022778891_1,Spis_XP_022799024_1,Spis_XP_022810038_1	Spis-XP-022778891-1,Spis-XP-022799024-1,Spis-XP-022810038-1	Spis-XP-022810038-1	Xesp_014540,Xesp_014805,Xesp_009514,Xesp_009511,Xesp_009513,Xesp_015404	Xesp-014540,Xesp-014805,Xesp-009514,Xesp-009511,Xesp-009513	Xesp-009514,Xesp-009511,Xesp-009513	Hvul_g13166_1,Hvul_g27117_1	Hvul-g13166-1,Hvul-g27117-1	Hvul-g27117-1,Hvul-g13166-1
NV2g007167000.1	TRUE	TRUE	Spis9405_1,Spis_XP_022790163_1,Spis_XP_022790159_1,Spis_XP_022790165_1,Spis_XP_022782672_1,Spis_XP_022790178_1	Spis-XP-022790178-1		Xesp_007437	Xesp-007437	Xesp-007437	Hvul_g23500_1,Hvul_g14975_1,Hvul_g14976_1	Hvul-g23500-1,Hvul-g14975-1	Hvul-g23500-1,Hvul-g14975-1
NV2g007843000.1	TRUE	TRUE
NV2g008353000.1	TRUE	TRUE	Spis_XP_022778973_1,Spis_XP_022778992_1,Spis_XP_022778969_1,Spis2571_1,Spis_XP_022779049_1,Spis_XP_022779066_1,Spis_XP_022779067_1	Spis-XP-022778973-1,Spis-XP-022779066-1	Spis-XP-022779066-1	Xesp_025224	Xesp-025224	Xesp-025224
NV2g008776000.1	TRUE	TRUE
NV2g009120000.1	TRUE	TRUE							Hvul_g4285_1	Hvul-g4285-1	Hvul-g4285-1
NV2g009507000.1	TRUE	TRUE	Spis_XP_022779846_1			Xesp_008638	Xesp-008638	Xesp-008638
NV2g009510000.1	TRUE	TRUE	Spis_XP_022796828_1,Spis_XP_022796851_1
NV2g009534000.1	TRUE	TRUE	Spis_XP_022779932_1	Spis-XP-022779932-1	Spis-XP-022779932-1	Xesp_008174	Xesp-008174	Xesp-008174	Hvul_g32579_1	Hvul-g32579-1	Hvul-g32579-1
NV2g009746000.1	TRUE	TRUE
NV2g010528000.1	TRUE	TRUE
NV2g010897000.1	TRUE	TRUE	Spis_XP_022793135_1
NV2g010953000.1	TRUE	TRUE
NV2g011056000.1	TRUE	TRUE	Spis_XP_022785594_1	Spis-XP-022785594-1					Hvul_g3383_1	Hvul-g3383-1
NV2g011394000.1	TRUE	TRUE	Spis_XP_022803351_1			Xesp_009308	Xesp-009308	Xesp-009308
NV2g011718000.1	TRUE	TRUE	Spis_XP_022797406_1						Hvul_g369_1	Hvul-g369-1	Hvul-g369-1
NV2g011725000.1	TRUE	TRUE
NV2g011815000.1	TRUE	TRUE
NV2g011820000.1	TRUE	TRUE	Spis18341_1	Spis18341-1	Spis18341-1				Hvul_g33051_1,Hvul_g33053_1	Hvul-g33051-1,Hvul-g33053-1	Hvul-g33051-1,Hvul-g33053-1
NV2g012063000.1	TRUE	TRUE	Spis_XP_022791680_1			Xesp_006099	Xesp-006099	Xesp-006099	Hvul_g20766_1	Hvul-g20766-1	Hvul-g20766-1
NV2g012442000.1	TRUE	TRUE
NV2g012622000.1	TRUE	TRUE
NV2g012708000.1	TRUE	TRUE	Spis_XP_022807057_1	Spis-XP-022807057-1	Spis-XP-022807057-1	Xesp_022238	Xesp-022238	Xesp-022238
NV2g012897000.1	TRUE	TRUE	Spis_XP_022788336_1			Xesp_021391	Xesp-021391	Xesp-021391	Hvul_g2328_1	Hvul-g2328-1	Hvul-g2328-1
NV2g013049000.1	TRUE	TRUE	Spis_XP_022799395_1
NV2g013095000.1	TRUE	TRUE	Spis_XP_022789531_1	Spis-XP-022789531-1		Xesp_012903	Xesp-012903	Xesp-012903	Hvul_g24108_1	Hvul-g24108-1	Hvul-g24108-1
NV2g013801000.1	TRUE	TRUE	Spis_XP_022807537_1			Xesp_008627	Xesp-008627	Xesp-008627	Hvul_g13145_1	Hvul-g13145-1
NV2g013830000.1	TRUE	TRUE	Spis_XP_022789219_1	Spis-XP-022789219-1
NV2g014428000.1	TRUE	TRUE	Spis_XP_022777526_1	Spis-XP-022777526-1		Xesp_012872	Xesp-012872	Xesp-012872
NV2g014511000.1	TRUE	TRUE				Xesp_021669	Xesp-021669	Xesp-021669	Hvul_g30670_1	Hvul-g30670-1	Hvul-g30670-1
NV2g014941000.1	TRUE	TRUE	Spis_XP_022799159_1			Xesp_029089	Xesp-029089	Xesp-029089	Hvul_g20486_1	Hvul-g20486-1
NV2g015638000.1	TRUE	TRUE	Spis_XP_022778921_1,Spis_XP_022780959_1			Xesp_007471	Xesp-007471	Xesp-007471	Hvul_g11204_1	Hvul-g11204-1	Hvul-g11204-1
NV2g015888000.1	TRUE	TRUE	Spis_XP_022802083_1	Spis-XP-022802083-1					Hvul_g4449_1	Hvul-g4449-1	Hvul-g4449-1
NV2g016362000.1	TRUE	TRUE	Spis_XP_022796201_1			Xesp_019814	Xesp-019814	Xesp-019814	Hvul_g11853_1	Hvul-g11853-1	Hvul-g11853-1
NV2g016646000.1	TRUE	TRUE
NV2g016993000.1	TRUE	TRUE
NV2g017000000.1	TRUE	TRUE	Spis_XP_022800515_1	Spis-XP-022800515-1		Xesp_004432	Xesp-004432	Xesp-004432
NV2g017806000.1	TRUE	TRUE				Xesp_013122	Xesp-013122	Xesp-013122
NV2g018174000.1	TRUE	TRUE	Spis_XP_022784946_1,Spis_XP_022784961_1	Spis-XP-022784961-1
NV2g018310000.1	TRUE	TRUE	Spis_XP_022789330_1	Spis-XP-022789330-1		Xesp_013693	Xesp-013693	Xesp-013693
NV2g018954000.1	TRUE	TRUE	Spis_XP_022785880_1	Spis-XP-022785880-1		Xesp_013225	Xesp-013225	Xesp-013225	Hvul_g19605_1	Hvul-g19605-1	Hvul-g19605-1
NV2g019341000.1	TRUE	FALSE
NV2g019758000.1	TRUE	TRUE	Spis_XP_022791145_1			Xesp_011767	Xesp-011767	Xesp-011767	Hvul_g4579_1	Hvul-g4579-1	Hvul-g4579-1
NV2g020325000.1	TRUE	TRUE	Spis_XP_022807675_1	Spis-XP-022807675-1	Spis-XP-022807675-1	Xesp_012182	Xesp-012182	Xesp-012182
NV2g020419000.1	TRUE	TRUE	Spis_XP_022805392_1,Spis_XP_022792413_1,Spis_XP_022805395_1	Spis-XP-022805392-1,Spis-XP-022805395-1		Xesp_012303	Xesp-012303	Xesp-012303	Hvul_g29341_1	Hvul-g29341-1	Hvul-g29341-1
NV2g021537000.1	TRUE	TRUE	Spis_XP_022791201_1	Spis-XP-022791201-1
NV2g022454000.1	TRUE	TRUE	Spis_XP_022788893_1			Xesp_014585	Xesp-014585	Xesp-014585	Hvul_g27294_1	Hvul-g27294-1	Hvul-g27294-1
NV2g022490000.1	TRUE	TRUE	Spis_XP_022788911_1						Hvul_g4438_1	Hvul-g4438-1
NV2g023584000.1	TRUE	TRUE
NV2g023951000.1	TRUE	TRUE	Spis_XP_022794178_1						Hvul_g27436_1,Hvul_g3024_1,Hvul_g3018_1,Hvul_g3019_1	Hvul-g27436-1,Hvul-g3024-1
NV2g024032000.1	TRUE	TRUE				Xesp_015666	Xesp-015666		Hvul_g20690_1,Hvul_g20710_1,Hvul_g20696_1,Hvul_g20694_1,Hvul_g20700_1	Hvul-g20690-1,Hvul-g20696-1,Hvul-g20694-1,Hvul-g20700-1	Hvul-g20700-1,Hvul-g20690-1
NV2g024307000.1	TRUE	TRUE	Spis_XP_022803388_1			Xesp_002936	Xesp-002936	Xesp-002936	Hvul_g26968_1	Hvul-g26968-1	Hvul-g26968-1
NV2g024308000.1	TRUE	TRUE	Spis_XP_022803398_1			Xesp_002936	Xesp-002936	Xesp-002936	Hvul_g26968_1	Hvul-g26968-1	Hvul-g26968-1
NV2g024309000.1	TRUE	TRUE
NV2g024342000.1	TRUE	TRUE	Spis9405_1,Spis_XP_022790163_1,Spis_XP_022790159_1,Spis_XP_022790165_1,Spis_XP_022782672_1,Spis_XP_022790178_1	Spis-XP-022790178-1		Xesp_007437	Xesp-007437	Xesp-007437	Hvul_g23500_1,Hvul_g14975_1,Hvul_g14976_1	Hvul-g23500-1,Hvul-g14975-1	Hvul-g23500-1,Hvul-g14975-1
NV2g024358000.1	TRUE	TRUE	Spis_XP_022790152_1	Spis-XP-022790152-1		Xesp_007395	Xesp-007395	Xesp-007395
NV2g024363000.1	TRUE	TRUE	Spis_XP_022790188_1
NV2g024666000.1	TRUE	TRUE	Spis_XP_022786451_1			Xesp_007937	Xesp-007937	Xesp-007937	Hvul_g13741_1	Hvul-g13741-1
NV2g024780000.1	TRUE	TRUE	Spis_XP_022794308_1			Xesp_008778	Xesp-008778	Xesp-008778	Hvul_g12363_1	Hvul-g12363-1	Hvul-g12363-1
NV2g024908000.1	TRUE	FALSE	Spis_XP_022807978_1,Spis_XP_022789119_1			Xesp_007997,Xesp_008003	Xesp-007997
NV2g025228000.1	TRUE	TRUE
NV2g025410000.1	TRUE	TRUE	Spis_XP_022790567_1			Xesp_007935	Xesp-007935		Hvul_g16335_1	Hvul-g16335-1

## Sheet: znf845_paxA_foxE_like
Nv_protein_ID	Nv_cnidocyte_expr(>0.3)	Nv_cnidocyte_marker_gene	Sp_ortholog	Sp_ortholog_cnidocyte_expr(>0.3)	Sp_ortholog_cnidocyte_marker_gene	Xe_ortholog	Xe_ortholog_cnidocyte_expr(>0.3)	Xe_ortholog_cnidocyte_marker_gene	Hv_ortholog	Hv_ortholog_cnidocyte_expr(>0.3)	Hv_ortholog_cnidocyte_marker_gene
NV2g000119000.1	TRUE	TRUE	Spis_XP_022779799_1			Xesp_000538	Xesp-000538	Xesp-000538
NV2g001841000.1	TRUE	TRUE	Spis_XP_022783462_1	Spis-XP-022783462-1					Hvul_g19213_1,Hvul_g3353_1	Hvul-g19213-1,Hvul-g3353-1
NV2g003341000.1	TRUE	TRUE	Spis_XP_022804315_1			Xesp_016060	Xesp-016060									Orthologs	exp. Cnidocytes
NV2g004793000.1	TRUE	TRUE													Stylophora	17	13
NV2g005187000.1	TRUE	TRUE				Xesp_005615	Xesp-005615	Xesp-005615	Hvul_g13980_1,Hvul_g5217_1,Hvul_g5218_1	Hvul-g13980-1,Hvul-g5218-1					Xenia	13	11
NV2g005189000.1	TRUE	TRUE							Hvul_g26932_1	Hvul-g26932-1	Hvul-g26932-1				Hydra vulgaris	13	10
NV2g005232000.1	TRUE	TRUE	Spis_XP_022786717_1	Spis-XP-022786717-1	Spis-XP-022786717-1	Xesp_017780
NV2g005798000.1	TRUE	TRUE	Spis_XP_022798207_1	Spis-XP-022798207-1
NV2g006438000.1	TRUE	TRUE	Spis_XP_022799985_1	Spis-XP-022799985-1		Xesp_002417	Xesp-002417	Xesp-002417	Hvul_g32872_1	Hvul-g32872-1	Hvul-g32872-1
NV2g006698000.1	TRUE	TRUE	Spis_XP_022785526_1	Spis-XP-022785526-1					Hvul_g27678_1	Hvul-g27678-1
NV2g007755000.1	TRUE	TRUE	Spis_XP_022790903_1,Spis_XP_022799254_1,Spis_XP_022799253_1,Spis_XP_022799263_1,Spis_XP_022782767_1,Spis_XP_022784152_1	Spis-XP-022784152-1		Xesp_000705			Hvul_g4790_1	Hvul-g4790-1
NV2g008976000.1	TRUE	TRUE	Spis_XP_022805488_1	Spis-XP-022805488-1	Spis-XP-022805488-1	Xesp_011651	Xesp-011651	Xesp-011651	Hvul_g26901_1	Hvul-g26901-1	Hvul-g26901-1
NV2g010332000.1	TRUE	TRUE	Spis_XP_022789521_1	Spis-XP-022789521-1	Spis-XP-022789521-1	Xesp_008469	Xesp-008469	Xesp-008469	Hvul_g5994_1	Hvul-g5994-1	Hvul-g5994-1
NV2g010927000.1	TRUE	TRUE
NV2g011028000.1	TRUE	TRUE	Spis_XP_022789945_1			Xesp_021953	Xesp-021953	Xesp-021953
NV2g011163000.1	TRUE	TRUE
NV2g011233000.1	TRUE	TRUE	Spis23331_1,Spis_XP_022805612_1,Spis23330_1,Spis_XP_022809973_1,Spis_XP_022805615_1,Spis_XP_022797061_1,Spis_XP_022797070_1	Spis23331-1,Spis-XP-022805612-1,Spis23330-1,Spis-XP-022797061-1,Spis-XP-022797070-1
NV2g011859000.1	TRUE	FALSE	Spis_XP_022785752_1,Spis_XP_022787108_1,Spis6559_1	Spis-XP-022785752-1					Hvul_g21933_1,Hvul_g7173_1
NV2g012553000.1	TRUE	TRUE	Spis_XP_022800612_1	Spis-XP-022800612-1	Spis-XP-022800612-1	Xesp_022147	Xesp-022147	Xesp-022147
NV2g015937000.1	TRUE	TRUE	Spis_XP_022800540_1	Spis-XP-022800540-1		Xesp_004436	Xesp-004436	Xesp-004436	Hvul_g14081_1
NV2g016328000.1	TRUE	FALSE							Hvul_g14751_1
NV2g016360000.1	TRUE	TRUE	Spis_XP_022797092_1	Spis-XP-022797092-1
NV2g017017000.1	TRUE	TRUE				Xesp_013350	Xesp-013350		Hvul_g2273_1	Hvul-g2273-1
NV2g017607000.1	TRUE	TRUE
NV2g017887000.1	TRUE	TRUE	Spis_XP_022797010_1			Xesp_013904	Xesp-013904	Xesp-013904	Hvul_g24398_1	Hvul-g24398-1	Hvul-g24398-1
NV2g018406000.1	TRUE	TRUE
NV2g020491000.1	TRUE	TRUE
NV2g023281000.1	TRUE	TRUE
NV2g025695000.1	TRUE	TRUE

## Sheet: foxE_like
Nv_protein_ID	Nv_cnidocyte_expr(>0.3)	Nv_cnidocyte_marker_gene	Sp_ortholog	Sp_ortholog_cnidocyte_expr(>0.3)	Sp_ortholog_cnidocyte_marker_gene	Xe_ortholog	Xe_ortholog_cnidocyte_expr(>0.3)	Xe_ortholog_cnidocyte_marker_gene	Hv_ortholog	Hv_ortholog_cnidocyte_expr(>0.3)	Hv_ortholog_cnidocyte_marker_gene
NV2g001183000.1	TRUE	FALSE	Spis_XP_022802459_1,Spis_XP_022802484_1,Spis_XP_022802485_1,Spis_XP_022802481_1			Xesp_005393,Xesp_005390,Xesp_011018	Xesp-005393,Xesp-005390	Xesp-005390	Hvul_g1012_1,Hvul_g1011_1,Hvul_g1013_1	Hvul-g1012-1,Hvul-g1011-1,Hvul-g1013-1	Hvul-g1012-1
NV2g001448000.1	TRUE	FALSE
NV2g001824000.1	TRUE	TRUE	Spis_XP_022787630_1,Spis_XP_022787584_1	Spis-XP-022787584-1		Xesp_013085	Xesp-013085		Hvul_g9130_1	Hvul-g9130-1	Hvul-g9130-1					Orthologs	exp. Cnidocytes
NV2g003409000.1	TRUE	FALSE	Spis15796_1												Stylophora	19	5
NV2g004530000.1	TRUE	TRUE	Spis_XP_022791769_1						Hvul_g19253_1,Hvul_g21790_1	Hvul-g19253-1					Xenia	13	9
NV2g005358000.1	TRUE	FALSE													Hydra vulgaris	14	11
NV2g006240000.1	TRUE	TRUE	Spis_XP_022804597_1			Xesp_002475			Hvul_g24884_1,Hvul_g32681_1,Hvul_g16977_1,Hvul_g16978_1	Hvul-g24884-1,Hvul-g32681-1,Hvul-g16977-1,Hvul-g16978-1	Hvul-g32681-1,Hvul-g24884-1
NV2g006405000.1	TRUE	FALSE				Xesp_017966,Xesp_020430			Hvul_g11081_1,Hvul_g18206_1
NV2g006615000.1	TRUE	TRUE				Xesp_006162,Xesp_006104,Xesp_027466,Xesp_027484	Xesp-006162,Xesp-006104		Hvul_g11902_1
NV2g009823000.1	TRUE	TRUE
NV2g010307000.1	TRUE	TRUE	Spis_XP_022777596_1,Spis_XP_022808237_1,Spis_XP_022804005_1,Spis_XP_022794756_1,Spis_XP_022794740_1,Spis_XP_022794752_1,Spis_XP_022796679_1,Spis_XP_022808352_1,Spis_XP_022808353_1,Spis_XP_022794758_1,Spis_XP_022810127_1,Spis_XP_022794759_1,Spis_XP_022810618_1,Spis_XP_022810125_1,Spis_XP_022800041_1,Spis_XP_022792633_1,Spis_XP_022792672_1,Spis_XP_022792674_1,Spis_XP_022809621_1,Spis_XP_022803698_1…	Spis-XP-022809622-1,Spis-XP-022794745-1
NV2g010358000.1	TRUE	TRUE	Spis_XP_022786556_1			Xesp_015513	Xesp-015513
NV2g012709000.1	TRUE	FALSE	Spis_XP_022807073_1			Xesp_000820			Hvul_g28439_1,Hvul_g8195_1	Hvul-g28439-1,Hvul-g8195-1
NV2g013307000.1	TRUE	TRUE
NV2g014340000.1	TRUE	FALSE
NV2g014570000.1	TRUE	TRUE	Spis_XP_022784289_1,Spis_XP_022784267_1,Spis_XP_022784237_1,Spis_XP_022798880_1,Spis_XP_022795240_1,Spis_XP_022795239_1,Spis_XP_022795231_1,Spis_XP_022795242_1			Xesp_013168	Xesp-013168		Hvul_g24667_1,Hvul_g26232_1	Hvul-g24667-1,Hvul-g26232-1	Hvul-g26232-1
NV2g014631000.1	TRUE	TRUE
NV2g015027000.1	TRUE	TRUE	Spis_XP_022801713_1						Hvul_g23666_1	Hvul-g23666-1	Hvul-g23666-1
NV2g015362000.1	TRUE	TRUE	Spis_XP_022780093_1,Spis_XP_022782018_1,Spis_XP_022800497_1	Spis-XP-022780093-1,Spis-XP-022800497-1		Xesp_015665	Xesp-015665		Hvul_g6968_1
NV2g016568000.1	TRUE	TRUE
NV2g017351000.1	TRUE	TRUE
NV2g018171000.1	TRUE	TRUE	Spis_XP_022783050_1,Spis_XP_022783049_1,Spis_XP_022806257_1,Spis3773_1,Spis_XP_022783051_1
NV2g018430000.1	TRUE	TRUE	Spis_XP_022785654_1			Xesp_003556	Xesp-003556
NV2g018535000.1	TRUE	TRUE	Spis_XP_022805703_1			Xesp_003927	Xesp-003927	Xesp-003927	Hvul_g15655_1	Hvul-g15655-1
NV2g019689000.1	TRUE	FALSE
NV2g019749000.1	TRUE	TRUE	Spis_XP_022803294_1	Spis-XP-022803294-1					Hvul_g21606_1,Hvul_g23720_1	Hvul-g21606-1,Hvul-g23720-1	Hvul-g21606-1,Hvul-g23720-1
NV2g020770000.1	TRUE	FALSE
NV2g021413000.1	TRUE	FALSE	Spis_XP_022801985_1,Spis_XP_022806967_1,Spis_XP_022796182_1,Spis_XP_022778439_1,Spis_XP_022801984_1,Spis_XP_022801983_1						Hvul_g31033_1	Hvul-g31033-1
NV2g022835000.1	TRUE	TRUE	Spis_XP_022789103_1
NV2g022943000.1	TRUE	TRUE	Spis_XP_022784864_1	Spis-XP-022784864-1		Xesp_002963	Xesp-002963	Xesp-002963
NV2g025991000.1	TRUE	TRUE	Spis_XP_022800136_1,Spis_XP_022800147_1			Xesp_000527			Hvul_g24126_1	Hvul-g24126-1

## Sheet: paxA_inhibit_znf845
Nv_protein_ID	Nv_cnidocyte_expr(>0.3)	Nv_cnidocyte_marker_gene	Sp_ortholog	Sp_ortholog_cnidocyte_expr(>0.3)	Sp_ortholog_cnidocyte_marker_gene	Xe_ortholog	Xe_ortholog_cnidocyte_expr(>0.3)	Xe_ortholog_cnidocyte_marker_gene	Hv_ortholog	Hv_ortholog_cnidocyte_expr(>0.3)	Hv_ortholog_cnidocyte_marker_gene
NV2g001877000.1	TRUE	TRUE
NV2g002763000.1	TRUE	FALSE
NV2g002780000.1	TRUE	TRUE	Spis_XP_022801159_1,Spis_XP_022801157_1													Orthologs	exp. Cnidocytes
NV2g003876000.1	TRUE	TRUE	Spis_XP_022791654_1			Xesp_013349,Xesp_027058,Xesp_027389,Xesp_001445,Xesp_026833,Xesp_023612,Xesp_023600,Xesp_023599,Xesp_023604,Xesp_023611,Xesp_019901	Xesp-027389,Xesp-001445,Xesp-023612,Xesp-023599,Xesp-023611,Xesp-019901	Xesp-023612							Stylophora	21	11
NV2g004006000.1	TRUE	TRUE	Spis_XP_022802488_1	Spis-XP-022802488-1	Spis-XP-022802488-1										Xenia	12	11
NV2g005321000.1	TRUE	TRUE													Hydra vulgaris	13	13
NV2g006485000.1	TRUE	TRUE	Spis_XP_022804516_1	Spis-XP-022804516-1		Xesp_021998,Xesp_024999	Xesp-021998,Xesp-024999	Xesp-024999	Hvul_g7830_1	Hvul-g7830-1
NV2g008359000.1	TRUE	TRUE	Spis_XP_022785514_1,Spis_XP_022785522_1,Spis_XP_022785534_1,Spis_XP_022785532_1	Spis-XP-022785522-1		Xesp_011925,Xesp_012436	Xesp-011925,Xesp-012436		Hvul_g30924_1,Hvul_g18692_1,Hvul_g2335_1,Hvul_g30926_1,Hvul_g18690_1,Hvul_g30923_1	Hvul-g30924-1,Hvul-g18692-1,Hvul-g30926-1,Hvul-g18690-1,Hvul-g30923-1	Hvul-g30926-1,Hvul-g30923-1
NV2g008601000.1	TRUE	TRUE
NV2g009504000.1	TRUE	TRUE							Hvul_g25747_1	Hvul-g25747-1	Hvul-g25747-1
NV2g009744000.1	TRUE	TRUE
NV2g010316000.1	TRUE	TRUE							Hvul_g20517_1,Hvul_g25126_1	Hvul-g25126-1
NV2g010557000.1	TRUE	TRUE
NV2g011608000.1	TRUE	TRUE	Spis_XP_022797588_1			Xesp_022183			Hvul_g15158_1	Hvul-g15158-1
NV2g011802000.1	TRUE	TRUE	Spis_XP_022799451_1			Xesp_001211	Xesp-001211	Xesp-001211	Hvul_g4012_1	Hvul-g4012-1
NV2g011823000.1	TRUE	TRUE	Spis_XP_022803634_1	Spis-XP-022803634-1	Spis-XP-022803634-1
NV2g011826000.1	TRUE	TRUE
NV2g011827000.1	TRUE	TRUE
NV2g012200000.1	TRUE	TRUE				Xesp_005621	Xesp-005621
NV2g012499000.1	TRUE	TRUE
NV2g012500000.1	TRUE	TRUE	Spis_XP_022808151_1						Hvul_g22970_1	Hvul-g22970-1	Hvul-g22970-1
NV2g012689000.1	TRUE	TRUE
NV2g012691000.1	TRUE	TRUE	Spis_XP_022803626_1	Spis-XP-022803626-1	Spis-XP-022803626-1
NV2g013057000.1	TRUE	TRUE
NV2g013702000.1	TRUE	TRUE	Spis_XP_022802564_1			Xesp_027218,Xesp_012878,Xesp_012877,Xesp_012885,Xesp_012883,Xesp_012884	Xesp-027218,Xesp-012878,Xesp-012877,Xesp-012885,Xesp-012883,Xesp-012884	Xesp-012883	Hvul_g32691_1	Hvul-g32691-1	Hvul-g32691-1
NV2g014106000.1	TRUE	TRUE	Spis_XP_022805214_1
NV2g014815000.1	TRUE	TRUE
NV2g014846000.1	TRUE	TRUE							Hvul_g16183_1,Hvul_g16184_1,Hvul_g18941_1,Hvul_g11331_1,Hvul_g11332_1,Hvul_g29335_1	Hvul-g18941-1
NV2g016903000.1	TRUE	TRUE	Spis_XP_022790717_1			Xesp_020876,Xesp_020891	Xesp-020876,Xesp-020891
NV2g017239000.1	TRUE	TRUE
NV2g018306000.1	TRUE	TRUE	Spis_XP_022789330_1	Spis-XP-022789330-1		Xesp_013693	Xesp-013693	Xesp-013693
NV2g018817000.1	TRUE	TRUE
NV2g019216000.1	TRUE	TRUE
NV2g019432000.1	TRUE	TRUE	Spis_XP_022802913_1,Spis_XP_022788734_1,Spis_XP_022802891_1,Spis_XP_022800534_1,Spis_XP_022790660_1,Spis_XP_022780926_1,Spis_XP_022778244_1,Spis_XP_022790038_1			Xesp_021669	Xesp-021669	Xesp-021669	Hvul_g30670_1	Hvul-g30670-1	Hvul-g30670-1
NV2g019556000.1	TRUE	TRUE	Spis_XP_022800413_1,Spis_XP_022800412_1,Spis_XP_022800409_1,Spis_XP_022800411_1	Spis-XP-022800413-1,Spis-XP-022800412-1		Xesp_022088,Xesp_026603,Xesp_026907,Xesp_026923	Xesp-022088,Xesp-026907,Xesp-026923	Xesp-022088	Hvul_g19302_1	Hvul-g19302-1	Hvul-g19302-1
NV2g019727000.1	TRUE	TRUE	Spis_XP_022807376_1,Spis_XP_022790971_1,Spis_XP_022791002_1,Spis_XP_022790981_1,Spis_XP_022790980_1,Spis_XP_022786859_1,Spis_XP_022786857_1	Spis-XP-022790981-1					Hvul_g25482_1,Hvul_g15914_1,Hvul_g6980_1,Hvul_g6983_1	Hvul-g25482-1,Hvul-g6980-1	Hvul-g25482-1,Hvul-g6980-1
NV2g020428000.1	TRUE	TRUE
NV2g020429000.1	TRUE	TRUE
NV2g020795000.1	TRUE	TRUE
NV2g021271000.1	TRUE	TRUE	Spis_XP_022796188_1	Spis-XP-022796188-1	Spis-XP-022796188-1				Hvul_g18469_1	Hvul-g18469-1	Hvul-g18469-1
NV2g022131000.1	TRUE	TRUE	Spis_XP_022797314_1	Spis-XP-022797314-1	Spis-XP-022797314-1
NV2g023122000.1	TRUE	TRUE
NV2g024361000.1	TRUE	TRUE	Spis_XP_022790170_1
NV2g024738000.1	TRUE	TRUE	Spis_XP_022793238_1,Spis_XP_022786563_1,Spis3057_1,Spis_XP_022779921_1,Spis_XP_022779922_1,Spis17057_1,Spis_XP_022801742_1,Spis_XP_022785078_1,Spis_XP_022783543_1,Spis_XP_022810110_1	Spis-XP-022779921-1		Xesp_003552,Xesp_003549,Xesp_003555,Xesp_003554,Xesp_003536,Xesp_003548,Xesp_003553	Xesp-003549,Xesp-003555,Xesp-003548
