# Supplementary material for: Lineage-specific elaboration of a conserved cnidogenic program drives cnidocyte diversification and illuminates cell type evolution
Source: Research Square preprint supplement (doi:10.21203/rs.3.rs-10009230/v1), 2026-06-30
Supplement: Supplementary file 2 [file 0f9e29e9c6c231c7c2adc4da.xlsx]

## Sheet: Aiptasia
gene_id	query_id	subject_id	perc_identity	num_ident_matches	alig_length	mismatches	gap_openings	n_gaps	pos_match	ppos	q_start	q_end	q_len	qcov	qcovhsp	s_start	s_end	s_len	evalue	bit_score	score_raw
NV2g000118000.1	NV2t000118001.1	XP_028517009.1	65.325	422	646	219	3	5	500	77.4	1	641	654	98	98	6	651	658	0	904	2335
NV2g000119000.1	NV2t000119001.1	XP_020908185.1	46.362	223	481	248	4	10	303	62.99	6	483	492	97	97	7	480	481	3.47e-152	442	1137
NV2g000131000.1	NV2t000131001.1	XP_020906933.1	57.724	142	246	103	1	1	185	75.2	13	258	260	95	95	16	260	260	2.17e-103	301	770
NV2g000273000.1	NV2t000273001.1	XP_020897262.1	66.423	273	411	133	4	5	331	80.54	1	409	410	99	99	1	408	409	0	538	1386
NV2g000295000.1	NV2t000295001.1	XP_028516431.1	63.06	408	647	211	9	28	510	78.83	26	649	651	96	96	47	688	690	0	838	2166
NV2g000667000.1	NV2t000667001.1	XP_020896514.1	72.376	131	181	50	0	0	147	81.22	2	182	187	97	97	41	221	252	2.85e-88	259	662
NV2g000675000.1	NV2t000675002.1	XP_020896225.1	59.66	386	647	228	10	33	477	73.72	54	684	688	92	92	40	669	677	0	783	2022
NV2g000676000.1	NV2t000676001.1	XP_020896337.1	62.524	322	515	173	6	20	398	77.28	10	510	541	93	93	2	510	528	0	670	1729
NV2g000767000.1	NV2t000767001.1	XP_020904625.1	59.603	90	151	61	0	0	113	74.83	11	161	185	82	82	9	159	160	1.26e-69	208	530
NV2g000918000.1	NV2t000918002.1	XP_028516408.1	70.906	368	519	129	9	22	426	82.08	8	519	844	84	61	9	512	770	0	737	1902
NV2g000919000.1	NV2t000919004.1	XP_020904128.1	67.462	311	461	130	9	20	368	79.83	1	451	451	100	100	1	451	451	0	640	1650
NV2g000920000.1	NV2t000920002.1	XP_028515908.1	54.61	154	282	118	3	10	207	73.4	14	290	323	86	86	11	287	289	4.24e-114	332	850
NV2g000922000.1	NV2t000922001.1	XP_020898791.1	56.863	232	408	164	5	12	296	72.55	1	403	418	96	96	1	401	418	3.73e-163	465	1196
NV2g000930000.1	NV2t000930001.1	XP_020891871.1	56.776	398	701	268	10	35	498	71.04	26	710	710	96	96	3	684	685	0	807	2085
NV2g000931000.1	NV2t000931001.1	XP_020891848.1	48.91	314	642	240	9	88	407	63.4	33	596	596	95	95	30	661	662	0	612	1577
NV2g000949000.1	NV2t000949001.1	XP_020896389.1	80.743	478	592	107	4	7	529	89.36	1	588	589	99	99	26	614	616	0	949	2452
NV2g000951000.1	NV2t000951001.1	XP_020896147.1	34.1	89	261	113	12	59	132	50.57	84	322	327	73	73	83	306	308	6.82e-17	79.7	195
NV2g000975000.1	NV2t000975001.1	XP_020911954.1	44.118	105	238	117	2	16	158	66.39	13	235	237	94	94	20	256	260	7.63e-67	207	526
NV2g001046000.1	NV2t001046001.1	XP_028514169.1	48.498	113	233	108	5	12	156	66.95	23	254	255	91	91	26	247	274	8.67e-76	231	589
NV2g001047000.1	NV2t001047003.1	XP_028514170.1	33.333	78	234	134	2	22	121	51.71	12	244	249	94	94	9	221	241	3.08e-36	128	322
NV2g001056000.1	NV2t001056001.1	XP_020893444.2	48	132	275	137	2	6	192	69.82	1	275	275	100	100	15	283	283	1.6e-90	270	689
NV2g001122000.1	NV2t001122003.1	XP_020896232.1	46.474	369	794	375	14	50	478	60.2	8	763	827	91	91	9	790	846	0	686	1770
NV2g001170000.1	NV2t001170001.1	XP_020907281.1	66.332	264	398	129	3	5	316	79.4	5	397	449	88	88	4	401	457	2.39e-179	509	1310
NV2g001183000.1	NV2t001183001.1	XP_020905754.1	56.154	219	390	169	1	2	285	73.08	8	395	399	97	97	6	395	401	2.25e-165	469	1207
NV2g001302000.1	NV2t001302001.1	XP_028514987.1	62.778	339	540	188	4	13	418	77.41	1	538	538	100	100	1	529	529	0	690	1781
NV2g001356000.1	NV2t001356001.1	XP_020916813.2	44.611	298	668	350	7	20	402	60.18	17	672	672	98	98	4	663	668	0	570	1468
NV2g001389000.1	NV2t001389001.1	XP_020901691.1	77.303	235	304	69	0	0	265	87.17	1	304	309	98	98	1	304	308	4.38e-175	486	1251
NV2g001477000.1	NV2t001477001.1	XP_020894741.2	78.286	274	350	73	2	3	311	88.86	1	347	351	99	99	1	350	354	0	585	1507
NV2g001605000.1	NV2t001605001.1	XP_020900104.1	61.765	210	340	123	3	7	252	74.12	8	345	345	98	98	1	335	336	1.23e-150	427	1098
NV2g001762000.1	NV2t001762001.1	XP_020901721.1	46.53	181	389	195	6	13	255	65.55	7	385	395	96	96	5	390	390	5.88e-117	345	886
NV2g001823000.1	NV2t001823001.1	XP_020896280.1	74.059	177	239	58	2	4	202	84.52	61	296	307	77	77	26	263	278	3.27e-125	358	920
NV2g001824000.1	NV2t001824001.1	XP_020903367.1	67.391	434	644	190	8	20	509	79.04	1	642	643	99	99	1	626	627	0	874	2259
NV2g001889000.1	NV2t001889001.1	XP_020906526.1	60.297	284	471	181	3	6	369	78.34	1	466	466	100	100	1	470	470	0	598	1543
NV2g001925000.1	NV2t001925001.1	XP_020898660.1	73.948	369	499	129	1	1	446	89.38	4	502	503	99	99	124	621	621	0	796	2055
NV2g002309000.1	NV2t002309001.1	XP_020904137.1	58.889	318	540	218	3	4	413	76.48	25	560	561	96	96	4	543	552	0	687	1772
NV2g002533000.1	NV2t002533001.1	XP_020917508.1	51.429	90	175	81	3	4	122	69.71	1	172	363	47	47	1	174	297	1.59e-59	194	492
NV2g002581000.1	NV2t002581001.1	XP_020911775.1	59.95	241	402	156	4	5	316	78.61	1	398	405	98	98	35	435	440	1.21e-178	504	1299
NV2g002644000.1	NV2t002644001.1	XP_028518793.1	39.242	321	818	431	13	66	475	58.07	5	802	802	99	99	6	777	796	0	574	1479
NV2g002652000.1	NV2t002652001.1	XP_020917509.1	72.425	218	301	75	4	8	248	82.39	7	302	302	98	98	5	302	302	2.34e-146	413	1061
NV2g002702000.1	NV2t002702001.1	XP_020914258.2	53.801	92	171	73	2	6	134	78.36	18	185	185	91	91	10	177	177	2.65e-65	198	503
NV2g002739000.1	NV2t002739003.1	XP_020892065.1	54.749	196	358	157	2	5	257	71.79	20	377	486	74	74	19	371	374	6.92e-148	427	1098
NV2g002743000.1	NV2t002743001.1	XP_028512444.1	47.573	49	103	54	0	0	67	65.05	6	108	119	87	87	8	110	115	2.83e-28	99.8	247
NV2g002966000.1	NV2t002966004.1	XP_020911728.1	87.462	286	327	31	6	10	301	92.05	1	320	320	100	100	1	324	324	0	564	1454
NV2g003092000.1	NV2t003092001.1	XP_020911710.1	78.472	113	144	31	0	0	133	92.36	30	173	176	82	82	4	147	150	3.76e-92	265	676
NV2g003098000.1	NV2t003098001.1	XP_020911177.1	70.356	534	759	218	4	7	636	83.79	16	769	773	98	98	16	772	775	0	1130	2922
NV2g003099000.1	NV2t003099001.1	XP_020911180.1	58.955	79	134	49	2	6	96	71.64	8	140	143	93	93	17	145	147	3.58e-51	159	403
NV2g003135000.1	NV2t003135001.1	XP_020902025.1	69.752	309	443	128	5	6	360	81.26	45	484	495	89	89	1	440	657	0	646	1666
NV2g003222000.1	NV2t003222001.1	XP_020913603.1	67.188	129	192	61	1	2	152	79.17	9	200	202	95	95	9	198	200	9.31e-91	264	675
NV2g003261000.1	NV2t003261001.1	XP_020911779.1	56.115	78	139	59	1	2	103	74.1	10	146	146	94	94	3	141	141	1.44e-52	163	412
NV2g003330000.1	NV2t003330001.1	XP_020902100.2	57.034	373	654	235	11	46	462	70.64	21	636	648	95	95	17	662	670	0	714	1842
NV2g003341000.1	NV2t003341001.1	XP_020914032.1	58.871	219	372	138	2	15	274	73.66	8	379	379	98	98	8	364	364	2.9e-155	441	1134
NV2g003485000.1	NV2t003485001.1	XP_020904176.1	73.773	526	713	186	1	1	601	84.29	16	728	728	98	98	22	733	733	0	1116	2886
NV2g003555000.1	NV2t003555001.1	XP_020899803.1	66.477	117	176	57	1	2	142	80.68	683	856	859	20	20	640	815	815	1.59e-74	260	664
NV2g003609000.1	NV2t003609001.1	XP_020904182.1	45.055	164	364	179	8	21	237	65.11	1	359	359	100	100	1	348	348	4.41e-102	305	780
NV2g003609000.1	NV2t003609002.1	XP_020904180.2	46.707	156	334	159	5	19	211	63.17	25	354	354	93	93	38	356	356	2.28e-94	285	729
NV2g003674000.1	NV2t003674002.1	XP_028513262.1	60.773	330	543	210	2	3	431	79.37	79	619	619	87	87	102	643	643	0	705	1820
NV2g003697000.1	NV2t003697002.1	XP_020902068.1	34.906	37	106	68	1	1	55	51.89	29	134	137	77	77	23	127	130	1.69e-16	70.5	171
NV2g003783000.1	NV2t003783002.1	XP_020905224.1	73.568	565	768	157	16	46	630	82.03	8	742	760	97	97	240	994	994	0	1074	2777
NV2g003818000.1	NV2t003818001.1	XP_028516158.1	48.193	80	166	81	2	5	115	69.28	71	233	239	68	68	1	164	169	2.82e-51	164	415
NV2g003876000.1	NV2t003876001.1	XP_020906985.1	59.88	200	334	129	3	5	240	71.86	111	440	441	75	75	70	402	421	5.26e-141	410	1053
NV2g003951000.1	NV2t003951002.1	XP_028516166.1	63.889	138	216	74	1	4	164	75.93	67	282	580	37	37	1	212	254	1.5e-101	307	787
NV2g004006000.1	NV2t004006001.1	XP_020912042.1	55.932	231	413	149	7	33	280	67.8	6	397	397	99	99	5	405	405	8.2e-143	412	1058
NV2g004066000.1	NV2t004066001.1	XP_020897811.1	50.256	1470	2925	1400	32	55	1964	67.15	1247	4144	4146	72	70	312	3208	5213	0	3053	7916
NV2g004093000.1	NV2t004093001.1	XP_020901714.1	39.502	111	281	151	6	19	162	57.65	31	304	319	86	86	28	296	327	7.5e-58	189	480
NV2g004150000.1	NV2t004150001.1	XP_020894407.1	56.389	203	360	141	5	16	261	72.5	9	352	363	95	95	7	366	374	1.43e-141	406	1044
NV2g004218000.1	NV2t004218001.1	XP_028516499.1	68.035	315	463	140	2	8	371	80.13	4	465	681	68	68	20	475	971	0	709	1830
NV2g004231000.1	NV2t004231001.1	XP_028514113.1	59.079	231	391	160	0	0	300	76.73	50	440	449	87	87	47	437	444	0	521	1341
NV2g004233000.1	NV2t004233001.1	XP_020897136.1	60.471	231	382	143	5	8	282	73.82	74	452	457	83	83	5	381	384	5.07e-164	467	1202
NV2g004235000.1	NV2t004235001.1	XP_020897146.1	56.818	225	396	155	6	16	276	69.7	13	404	407	96	96	5	388	450	5.19e-149	430	1105
NV2g004258000.1	NV2t004258001.1	XP_020899850.1	74.627	350	469	117	1	2	418	89.13	1	469	470	99	99	1	467	469	0	723	1866
NV2g004478000.1	NV2t004478001.1	XP_020895242.1	44.355	110	248	128	4	10	156	62.9	28	270	271	90	90	1	243	243	4.54e-70	216	550
NV2g004506000.1	NV2t004506001.1	XP_020902424.1	74.468	105	141	36	0	0	123	87.23	30	170	174	81	81	43	183	187	5.52e-81	238	606
NV2g004511000.1	NV2t004511001.1	XP_020915626.1	47.443	167	352	141	12	44	205	58.24	13	351	361	94	94	30	350	366	1.27e-75	238	606
NV2g004530000.1	NV2t004530001.1	XP_020905748.1	44.444	120	270	130	7	20	163	60.37	7	266	266	98	98	10	269	270	6.33e-59	188	477
NV2g004676000.1	NV2t004676001.1	XP_020894369.1	66.512	286	430	143	1	1	356	82.79	1	430	432	99	99	1	429	432	0	632	1630
NV2g004684000.1	NV2t004684001.1	XP_020911724.1	47.716	94	197	101	1	2	135	68.53	6	200	223	87	87	2	198	216	2.06e-62	194	492
NV2g004791000.1	NV2t004791002.1	XP_028513941.1	36.834	470	1276	684	36	122	705	55.25	3	1213	1276	95	95	158	1376	1419	0	784	2025
NV2g004794000.1	NV2t004794001.1	XP_020892946.1	54.434	178	327	128	5	21	222	67.89	9	333	333	98	98	6	313	313	3.72e-116	338	867
NV2g005100000.1	NV2t005100001.1	XP_020915537.2	51.19	172	336	158	4	6	231	68.75	74	409	420	80	80	1	330	337	3.07e-124	363	931
NV2g005136000.1	NV2t005136001.1	XP_020903097.1	62.273	274	440	166	0	0	339	77.05	12	451	453	97	97	7	446	447	0	592	1527
NV2g005137000.1	NV2t005137001.1	XP_020903068.1	68.765	284	413	127	2	2	340	82.32	21	433	466	89	89	18	428	433	0	609	1570
NV2g005138000.1	NV2t005138001.1	XP_020903083.1	57.798	252	436	174	2	10	329	75.46	1	426	432	99	99	1	436	436	0	548	1412
NV2g005160000.1	NV2t005160002.1	XP_020915584.1	57.789	230	398	165	3	3	299	75.13	7	403	403	99	99	2	397	399	2.83e-176	497	1279
NV2g005194000.1	NV2t005194001.1	XP_020912056.1	45.868	111	242	103	3	28	146	60.33	1	230	235	98	98	1	226	228	5.95e-60	188	478
NV2g005199000.1	NV2t005199002.1	XP_020912067.1	80.682	213	264	50	1	1	229	86.74	1	264	264	100	100	1	263	263	5.18e-134	379	972
NV2g005200000.1	NV2t005200001.1	XP_020912058.1	84.387	227	269	42	0	0	241	89.59	3	271	295	91	91	1	269	292	7.53e-131	373	958
NV2g005232000.1	NV2t005232001.1	XP_020913511.1	37.603	91	242	98	5	53	122	50.41	1	240	242	99	99	1	191	192	6.42e-34	120	302
NV2g005234000.1	NV2t005234001.1	XP_020910809.1	65.714	92	140	46	2	2	114	81.43	7	146	146	96	96	10	147	147	1.22e-51	160	406
NV2g005582000.1	NV2t005582001.1	XP_020903872.1	50.559	226	447	193	3	28	298	66.67	1	447	450	99	99	1	419	424	2.61e-150	434	1115
NV2g005704000.1	NV2t005704001.1	XP_020895473.1	66.891	398	595	180	6	17	479	80.5	13	599	599	99	98	628	1213	1213	0	842	2174
NV2g005916000.1	NV2t005916001.1	XP_028513462.1	57.838	535	925	357	6	33	672	72.65	522	1427	1934	73	47	362	1272	2181	0	1140	2949
NV2g005917000.1	NV2t005917001.1	XP_028513461.1	67.805	417	615	166	7	32	477	77.56	82	668	779	90	75	768	1378	1394	0	805	2078
NV2g005918000.1	NV2t005918002.1	XP_020895456.1	57.216	448	783	308	11	27	554	70.75	30	795	903	85	85	2	774	1246	0	885	2286
NV2g005948000.1	NV2t005948001.1	XP_020911606.1	60.39	279	462	171	6	12	337	72.94	58	512	534	95	85	1	457	507	0	572	1473
NV2g005949000.1	NV2t005949001.1	XP_020911552.1	44.653	405	907	388	16	114	554	61.08	1	813	1746	73	47	7235	8121	8159	0	729	1883
NV2g005954000.1	NV2t005954001.1	XP_028518070.1	43.162	101	234	121	5	12	137	58.55	36	265	1180	21	19	17	242	2468	4.84e-54	207	528
NV2g006032000.1	NV2t006032001.1	XP_020892025.1	52.807	254	481	219	4	8	338	70.27	18	494	549	87	87	14	490	531	1.69e-172	498	1282
NV2g006072000.1	NV2t006072001.1	XP_020892036.1	43.011	40	93	40	5	13	55	59.14	1	83	91	91	91	1	90	101	3.25e-14	62.4	150
NV2g006073000.1	NV2t006073001.1	XP_020892035.1	67.544	77	114	33	3	4	90	78.95	10	123	125	91	91	13	122	124	1.57e-50	156	395
NV2g006103000.1	NV2t006103001.1	XP_028512545.1	44.872	35	78	42	1	1	55	70.51	483	559	797	10	10	358	435	606	8.77e-10	62.4	150
NV2g006117000.1	NV2t006117001.1	XP_020895419.1	62.5	130	208	64	6	14	160	76.92	4	203	203	99	99	5	206	206	1.19e-80	239	609
NV2g006119000.1	NV2t006119001.1	XP_020895425.1	56.803	167	294	106	4	21	216	73.47	1	286	287	99	99	1	281	283	8.78e-104	304	778
NV2g006162000.1	NV2t006162001.1	XP_028517407.1	55.937	179	320	136	3	5	224	70	216	530	1143	28	28	60	379	1415	2.65e-116	393	1009
NV2g006163000.1	NV2t006163001.1	XP_020909477.1	65.845	187	284	96	1	1	227	79.93	30	312	411	69	69	6	289	298	8.45e-122	355	911
NV2g006240000.1	NV2t006240001.1	XP_020898076.1	56.38	190	337	126	5	21	235	69.73	19	334	362	87	87	17	353	389	3.82e-125	365	937
NV2g006259000.1	NV2t006259001.1	XP_020900726.1	52.759	153	290	108	11	29	198	68.28	1	274	275	99	99	1	277	346	2.17e-86	261	667
NV2g006295000.1	NV2t006295002.1	XP_020897284.1	43.038	68	158	84	3	6	103	65.19	724	876	878	17	17	698	854	856	1.13e-29	126	317
NV2g006346000.1	NV2t006346001.1	XP_020902052.1	38.272	124	324	177	7	23	191	58.95	681	1000	1000	32	32	720	1024	1024	7.93e-64	234	597
NV2g006401000.1	NV2t006401002.1	XP_020908901.1	74.074	200	270	60	2	10	222	82.22	70	339	339	80	80	5	264	264	6.31e-131	374	960
NV2g006436000.1	NV2t006436001.1	XP_020894030.1	43.82	195	445	221	7	29	290	65.17	345	761	774	54	54	14	457	460	2.74e-128	390	1002
NV2g006437000.1	NV2t006437001.1	XP_028515273.1	53.034	201	379	151	5	27	254	67.02	340	700	725	60	50	405	774	813	1.11e-121	383	983
NV2g006438000.1	NV2t006438001.1	XP_020901877.2	55.145	209	379	152	7	18	262	69.13	1	368	505	73	73	9	380	397	5.36e-143	416	1070
NV2g006439000.1	NV2t006439001.1	XP_020901876.2	46.951	562	1197	486	29	149	685	57.23	52	1198	1524	81	75	22	1119	1138	0	885	2286
NV2g006441000.1	NV2t006441001.1	XP_028512553.1	53.288	470	882	315	21	97	584	66.21	423	1275	1275	67	67	378	1191	1191	0	889	2297
NV2g006443000.1	NV2t006443001.1	XP_020892012.1	34.242	339	990	486	32	165	463	46.77	363	1338	1360	72	72	349	1187	1187	2.33e-141	462	1189
NV2g006444000.1	NV2t006444001.1	XP_020892055.2	53.425	663	1241	507	21	71	844	68.01	3	1193	1275	93	93	1	1220	2195	0	1271	3289
NV2g006479000.1	NV2t006479001.1	XP_020895373.1	65.333	196	300	97	3	7	237	79	102	398	400	74	74	60	355	368	1.8e-149	427	1099
NV2g006480000.1	NV2t006480001.1	XP_020906055.1	47.111	106	225	107	5	12	146	64.89	114	332	332	66	66	174	392	392	1.97e-60	198	503
NV2g006484000.1	NV2t006484001.1	XP_020892015.1	54.83	210	383	161	4	12	263	68.67	9	385	385	98	98	1	377	377	2.6e-136	394	1011
NV2g006485000.1	NV2t006485001.1	XP_020892056.2	58.84	213	362	123	3	26	272	75.14	1	350	350	100	100	1	348	348	1.42e-161	455	1171
NV2g006517000.1	NV2t006517001.1	XP_020912793.1	68.951	322	467	145	0	0	380	81.37	1	467	467	100	100	1	467	467	0	700	1807
NV2g006709000.1	NV2t006709001.1	XP_020893097.1	39.429	276	700	401	15	23	408	58.29	31	716	768	89	89	5	695	701	1.4e-166	497	1280
NV2g006716000.1	NV2t006716003.1	XP_020911633.1	52.751	163	309	92	5	54	196	63.43	2	294	294	99	99	3	273	273	1.15e-104	306	783
NV2g006786000.1	NV2t006786004.1	XP_020894006.1	65.293	412	631	179	16	40	477	75.59	1	604	604	100	100	1	618	618	0	719	1857
NV2g006788000.1	NV2t006788001.1	XP_028513450.1	55.971	689	1231	396	34	146	830	67.42	1	1148	1148	100	100	1	1168	1168	0	1200	3104
NV2g006826000.1	NV2t006826001.1	XP_020895935.1	29.783	151	507	240	25	116	217	42.8	1	442	442	100	100	1	456	456	4.25e-28	115	289
NV2g006994000.1	NV2t006994001.1	XP_028515182.1	57.655	177	307	114	3	16	217	70.68	327	632	639	87	48	218	509	521	1.44e-110	342	877
NV2g007009000.1	NV2t007009001.1	XP_020899961.1	66.284	289	436	145	2	2	363	83.26	3	437	437	99	99	5	439	439	0	612	1579
NV2g007012000.1	NV2t007012001.1	XP_028515160.1	47.576	157	330	165	2	8	219	66.36	1	328	344	95	95	1	324	339	6.14e-110	323	829
NV2g007139000.1	NV2t007139001.1	XP_020916401.1	48.867	151	309	143	5	15	205	66.34	35	331	338	88	88	39	344	344	1.08e-102	305	781
NV2g007273000.1	NV2t007273001.1	XP_020900114.1	59.737	227	380	141	2	12	282	74.21	1	374	374	100	100	1	374	375	2.88e-153	436	1122
NV2g007357000.1	NV2t007357001.1	XP_028519197.1	50	207	414	188	4	19	280	67.63	3	409	465	89	88	7	408	605	1.14e-154	452	1163
NV2g007733000.1	NV2t007733001.1	XP_020907288.1	64.747	281	434	139	2	14	342	78.8	1	432	808	53	53	1	422	422	0	607	1566
NV2g008258000.1	NV2t008258001.1	XP_020910601.1	44.865	166	370	182	5	22	228	61.62	332	700	701	53	53	77	425	426	1.59e-103	323	827
NV2g008259000.1	NV2t008259003.1	XP_028517767.1	44.168	390	883	423	13	70	549	62.17	1378	2247	2251	91	39	586	1411	2201	0	685	1767
NV2g008284000.1	NV2t008284001.1	XP_020905569.1	46.099	130	282	129	7	23	173	61.35	215	486	486	56	56	191	459	462	2.8e-78	251	642
NV2g008324000.1	NV2t008324001.1	XP_020892569.1	85.714	18	21	3	0	0	19	90.48	1	21	52	40	40	66	86	127	6.67e-08	45.1	105
NV2g008413000.1	NV2t008413001.1	XP_028516238.1	33.745	82	243	153	5	8	133	54.73	95	330	458	52	52	94	335	941	2.51e-36	142	359
NV2g008415000.1	NV2t008415001.1	XP_028516239.1	38.462	65	169	61	7	43	85	50.3	162	308	789	32	19	177	324	717	1.21e-18	90.9	224
NV2g008421000.1	NV2t008421001.1	XP_020908497.1	63.158	324	513	156	14	33	392	76.41	135	626	626	79	79	41	541	541	0	614	1583
NV2g008600000.1	NV2t008600001.1	XP_020915285.1	31.29	194	620	382	13	44	314	50.65	6	603	624	96	96	7	604	627	6.18e-93	299	766
NV2g008625000.1	NV2t008625001.1	XP_020904026.1	68.539	366	534	154	6	14	430	80.52	1	525	525	100	100	1	529	529	0	744	1921
NV2g008635000.1	NV2t008635001.1	XP_028516243.1	57.732	224	388	160	4	4	293	75.52	301	687	734	92	53	387	771	1555	1.8e-120	395	1014
NV2g008660000.1	NV2t008660001.1	XP_020912202.1	69.582	1647	2367	576	37	144	1906	80.52	2	2289	2289	99	99	1	2302	2302	0	3178	8239
NV2g008737000.1	NV2t008737001.1	XP_028518260.1	64.393	472	733	239	9	22	575	78.44	1	725	725	100	100	1	719	719	0	945	2442
NV2g008766000.1	NV2t008766001.1	XP_020895695.1	73.815	327	443	111	3	5	379	85.55	1	442	443	99	99	9	447	448	0	701	1810
NV2g008962000.1	NV2t008962001.1	XP_020892610.1	56.278	251	446	184	5	11	331	74.22	16	459	483	92	92	14	450	474	0	543	1399
NV2g008976000.1	NV2t008976001.1	XP_020910353.2	75.604	657	869	171	11	41	718	82.62	2	836	860	97	97	1	862	891	0	1326	3432
NV2g008977000.1	NV2t008977001.1	XP_028517707.1	51.002	458	898	321	12	119	584	65.03	20	903	1049	84	84	14	806	1734	0	865	2234
NV2g009104000.1	NV2t009104001.1	XP_020908653.1	42.194	100	237	121	7	16	144	60.76	1	228	228	100	100	3	232	234	1.35e-51	167	422
NV2g009190000.1	NV2t009190002.1	XP_028516819.1	41.667	115	276	147	7	14	163	59.06	31	297	299	89	89	22	292	292	2.09e-65	207	526
NV2g009203000.1	NV2t009203002.1	XP_020914423.2	52.26	289	553	244	8	20	377	68.17	18	563	565	97	97	1	540	543	0	566	1458
NV2g009497000.1	NV2t009497003.1	XP_028516436.1	47.317	97	205	92	3	16	120	58.54	36	230	252	77	77	40	238	260	3.72e-48	160	404
NV2g009503000.1	NV2t009503001.1	XP_028516435.1	39.151	83	212	110	8	19	116	54.72	40	240	495	41	41	13	216	377	1.18e-31	125	314
NV2g009504000.1	NV2t009504001.1	XP_020906235.1	34.648	123	355	209	11	23	175	49.3	1	354	369	96	96	1	333	356	3.73e-46	161	407
NV2g009507000.1	NV2t009507001.1	XP_020902809.1	37.281	85	228	139	1	4	134	58.77	11	238	552	41	41	14	237	283	1.96e-45	161	408
NV2g009508000.1	NV2t009508001.1	XP_020902803.1	47.756	149	312	140	5	23	189	60.58	108	415	415	74	74	183	475	491	1.72e-87	274	700
NV2g009511000.1	NV2t009511001.1	XP_028516916.1	76.406	978	1280	268	10	34	1109	86.64	45	1316	1316	99	97	1761	3014	3578	0	2014	5218
NV2g009534000.1	NV2t009534001.1	XP_020902722.1	49.502	149	301	110	13	42	188	62.46	44	322	348	80	80	39	319	343	3.57e-81	251	640
NV2g009655000.1	NV2t009655001.1	XP_020902827.1	36.704	294	801	345	21	162	386	48.19	15	724	788	90	90	17	746	751	8.79e-142	436	1120
NV2g009676000.1	NV2t009676001.1	XP_020904983.1	47.586	138	290	140	7	12	198	68.28	1	281	335	84	84	1	287	362	2.02e-90	274	701
NV2g009738000.1	NV2t009738001.1	XP_020892811.1	41.606	57	137	65	4	15	74	54.01	5	131	233	55	55	6	137	326	4.94e-23	95.1	235
NV2g009740000.1	NV2t009740001.1	XP_020892770.2	45.051	132	293	116	9	45	162	55.29	20	285	321	83	83	5	279	314	1.52e-50	170	430
NV2g009746000.1	NV2t009746001.1	XP_020892808.1	42.712	126	295	140	7	29	170	57.63	1	278	341	82	82	1	283	317	2.48e-49	167	424
NV2g009747000.1	NV2t009747001.1	XP_020892807.1	70.482	117	166	41	3	8	124	74.7	42	203	252	64	64	155	316	326	1.79e-55	181	458
NV2g009810000.1	NV2t009810001.1	XP_020902732.1	60.971	314	515	198	1	3	408	79.22	9	523	527	98	98	76	587	587	0	692	1786
NV2g009849000.1	NV2t009849001.1	XP_020901735.1	57.361	526	917	367	10	24	655	71.43	10	910	910	99	99	10	918	918	0	1054	2726
NV2g009862000.1	NV2t009862001.1	XP_020902842.1	62.105	177	285	107	1	1	228	80	17	300	300	95	95	8	292	298	8.15e-143	404	1037
NV2g009863000.1	NV2t009863001.1	XP_028515521.1	56.667	323	570	228	9	19	407	71.4	1	559	561	99	99	1	562	563	0	617	1592
NV2g009872000.1	NV2t009872001.1	XP_020916533.1	34.192	199	582	234	17	149	248	42.61	70	574	579	87	87	1	510	514	5.16e-65	221	563
NV2g009880000.1	NV2t009880001.1	XP_020904485.1	48.101	76	158	73	5	9	97	61.39	31	187	427	37	37	14	163	718	4.52e-34	134	338
NV2g010004000.1	NV2t010004001.1	XP_020903206.1	70.044	159	227	62	3	6	184	81.06	19	240	241	92	92	1	226	226	8.29e-116	330	846
NV2g010005000.1	NV2t010005001.1	XP_028515664.1	56.039	116	207	83	3	8	145	70.05	3	206	206	99	99	4	205	205	1.54e-79	236	602
NV2g010006000.1	NV2t010006001.1	XP_020903209.1	83.234	139	167	28	0	0	146	87.43	27	193	193	87	87	22	188	195	2.87e-102	293	749
NV2g010077000.1	NV2t010077002.1	XP_020902808.1	58.642	190	324	119	4	15	225	69.44	1	312	312	100	100	1	321	323	2.79e-135	386	992
NV2g010134000.1	NV2t010134001.1	XP_028515538.1	77.679	87	112	25	0	0	101	90.18	58	169	212	53	53	115	226	226	4.04e-63	195	496
NV2g010217000.1	NV2t010217004.1	XP_020904458.1	64.496	307	476	166	2	3	372	78.15	19	492	492	96	96	1	475	475	0	660	1703
NV2g010248000.1	NV2t010248001.1	XP_028515233.1	52.174	84	161	72	2	5	107	66.46	384	544	544	30	30	86	241	242	9.94e-51	174	441
NV2g010271000.1	NV2t010271001.1	XP_028517566.1	80.132	242	302	59	1	1	269	89.07	1	302	302	100	100	1	301	301	0	517	1332
NV2g010316000.1	NV2t010316001.1	XP_020906562.1	55.28	89	161	70	2	2	109	67.7	1	159	164	97	97	11	171	171	3.13e-58	179	454
NV2g010332000.1	NV2t010332001.1	XP_020892745.1	68.846	358	520	102	11	60	389	74.81	1	497	545	91	91	1	483	529	0	629	1622
NV2g010334000.1	NV2t010334001.1	XP_020892776.1	59.155	84	142	45	3	13	100	70.42	8	137	911	50	14	7	147	1023	6.83e-41	162	411
NV2g010341000.1	NV2t010341001.1	XP_020892801.1	46.001	627	1363	496	42	240	785	57.59	1	1279	1292	100	99	12	1218	4799	0	857	2215
NV2g010343000.1	NV2t010343001.1	XP_020892805.1	68.675	114	166	26	7	26	125	75.3	564	725	725	22	22	632	775	866	1.27e-33	138	348
NV2g010358000.1	NV2t010358001.1	XP_020906574.1	61.25	49	80	31	0	0	64	80	403	482	492	41	16	267	346	353	1.05e-24	105	261
NV2g010387000.1	NV2t010387001.1	XP_028515554.1	51.157	442	864	317	15	105	560	64.81	198	990	1495	79	53	705	1534	2167	0	866	2238
NV2g010388000.1	NV2t010388001.1	XP_020902757.1	41.333	124	300	163	6	13	177	59	324	611	891	58	32	248	546	825	6.79e-72	253	647
NV2g010390000.1	NV2t010390001.1	XP_028515540.1	56.838	266	468	183	5	19	338	72.22	38	498	759	61	61	2	457	1168	0	584	1506
NV2g010391000.1	NV2t010391001.1	XP_020902829.1	49.713	173	348	171	2	4	237	68.1	475	822	885	39	39	28	371	1170	5.12e-115	379	972
NV2g010432000.1	NV2t010432001.1	XP_020900586.1	49.471	187	378	179	5	12	252	66.67	53	421	430	86	86	1	375	389	5.38e-134	390	1002
NV2g010470000.1	NV2t010470001.1	XP_028513096.1	57.059	97	170	72	1	1	120	70.59	27	196	1495	11	11	8	176	852	3.47e-60	223	569
NV2g010539000.1	NV2t010539001.1	XP_020916543.1	60.759	432	711	268	8	11	546	76.79	1	703	924	99	76	1	708	714	0	893	2307
NV2g010559000.1	NV2t010559001.1	XP_020902793.1	62.36	111	178	61	3	6	140	78.65	49	225	225	79	79	33	205	205	7.07e-66	202	514
NV2g010560000.1	NV2t010560001.1	XP_020902792.1	71.028	304	428	121	2	3	360	84.11	9	436	437	98	98	9	433	434	0	653	1685
NV2g010591000.1	NV2t010591001.1	XP_028519457.1	35.059	474	1352	657	36	221	669	49.48	25	1330	1334	98	98	51	1227	1231	0	711	1834
NV2g010615000.1	NV2t010615001.1	XP_020898810.2	48.928	251	513	224	8	38	346	67.45	465	971	987	64	51	455	935	943	1.95e-154	481	1237
NV2g010629000.1	NV2t010629001.1	XP_020907555.1	35.376	254	718	298	25	166	357	49.72	1	666	666	100	100	82	685	685	8.76e-90	293	751
NV2g010671000.1	NV2t010671001.1	XP_028519108.1	32.381	204	630	385	15	41	333	52.86	1	604	606	99	99	1	615	618	1.14e-95	305	782
NV2g010686000.1	NV2t010686001.1	XP_020917254.1	80.392	41	51	10	0	0	41	80.39	1	51	181	28	28	1	51	144	8.04e-17	73.2	178
NV2g010696000.1	NV2t010696003.1	XP_020900668.1	58.398	379	649	255	5	15	487	75.04	27	675	675	96	96	41	674	674	0	782	2020
NV2g010782000.1	NV2t010782001.1	XP_028513564.1	71.351	396	555	148	4	11	454	81.8	7	558	561	98	98	3	549	552	0	811	2094
NV2g010892000.1	NV2t010892001.1	XP_020905436.1	42.623	52	122	70	0	0	84	68.85	91	212	213	57	57	222	343	463	4.37e-31	118	295
NV2g010897000.1	NV2t010897001.1	XP_020893091.1	62.308	243	390	128	8	19	293	75.13	1	381	382	99	99	1	380	381	6.59e-167	471	1213
NV2g010995000.1	NV2t010995001.1	XP_028516349.1	62.804	336	535	172	5	27	402	75.14	1	513	529	99	97	521	1050	1087	0	636	1640
NV2g010997000.1	NV2t010997001.1	XP_020905931.1	41.458	364	878	404	19	110	503	57.29	987	1839	1839	56	46	439	1231	1231	2.57e-175	565	1457
NV2g011025000.1	NV2t011025001.1	XP_028519662.1	50.873	204	401	156	12	41	256	63.84	1	397	399	99	99	4	367	369	2.52e-114	338	867
NV2g011028000.1	NV2t011028001.1	XP_020906022.1	67.424	178	264	78	1	8	215	81.44	1	264	471	95	56	1	256	381	1.82e-130	382	982
NV2g011056000.1	NV2t011056001.1	XP_020898813.1	68.85	389	565	141	3	35	445	78.76	7	569	583	97	97	7	538	550	0	793	2047
NV2g011057000.1	NV2t011057002.1	XP_020899695.1	50.938	516	1013	456	17	41	713	70.38	7	1000	1004	99	99	12	1002	1005	0	1011	2614
NV2g011077000.1	NV2t011077001.1	XP_020906039.1	60.531	319	527	195	5	13	402	76.28	4	523	538	97	97	5	525	547	0	665	1716
NV2g011117000.1	NV2t011117001.1	XP_020893184.1	41.687	173	415	215	8	27	240	57.83	24	435	457	90	90	6	396	413	9.3e-93	286	733
NV2g011163000.1	NV2t011163001.1	XP_028516603.1	68.61	153	223	70	0	0	192	86.1	43	265	269	83	83	1	223	224	4.52e-106	306	785
NV2g011286000.1	NV2t011286001.1	XP_028519710.1	72.771	302	415	104	2	9	353	85.06	1	406	902	45	45	1356	1770	2048	0	643	1659
NV2g011289000.1	NV2t011289001.1	XP_020917289.1	36.179	89	246	133	8	24	131	53.25	1	233	816	29	29	1	235	1615	2.46e-38	154	390
NV2g011317000.1	NV2t011317002.1	XP_020899119.1	68.908	246	357	104	3	7	289	80.95	6	361	418	85	85	5	355	355	8.34e-179	502	1293
NV2g011375000.1	NV2t011375001.1	XP_020902629.1	32.809	146	445	268	12	31	225	50.56	27	458	476	91	91	14	440	442	1.31e-51	181	458
NV2g011394000.1	NV2t011394001.1	XP_028515484.1	60.392	462	765	262	12	41	548	71.63	9	755	760	98	98	10	751	763	0	923	2386
NV2g011395000.1	NV2t011395001.1	XP_020902637.1	64.815	140	216	67	3	9	167	77.31	2	212	215	98	98	5	216	220	4.25e-100	289	739
NV2g011584000.1	NV2t011584001.1	XP_028517924.1	93.126	420	451	31	0	0	438	97.12	6	456	468	96	96	113	563	575	0	864	2232
NV2g011665000.1	NV2t011665001.1	XP_020898782.1	63.535	284	447	160	2	3	342	76.51	1	447	447	100	100	1	444	448	0	582	1501
NV2g011673000.1	NV2t011673001.1	XP_020898804.1	65.779	346	526	172	5	8	406	77.19	55	576	582	90	90	7	528	533	0	670	1728
NV2g011675000.1	NV2t011675001.1	XP_020898797.1	46.059	298	647	318	11	31	417	64.45	1	629	642	98	98	1	634	635	0	583	1504
NV2g011720000.1	NV2t011720001.1	XP_020898756.1	58.549	113	193	65	2	15	127	65.8	1	185	267	69	69	1	186	283	1.06e-23	97.1	240
NV2g011723000.1	NV2t011723001.1	XP_020898759.1	74.545	123	165	37	2	5	133	80.61	24	183	206	78	78	13	177	222	3.03e-24	95.5	236
NV2g011797000.1	NV2t011797001.1	XP_028519684.1	36.72	618	1683	996	37	69	920	54.66	168	1800	1800	91	91	1	1664	2323	0	1042	2695
NV2g011802000.1	NV2t011802003.1	XP_020903397.1	53.352	191	358	164	3	3	274	76.54	60	416	428	83	83	51	406	418	1.25e-135	395	1015
NV2g011820000.1	NV2t011820001.1	XP_020894246.1	62.963	68	108	39	1	1	81	75	1	108	125	86	86	1	107	132	5.1e-16	68.9	167
NV2g011823000.1	NV2t011823001.1	XP_020893124.1	40.909	135	330	148	10	47	167	50.61	22	314	343	85	85	16	335	389	3.89e-55	184	468
NV2g011824000.1	NV2t011824001.1	XP_020893121.1	50.439	345	684	291	20	48	433	63.3	10	670	675	98	98	11	669	671	0	608	1567
NV2g011825000.1	NV2t011825001.1	XP_020893123.1	48.708	132	271	100	13	39	154	56.83	136	386	389	65	65	141	392	394	2.75e-38	141	356
NV2g011829000.1	NV2t011829001.1	XP_020906808.1	55.926	571	1021	426	14	24	736	72.09	2	1007	1007	99	99	1	1012	1012	0	1181	3056
NV2g012143000.1	NV2t012143001.1	XP_028516702.1	49.153	58	118	57	2	3	73	61.86	20	134	529	22	22	21	138	1412	1.2e-29	124	311
NV2g012144000.1	NV2t012144001.1	XP_020907099.1	50.413	122	242	98	6	22	165	68.18	725	960	964	24	24	1	226	244	7.65e-75	246	627
NV2g012315000.1	NV2t012315001.1	XP_020893195.2	84.255	396	470	72	2	2	421	89.57	85	553	559	84	84	87	555	559	0	822	2123
NV2g012363000.1	NV2t012363001.1	XP_028517155.1	63.908	278	435	157	0	0	349	80.23	5	439	440	99	99	1	435	436	0	607	1566
NV2g012483000.1	NV2t012483001.1	XP_020917312.1	70.523	256	363	102	1	5	305	84.02	1	363	363	100	100	1	358	358	0	542	1396
NV2g012500000.1	NV2t012500001.1	XP_028519713.1	38.997	280	718	408	14	30	428	59.61	1	693	695	99	99	1	713	767	7.03e-178	526	1354
NV2g012511000.1	NV2t012511001.1	XP_020907087.1	80.097	495	618	120	2	3	542	87.7	1	617	617	100	100	1	616	618	0	1018	2632
NV2g012529000.1	NV2t012529002.1	XP_020917227.1	56.818	325	572	230	8	17	413	72.2	31	590	596	94	94	20	586	587	0	660	1703
NV2g012533000.1	NV2t012533001.1	XP_028518332.1	39.412	67	170	83	5	20	88	51.76	28	196	230	73	73	26	176	262	4.5e-23	94	232
NV2g012534000.1	NV2t012534001.1	XP_028518333.1	33.194	238	717	336	26	143	346	48.26	3	666	713	93	93	4	630	675	1.72e-64	226	577
NV2g012535000.1	NV2t012535001.1	XP_020903788.2	39.32	162	412	184	14	66	212	51.46	85	476	569	69	69	109	474	492	4.86e-61	209	533
NV2g012538000.1	NV2t012538001.1	XP_020912502.1	28.193	181	642	288	27	173	281	43.77	224	750	750	70	70	2093	2676	2676	4.29e-51	194	492
NV2g012539000.1	NV2t012539001.1	XP_020912500.1	28.414	181	637	312	19	144	271	42.54	1	547	595	92	92	1	583	606	3.17e-35	140	353
NV2g012540000.1	NV2t012540001.1	XP_020907438.1	46.541	74	159	82	2	3	97	61.01	41	198	198	80	80	1	157	157	2.05e-41	137	345
NV2g012552000.1	NV2t012552001.1	XP_028513370.1	35.083	127	362	167	15	68	179	49.45	12	348	366	92	92	16	334	350	7.25e-44	155	391
NV2g012553000.1	NV2t012553001.1	XP_020895142.2	49.701	83	167	66	6	18	108	64.67	695	852	917	36	17	367	524	600	1.32e-33	137	346
NV2g012554000.1	NV2t012554001.1	XP_028513369.1	49.042	128	261	120	3	13	179	68.58	7	265	764	81	34	15	264	718	3.13e-64	228	580
NV2g012555000.1	NV2t012555001.1	XP_020895102.1	58.252	180	309	124	2	5	249	80.58	1	306	306	100	100	1	307	307	7.76e-134	382	980
NV2g012573000.1	NV2t012573001.1	XP_020904531.1	52.245	128	245	113	3	4	168	68.57	45	286	286	85	85	48	291	291	1.24e-80	245	625
NV2g012589000.1	NV2t012589001.1	XP_020917413.1	55.502	232	418	173	6	13	295	70.57	14	426	428	96	96	7	416	424	9.48e-176	498	1281
NV2g012691000.1	NV2t012691002.1	XP_020893112.1	45.283	120	265	111	7	34	144	54.34	379	625	642	38	38	414	662	673	5.6e-50	184	468
NV2g012695000.1	NV2t012695003.1	XP_020906839.1	64.454	437	678	198	12	43	504	74.34	77	720	721	89	89	63	731	732	0	813	2101
NV2g012708000.1	NV2t012708001.1	XP_020892842.1	35.011	153	437	188	18	96	213	48.74	1	395	398	99	99	1	383	386	2.39e-44	158	399
NV2g012709000.1	NV2t012709001.1	XP_020892905.1	45.333	102	225	86	9	37	130	57.78	1	214	380	56	56	1	199	355	9.91e-48	166	419
NV2g012782000.1	NV2t012782001.1	XP_028516621.1	37.855	293	774	330	28	151	405	52.33	40	734	790	88	88	47	748	942	1.67e-96	321	823
NV2g012783000.1	NV2t012783001.1	XP_020906867.1	56.627	94	166	60	4	12	118	71.08	8	172	172	96	96	773	927	934	3.08e-57	192	488
NV2g012788000.1	NV2t012788001.1	XP_020895108.1	44.898	110	245	122	4	13	148	60.41	7	251	254	96	96	7	238	245	2.59e-66	206	523
NV2g012806000.1	NV2t012806001.1	XP_020917613.1	60.125	193	321	124	2	4	241	75.08	20	336	336	94	94	4	324	336	1e-134	386	992
NV2g012814000.1	NV2t012814003.1	XP_028519671.1	42.482	178	419	181	16	60	234	55.85	1	404	407	99	99	1	374	376	4.86e-81	253	647
NV2g012871000.1	NV2t012871001.1	XP_028518183.1	72.512	153	211	50	3	8	176	83.41	1	209	212	99	99	1	205	205	1.3e-105	302	774
NV2g012871000.1	NV2t012871003.1	XP_020911934.1	68.153	214	314	89	4	11	253	80.57	27	336	339	91	91	25	331	331	1.37e-150	426	1096
NV2g012871000.1	NV2t012871004.1	XP_028518181.1	69.266	151	218	59	3	8	176	80.73	34	249	252	86	86	1	212	212	1.31e-103	299	766
NV2g012896000.1	NV2t012896001.1	XP_020910508.1	57.337	211	368	150	5	7	267	72.55	520	886	890	41	41	593	954	957	5.44e-151	469	1207
NV2g012897000.1	NV2t012897001.1	XP_020910502.1	61.351	227	370	125	9	18	284	76.76	1	357	357	100	100	1	365	365	2.41e-158	448	1152
NV2g012900000.1	NV2t012900001.1	XP_020907961.1	48.797	142	291	143	5	6	192	65.98	15	300	311	92	92	6	295	298	1.98e-92	276	707
NV2g012942000.1	NV2t012942001.1	XP_020895074.1	45.755	97	212	93	7	22	129	60.85	1	192	198	97	97	1	210	230	3.19e-49	159	403
NV2g012993000.1	NV2t012993001.1	XP_020896890.1	37.528	167	445	263	7	15	235	52.81	10	446	463	94	94	35	472	499	1.29e-95	297	760
NV2g013045000.1	NV2t013045001.1	XP_020907062.1	41.121	44	107	38	4	25	53	49.53	374	477	477	22	22	42	126	126	3.57e-08	52	123
NV2g013049000.1	NV2t013049001.1	XP_020907063.1	32.841	267	813	358	35	188	367	45.14	6	683	683	99	99	1	760	760	6.69e-84	280	717
NV2g013058000.1	NV2t013058002.1	XP_020901452.1	73.263	485	662	174	3	3	553	83.53	145	805	805	82	82	22	681	681	0	1026	2653
NV2g013059000.1	NV2t013059001.1	XP_020901412.1	50.448	169	335	142	7	24	234	69.85	1045	1361	1361	23	23	1017	1345	1346	2e-87	312	799
NV2g013095000.1	NV2t013095001.1	XP_020895323.2	62.757	214	341	110	2	17	255	74.78	1	329	330	99	99	1	336	340	1.54e-154	436	1122
NV2g013194000.1	NV2t013194001.1	XP_028512693.1	46.939	322	686	314	8	50	437	63.7	1	646	646	100	100	1	676	677	0	645	1663
NV2g013225000.1	NV2t013225001.1	XP_020902587.1	48.59	224	461	230	4	7	303	65.73	891	1344	1379	33	33	20	480	498	9.73e-147	455	1171
NV2g013246000.1	NV2t013246001.1	XP_028517247.1	51.471	245	476	222	4	9	334	70.17	1	473	586	81	81	15	484	989	1.68e-163	492	1266
NV2g013261000.1	NV2t013261001.1	XP_020916980.1	40.23	105	261	103	11	53	140	53.64	191	425	544	43	43	164	397	401	4.75e-33	130	327
NV2g013300000.1	NV2t013300001.1	XP_020904696.1	28.679	76	265	177	6	12	131	49.43	3	264	300	87	87	32	287	317	7.57e-24	99	245
NV2g013304000.1	NV2t013304001.1	XP_020916372.1	47.839	166	347	168	3	13	232	66.86	20	366	371	94	94	6	339	342	1.81e-110	326	836
NV2g013345000.1	NV2t013345001.1	XP_020915063.2	43.083	218	506	269	9	19	324	64.03	1	494	496	99	99	1	499	501	5.16e-136	402	1033
NV2g013381000.1	NV2t013381001.1	XP_020897164.1	39.786	372	935	443	32	120	523	55.94	7	870	877	99	99	6	891	904	0	570	1469
NV2g013424000.1	NV2t013424001.1	XP_028515412.1	58.28	366	628	255	3	7	469	74.68	313	938	938	92	67	585	1207	1212	0	787	2032
NV2g013439000.1	NV2t013439001.1	XP_020917300.1	44.72	144	322	168	3	10	197	61.18	31	352	371	87	87	1	312	325	3.49e-93	281	720
NV2g013450000.1	NV2t013450001.1	XP_020897328.1	45.746	285	623	321	6	17	404	64.85	40	654	658	93	93	2	615	619	0	572	1474
NV2g013500000.1	NV2t013500001.1	XP_020905496.1	59.24	904	1526	600	7	22	1178	77.2	5	1520	1520	99	99	2	1515	1515	0	1942	5030
NV2g013532000.1	NV2t013532004.1	XP_020916934.1	67.126	390	581	186	4	5	480	82.62	6	582	618	93	93	2	581	619	0	814	2103
NV2g013584000.1	NV2t013584001.1	XP_028518388.1	45.158	471	1043	472	19	100	604	57.91	233	1206	1206	96	81	358	1369	1370	0	828	2140
NV2g013702000.1	NV2t013702001.1	XP_020907315.2	61.688	190	308	116	2	2	238	77.27	77	383	383	80	80	44	350	350	4.12e-144	412	1060
NV2g013735000.1	NV2t013735001.1	XP_020895594.1	30.859	158	512	289	18	65	242	47.27	39	499	800	58	58	31	528	618	1.03e-47	179	454
NV2g013798000.1	NV2t013798001.1	XP_020904343.2	48.675	147	302	146	6	9	185	61.26	25	326	328	92	92	27	319	322	2.51e-91	275	703
NV2g013801000.1	NV2t013801001.1	XP_020903909.1	32.143	63	196	108	5	25	96	48.98	1	190	219	87	87	41	217	235	6.75e-24	95.1	235
NV2g013802000.1	NV2t013802001.1	XP_020907177.1	46.642	382	819	400	21	37	503	61.42	22	829	866	94	93	2	794	844	0	700	1807
NV2g013804000.1	NV2t013804004.1	XP_020913699.1	86.325	404	468	64	0	0	442	94.44	1	468	480	98	98	1	468	478	0	860	2222
NV2g013830000.1	NV2t013830001.1	XP_020916808.1	37.143	117	315	134	11	64	176	55.87	2	273	282	96	96	232	525	532	8.29e-49	169	428
NV2g013897000.1	NV2t013897001.1	XP_020911810.1	53.877	271	503	215	6	17	360	71.57	54	545	553	89	89	47	543	550	0	549	1414
NV2g013928000.1	NV2t013928001.1	XP_020905491.1	59.683	376	630	203	9	51	446	70.79	14	611	618	97	97	39	649	657	0	679	1753
NV2g014011000.1	NV2t014011001.1	XP_020898445.1	50.836	152	299	118	8	29	195	65.22	148	441	665	58	44	215	489	741	1.58e-83	278	712
NV2g014011000.1	NV2t014011004.1	XP_028514336.1	50.836	152	299	118	8	29	195	65.22	192	485	709	60	41	255	529	725	1.06e-82	277	708
NV2g014012000.1	NV2t014012001.1	XP_020898476.1	36.05	115	319	150	10	54	165	51.72	58	354	454	65	65	4	290	339	1.17e-45	161	408
NV2g014106000.1	NV2t014106001.1	XP_020905485.1	71.944	259	360	101	0	0	301	83.61	26	385	385	94	94	84	443	443	0	550	1417
NV2g014187000.1	NV2t014187002.1	XP_028519606.1	84.615	242	286	42	2	2	266	93.01	46	330	331	86	86	1	285	287	0	515	1327
NV2g014197000.1	NV2t014197002.1	XP_020916350.1	38.576	233	604	292	16	79	318	52.65	1	591	593	99	99	1	538	540	5.08e-114	350	898
NV2g014230000.1	NV2t014230001.1	XP_020899185.1	60.149	486	808	286	5	36	633	78.34	1	805	805	100	100	2	776	776	0	1060	2740
NV2g014235000.1	NV2t014235001.1	XP_020914563.1	45.525	234	514	268	7	12	345	67.12	22	527	527	96	96	23	532	532	4.21e-159	463	1192
NV2g014236000.1	NV2t014236001.1	XP_020914549.1	57.463	308	536	222	4	6	386	72.01	1	531	531	100	100	1	535	535	0	614	1584
NV2g014320000.1	NV2t014320001.1	XP_020900489.2	53.614	89	166	71	3	6	114	68.67	10	170	479	34	34	1	165	1116	3.64e-57	204	520
NV2g014373000.1	NV2t014373001.1	XP_020909071.1	46.361	172	371	188	8	11	244	65.77	1	364	373	98	98	1	367	370	3.33e-118	347	890
NV2g014428000.1	NV2t014428001.1	XP_020902926.1	51.261	305	595	238	8	52	386	64.87	14	572	574	97	97	20	598	660	0	610	1573
NV2g014440000.1	NV2t014440001.1	XP_020914195.1	71.45	473	662	180	4	9	551	83.23	6	664	664	99	99	7	662	662	0	939	2427
NV2g014445000.1	NV2t014445001.1	XP_020900384.1	44.371	67	151	84	0	0	101	66.89	3	153	215	70	70	4	154	192	1.19e-36	127	318
NV2g014459000.1	NV2t014459002.1	XP_020913639.1	68.404	210	307	89	6	8	243	79.15	16	315	315	95	95	1	306	306	5.86e-138	392	1008
NV2g014511000.1	NV2t014511001.1	XP_020916773.2	44.767	154	344	168	6	22	221	64.24	63	388	407	80	80	73	412	460	1.24e-98	301	772
NV2g014549000.1	NV2t014549003.1	XP_020900447.1	70.152	369	526	151	4	6	431	81.94	8	530	530	99	99	2	524	524	0	763	1969
NV2g014591000.1	NV2t014591001.1	XP_020899158.1	66.369	594	895	260	10	41	701	78.32	10	882	887	98	98	6	881	883	0	1190	3078
NV2g014626000.1	NV2t014626001.1	XP_028515116.1	65.891	170	258	78	5	10	201	77.91	516	768	768	33	33	1068	1320	1322	1.28e-97	330	845
NV2g014631000.1	NV2t014631001.1	XP_020908179.1	24.354	66	271	140	8	65	117	43.17	21	290	296	91	91	18	224	229	4.22e-11	61.6	148
NV2g014847000.1	NV2t014847001.1	XP_028513463.1	26.49	80	302	194	8	28	137	45.36	246	525	532	53	53	259	554	559	2.64e-22	100	249
NV2g014941000.1	NV2t014941003.1	XP_020897561.1	61.89	203	328	101	5	24	236	71.95	1	314	314	100	100	1	318	318	2.67e-135	386	991
NV2g015027000.1	NV2t015027001.1	XP_020897578.1	68.966	140	203	49	3	14	165	81.28	1	190	204	93	93	1	202	214	5.53e-97	280	717
NV2g015213000.1	NV2t015213001.1	XP_020894058.1	58.367	286	490	163	16	41	345	70.41	1	473	475	99	99	1	466	471	5.28e-179	509	1312
NV2g015241000.1	NV2t015241001.1	XP_020897502.1	57.286	228	398	144	9	26	288	72.36	90	481	491	80	80	1	378	383	3.76e-155	446	1147
NV2g015251000.1	NV2t015251003.1	XP_020892763.1	51.429	162	315	143	5	10	228	72.38	1	311	336	93	93	1	309	317	5.75e-108	318	814
NV2g015267000.1	NV2t015267001.1	XP_020901546.1	24.116	150	622	435	8	37	282	45.34	1	612	614	99	99	1	595	595	1.78e-63	219	559
NV2g015283000.1	NV2t015283001.1	XP_020898894.1	59.473	361	607	220	8	26	444	73.15	374	974	1061	57	57	389	975	1268	0	694	1791
NV2g015444000.1	NV2t015444001.1	XP_028517464.1	44.479	282	634	346	3	6	404	63.72	9	637	637	99	99	16	648	648	0	585	1507
NV2g015546000.1	NV2t015546001.1	XP_020909183.1	41.879	410	979	514	17	55	613	62.61	9	961	977	98	98	52	1001	1064	0	780	2015
NV2g015638000.1	NV2t015638001.1	XP_020914903.1	61.626	432	701	212	5	57	495	70.61	9	703	704	99	99	15	664	666	0	863	2229
NV2g015639000.1	NV2t015639001.1	XP_020914690.1	57.969	371	640	206	8	63	447	69.84	6	595	687	86	86	7	633	690	0	739	1907
NV2g015738000.1	NV2t015738001.1	XP_020893622.1	62.353	53	85	28	2	4	63	74.12	23	104	148	55	55	7	90	100	2.5e-28	100	249
NV2g015739000.1	NV2t015739001.1	XP_020893597.2	46.097	124	269	116	11	29	171	63.57	14	263	265	94	94	1	259	271	1.14e-57	185	469
NV2g015808000.1	NV2t015808001.1	XP_020909147.1	64.84	142	219	77	0	0	181	82.65	37	255	1629	77	13	24	242	1365	3.99e-101	356	913
NV2g015810000.1	NV2t015810001.1	XP_028517746.1	63.208	201	318	111	1	6	241	75.79	1	312	312	100	100	1	318	319	6.89e-143	405	1041
NV2g015872000.1	NV2t015872001.1	XP_028513260.1	50.279	180	358	176	1	2	243	67.88	40	395	1090	33	33	34	391	438	7.22e-130	402	1033
NV2g015874000.1	NV2t015874001.1	XP_020894629.1	66.042	317	480	154	4	9	394	82.08	21	499	501	96	96	7	478	483	0	624	1610
NV2g015883000.1	NV2t015883001.1	XP_020893796.1	43.687	218	499	236	8	45	307	61.52	196	663	678	69	69	260	744	756	1.9e-140	428	1101
NV2g015888000.1	NV2t015888001.1	XP_020917141.1	54.314	277	510	217	7	16	342	67.06	1	502	503	99	99	1	502	503	4.84e-169	486	1252
NV2g015888000.1	NV2t015888002.1	XP_020917140.1	55.916	293	524	216	6	15	356	67.94	1	516	516	100	100	1	517	517	0	523	1346
NV2g015933000.1	NV2t015933001.1	XP_028518467.1	53.367	420	787	342	9	25	529	67.22	1189	1954	2030	38	38	1235	2017	2689	0	897	2319
NV2g016007000.1	NV2t016007001.1	XP_028518964.1	62.162	253	407	152	2	2	305	74.94	57	462	614	82	66	42	447	540	0	547	1410
NV2g016008000.1	NV2t016008001.1	XP_020914906.1	64.398	246	382	129	4	7	304	79.58	518	899	910	42	42	1	375	380	8.38e-176	513	1322
NV2g016021000.1	NV2t016021001.1	XP_020905515.1	74.211	423	570	146	1	1	491	86.14	1	569	569	100	100	53	622	622	0	890	2300
NV2g016033000.1	NV2t016033001.1	XP_020914880.1	50.711	107	211	103	1	1	142	67.3	26	235	301	70	70	23	233	268	7.34e-66	207	527
NV2g016318000.1	NV2t016318001.1	XP_020916708.1	44.838	291	649	287	13	71	388	59.78	91	733	762	84	84	108	691	691	2.22e-173	514	1324
NV2g016329000.1	NV2t016329001.1	XP_020894645.1	43.083	109	253	92	11	52	140	55.34	261	482	490	45	45	183	414	415	2.2e-44	161	407
NV2g016334000.1	NV2t016334001.1	XP_028517323.1	61.934	301	486	171	5	14	355	73.05	20	503	503	96	96	291	764	764	0	569	1466
NV2g016360000.1	NV2t016360001.1	XP_020914877.1	50.223	225	448	187	11	36	289	64.51	360	793	793	83	55	413	838	838	5.84e-131	410	1054
NV2g016383000.1	NV2t016383001.1	XP_020905883.1	42.593	92	216	108	7	16	131	60.65	36	240	245	84	84	44	254	265	2.15e-39	137	345
NV2g016479000.1	NV2t016479001.1	XP_028513285.1	45.753	307	671	297	9	67	404	60.21	721	1342	2037	64	31	2	654	1365	7.41e-177	577	1486
NV2g016529000.1	NV2t016529001.1	XP_028514097.1	42.029	87	207	113	5	7	125	60.39	4	208	215	95	95	12	213	215	2.46e-50	162	411
NV2g016606000.1	NV2t016606001.1	XP_020894538.1	75.481	157	208	45	1	6	175	84.13	8	209	209	97	97	5	212	212	6.12e-113	321	822
NV2g016632000.1	NV2t016632001.1	XP_020899744.1	55.094	292	530	167	5	71	372	70.19	11	538	539	98	98	17	477	478	0	622	1604
NV2g016646000.1	NV2t016646001.1	XP_020917085.1	43.662	31	71	33	3	7	42	59.15	3	69	101	66	66	59	126	407	1.11e-08	50.8	120
NV2g016692000.1	NV2t016692002.1	XP_028518957.1	44.597	293	657	345	8	19	419	63.77	1	652	664	98	98	1	643	652	0	588	1517
NV2g016703000.1	NV2t016703001.1	XP_020917122.1	70.326	237	337	100	0	0	287	85.16	1	337	344	98	98	1	337	565	2.74e-178	506	1302
NV2g016941000.1	NV2t016941001.1	XP_020893786.1	62.315	253	406	138	7	15	294	72.41	1	404	974	41	41	1	393	922	4.53e-134	426	1095
NV2g016972000.1	NV2t016972002.1	XP_020913266.1	63.466	304	479	170	3	5	380	79.33	18	491	491	97	97	7	485	485	0	655	1689
NV2g017002000.1	NV2t017002001.1	XP_020914910.1	53.69	211	393	146	9	36	266	67.68	729	1102	1152	90	32	1026	1401	1713	5.89e-124	419	1076
NV2g017003000.1	NV2t017003001.1	XP_020914913.1	46.537	168	361	162	8	31	238	65.93	5	347	348	99	99	4	351	352	2.85e-91	276	707
NV2g017080000.1	NV2t017080002.1	XP_020893606.1	52.941	126	238	104	4	8	174	73.11	8	240	255	91	91	11	245	246	3.42e-87	259	661
NV2g017080000.1	NV2t017080003.1	XP_020905095.1	50.904	338	664	293	11	33	444	66.87	7	648	667	96	96	8	660	694	0	653	1685
NV2g017120000.1	NV2t017120001.1	XP_020900991.2	44.355	220	496	232	17	44	308	62.1	9	492	495	98	98	90	553	557	8.65e-124	372	956
NV2g017121000.1	NV2t017121001.1	XP_020899738.1	64.012	217	339	121	1	1	269	79.35	32	369	370	91	91	25	363	365	2.47e-172	484	1246
NV2g017169000.1	NV2t017169001.1	XP_020893811.1	53.67	585	1090	415	21	90	729	66.88	5	1067	1067	99	99	4	1030	1030	0	1085	2807
NV2g017239000.1	NV2t017239001.1	XP_028513553.1	39.035	89	228	105	4	34	122	53.51	932	1156	1349	27	17	1201	1397	1431	1.3e-48	190	482
NV2g017391000.1	NV2t017391001.1	XP_020907474.1	38.012	65	171	73	5	33	93	54.39	19	188	193	88	88	20	158	162	8.66e-30	107	268
NV2g017394000.1	NV2t017394001.1	XP_020907470.1	30.897	93	301	151	10	57	127	42.19	3	259	291	88	88	7	294	308	2.62e-21	91.7	226
NV2g017396000.1	NV2t017396001.1	XP_020904325.1	62.583	189	302	112	1	1	236	78.15	406	707	709	43	43	1	301	302	3.79e-143	420	1080
NV2g017402000.1	NV2t017402001.1	XP_020904333.1	37.634	105	279	131	7	43	149	53.41	197	461	461	57	57	288	537	537	9.76e-31	124	312
NV2g017408000.1	NV2t017408002.1	XP_020904316.1	53.211	58	109	46	2	5	70	64.22	59	162	166	63	63	152	260	264	5.2e-28	104	260
NV2g017517000.1	NV2t017517001.1	XP_020899893.1	39.865	295	740	351	21	94	420	56.76	7	715	729	97	97	2	678	682	3.42e-163	486	1252
NV2g017614000.1	NV2t017614003.1	XP_028518590.1	49.231	160	325	154	4	11	227	69.85	10	332	336	96	96	14	329	337	2.72e-112	329	844
NV2g017615000.1	NV2t017615001.1	XP_028518581.1	38.776	76	196	89	7	31	102	52.04	1	186	692	27	27	1	175	942	5.37e-22	101	252
NV2g017626000.1	NV2t017626001.1	XP_020897067.1	25.26	73	289	191	5	25	118	40.83	1	283	470	60	60	1	270	647	3.91e-22	99.8	247
NV2g017669000.1	NV2t017669001.1	XP_020913652.1	51.843	450	868	396	3	22	615	70.85	31	877	877	97	97	28	894	894	0	869	2245
NV2g017723000.1	NV2t017723001.1	XP_020906974.1	73.72	216	293	77	0	0	249	84.98	7	299	299	98	98	2	294	294	2.01e-163	456	1172
NV2g017806000.1	NV2t017806001.1	XP_020892185.1	76.735	376	490	109	2	5	420	85.71	4	490	502	97	97	21	508	508	0	763	1970
NV2g017807000.1	NV2t017807004.1	XP_020892225.1	66.351	280	422	141	1	1	342	81.04	50	470	470	90	90	1	422	422	0	588	1516
NV2g017826000.1	NV2t017826001.1	XP_028515353.1	45.755	291	636	272	16	73	386	60.69	255	860	886	80	68	640	1232	1237	4.59e-152	479	1233
NV2g017827000.1	NV2t017827003.1	XP_020902145.1	47.312	132	279	123	10	24	175	62.72	584	846	850	46	31	426	696	700	2.27e-71	248	634
NV2g017877000.1	NV2t017877001.1	XP_020898228.1	74.608	238	319	62	7	19	259	81.19	1	310	310	100	100	1	309	309	2.83e-166	464	1194
NV2g017887000.1	NV2t017887001.1	XP_020900263.2	66.886	305	456	148	1	3	360	78.95	26	481	488	93	93	2	454	458	0	642	1656
NV2g018023000.1	NV2t018023001.1	XP_028514648.1	71.562	843	1178	331	3	4	994	84.38	25	1201	1208	97	97	20	1194	1203	0	1755	4546
NV2g018052000.1	NV2t018052001.1	XP_020906966.1	73.214	410	560	149	1	1	468	83.57	5	563	1124	50	50	13	572	1108	0	888	2294
NV2g018067000.1	NV2t018067001.1	XP_028513306.1	58.2	472	811	312	8	27	570	70.28	4	798	895	89	89	21	820	823	0	904	2335
NV2g018077000.1	NV2t018077001.1	XP_020908967.2	43.032	281	653	284	13	88	381	58.35	67	645	666	87	87	48	686	777	7.21e-171	507	1306
NV2g018119000.1	NV2t018119001.1	XP_020899296.1	58.929	198	336	133	4	5	262	77.98	3	336	336	99	99	1	333	333	1.41e-146	416	1070
NV2g018171000.1	NV2t018171001.1	XP_020898123.1	30.162	130	431	262	14	39	204	47.33	36	453	454	92	92	36	440	441	1.39e-54	188	477
NV2g018174000.1	NV2t018174001.1	XP_020910859.1	52.326	45	86	35	1	6	58	67.44	222	307	405	21	21	1034	1113	1246	1.5e-22	100	249
NV2g018176000.1	NV2t018176001.1	XP_028517837.1	58.824	60	102	41	1	1	73	71.57	123	224	523	20	20	168	268	474	1.06e-30	124	312
NV2g018299000.1	NV2t018299001.1	XP_020899314.2	61.118	514	841	265	11	62	618	73.48	20	850	850	98	98	432	1220	1222	0	982	2538
NV2g018306000.1	NV2t018306001.1	XP_028515348.1	58.099	165	284	108	5	11	206	72.54	9	287	287	97	97	13	290	290	1.29e-116	337	863
NV2g018344000.1	NV2t018344001.1	XP_028512579.1	44.561	127	285	121	6	37	167	58.6	5	268	497	84	53	4	272	603	1.2e-73	244	622
NV2g018394000.1	NV2t018394005.1	XP_020897089.1	46.903	159	339	139	5	41	216	63.72	7	343	343	98	98	13	312	312	7.58e-107	315	806
NV2g018430000.1	NV2t018430001.1	XP_020906964.1	71.795	308	429	116	3	5	361	84.15	23	451	451	95	95	39	462	462	0	656	1693
NV2g018480000.1	NV2t018480001.1	XP_020899281.1	52.297	535	1023	386	8	102	705	68.91	11	1025	1025	99	99	6	934	934	0	1065	2753
NV2g018482000.1	NV2t018482001.1	XP_020905032.1	67.755	166	245	61	8	18	197	80.41	1	234	234	100	100	1	238	238	6.83e-110	315	808
NV2g018488000.1	NV2t018488001.1	XP_028514244.1	47.195	143	303	137	4	23	184	60.73	330	624	627	47	47	22	309	311	2.23e-89	280	715
NV2g018535000.1	NV2t018535001.1	XP_028518754.1	58	203	350	115	6	32	237	67.71	1	325	330	98	98	1	343	344	2.43e-129	372	956
NV2g018560000.1	NV2t018560001.1	XP_020903810.1	39.55	299	756	445	8	12	452	59.79	1	750	750	100	100	1	750	750	0	581	1498
NV2g018584000.1	NV2t018584001.1	XP_028518757.1	63.522	101	159	56	1	2	129	81.13	27	183	554	41	28	25	183	663	1.02e-71	242	617
NV2g018585000.1	NV2t018585001.1	XP_028518745.1	65.193	236	362	120	3	6	285	78.73	240	599	687	52	52	80	437	549	0	530	1365
NV2g018597000.1	NV2t018597001.1	XP_020903826.1	41.667	315	756	427	7	14	447	59.13	1	748	748	100	100	1	750	750	0	600	1547
NV2g018609000.1	NV2t018609001.1	XP_020893658.1	71.987	221	307	85	1	1	247	80.46	1	306	308	99	99	172	478	480	3.87e-148	424	1091
NV2g018639000.1	NV2t018639001.1	XP_020914949.1	65.143	228	350	118	2	4	287	82	6	351	355	97	97	1	350	353	5.03e-174	487	1254
NV2g018751000.1	NV2t018751003.1	XP_020898218.1	49.589	422	851	313	24	116	512	60.16	161	976	976	84	84	321	1090	1090	0	702	1812
NV2g018752000.1	NV2t018752001.1	XP_020899739.1	33.379	484	1450	835	38	131	749	51.66	1	1387	1402	99	99	50	1431	1456	0	744	1921
NV2g018783000.1	NV2t018783003.1	XP_020913843.1	73.171	420	574	107	5	47	466	81.18	4	568	573	99	99	32	567	567	0	833	2153
NV2g018784000.1	NV2t018784001.1	XP_020901288.1	37.11	262	706	394	18	50	390	55.24	19	683	822	81	81	13	709	832	4.22e-135	422	1084
NV2g018831000.1	NV2t018831001.1	XP_020914939.2	44.481	137	308	137	7	34	187	60.71	18	317	323	93	93	376	657	661	1.17e-65	218	555
NV2g018846000.1	NV2t018846001.1	XP_020913660.1	61.31	206	336	110	5	20	255	75.89	1	328	333	98	98	1	324	332	1.39e-152	431	1109
NV2g018856000.1	NV2t018856001.1	XP_020904982.1	83.657	517	618	91	8	10	555	89.81	1	614	614	100	100	1	612	612	0	1056	2732
NV2g018912000.1	NV2t018912001.1	XP_020899888.1	64.557	51	79	27	1	1	62	78.48	4	81	154	53	51	94	172	174	2.64e-29	105	262
NV2g018954000.1	NV2t018954001.1	XP_020908982.1	44.037	96	218	70	6	52	109	50	59	238	238	76	76	161	364	364	1.16e-37	135	339
NV2g019110000.1	NV2t019110003.1	XP_020896622.1	35.294	120	340	201	9	19	180	52.94	3	333	351	94	94	25	354	367	5.91e-58	191	486
NV2g019339000.1	NV2t019339001.1	XP_020896819.1	60.241	100	166	57	5	9	119	71.69	1	163	176	93	93	1	160	169	5.51e-52	164	414
NV2g019340000.1	NV2t019340013.1	XP_020896821.1	64.815	105	162	55	1	2	127	78.4	34	195	195	83	83	1	160	160	1.1e-72	216	551
NV2g019366000.1	NV2t019366001.1	XP_020913210.2	41.928	187	446	230	6	29	257	57.62	12	456	467	95	95	7	424	427	2.64e-113	340	872
NV2g019432000.1	NV2t019432001.1	XP_020892586.1	42.478	144	339	193	2	2	215	63.42	83	420	430	79	79	100	437	440	1.84e-101	309	791
NV2g019508000.1	NV2t019508001.1	XP_028513866.1	54.08	285	527	238	3	4	389	73.81	30	554	557	94	94	49	573	594	0	586	1510
NV2g019556000.1	NV2t019556001.1	XP_020916504.1	43.556	196	450	243	3	11	283	62.89	100	538	563	78	78	66	515	531	3.15e-133	398	1023
NV2g019727000.1	NV2t019727001.1	XP_028518508.1	49.466	139	281	131	5	11	186	66.19	20	292	293	93	93	406	683	686	4.73e-85	268	686
NV2g019745000.1	NV2t019745001.1	XP_028516251.1	66.279	114	172	53	2	5	139	80.81	86	252	486	34	34	347	518	518	3.86e-63	213	543
NV2g019753000.1	NV2t019753001.1	XP_028512986.1	47.5	76	160	82	2	2	111	69.38	4	162	162	98	98	6	164	164	1.33e-50	159	403
NV2g019758000.1	NV2t019758001.1	XP_020909294.1	65.441	178	272	93	1	1	225	82.72	1	271	271	100	100	1	272	272	2e-138	390	1003
NV2g019762000.1	NV2t019762001.1	XP_020909317.1	44.634	183	410	217	4	10	266	64.88	50	454	465	87	87	24	428	430	2.7e-129	381	978
NV2g019770000.1	NV2t019770001.1	XP_020896956.1	67.606	96	142	41	2	5	118	83.1	84	220	221	62	62	56	197	199	1.61e-68	208	530
NV2g020036000.1	NV2t020036001.1	XP_020909233.1	57.282	295	515	215	2	5	385	74.76	13	527	528	98	98	29	538	541	0	619	1597
NV2g020119000.1	NV2t020119001.1	XP_020910299.1	75	771	1028	250	4	7	882	85.8	1	1022	1022	100	100	1	1027	1027	0	1608	4164
NV2g020240000.1	NV2t020240001.1	XP_020894335.1	73.598	315	428	113	0	0	364	85.05	53	480	480	89	89	53	480	480	0	689	1778
NV2g020267000.1	NV2t020267001.1	XP_020896837.1	45.66	363	795	408	9	24	515	64.78	3	788	952	93	83	13	792	880	0	709	1830
NV2g020270000.1	NV2t020270001.1	XP_020896827.1	44.687	164	367	177	7	26	236	64.31	1	350	353	99	99	1	358	384	1.46e-99	299	766
NV2g020276000.1	NV2t020276001.1	XP_020894962.1	50	100	200	98	1	2	132	66	10	207	207	96	96	15	214	214	2.62e-61	190	482
NV2g020419000.1	NV2t020419001.1	XP_028517366.1	57.432	85	148	62	1	1	111	75	1	147	183	80	80	272	419	425	6.93e-52	171	433
NV2g020429000.1	NV2t020429001.1	XP_020898817.1	57.836	155	268	113	0	0	201	75	14	281	283	95	95	22	289	304	1.51e-109	319	817
NV2g020520000.1	NV2t020520002.1	XP_020909343.1	53.125	272	512	219	9	21	349	68.16	19	521	523	96	96	16	515	517	0	542	1397
NV2g020636000.1	NV2t020636001.1	XP_020907686.1	57.411	275	479	199	3	5	351	73.28	5	482	482	99	99	3	477	477	0	578	1491
NV2g020737000.1	NV2t020737002.1	XP_020901933.1	60.643	302	498	185	6	11	385	77.31	3	492	492	99	99	5	499	499	0	649	1673
NV2g020815000.1	NV2t020815001.1	XP_020901814.1	55.892	166	297	121	5	10	212	71.38	6	300	305	97	97	6	294	294	5.1e-112	326	835
NV2g020819000.1	NV2t020819001.1	XP_028516859.1	36.979	541	1463	840	27	82	812	55.5	174	1622	1633	99	89	439	1833	1857	0	887	2292
NV2g020838000.1	NV2t020838001.1	XP_020916765.1	56.954	86	151	63	2	2	115	76.16	9	158	169	89	89	1	150	158	2.96e-62	189	480
NV2g020849000.1	NV2t020849001.1	XP_020901830.1	44.922	115	256	117	9	24	155	60.55	1	240	240	100	100	1	248	248	7.14e-57	181	459
NV2g020884000.1	NV2t020884001.1	XP_020909347.1	63.889	138	216	71	7	7	162	75	34	242	252	83	83	46	261	267	4.53e-86	257	656
NV2g020952000.1	NV2t020952001.1	XP_020902676.1	63.569	171	269	95	3	3	209	77.7	19	287	290	93	93	16	281	284	2.25e-124	356	914
NV2g021053000.1	NV2t021053001.1	XP_020915266.1	62.7	274	437	149	6	14	337	77.12	14	442	442	97	97	29	459	459	0	546	1406
NV2g021109000.1	NV2t021109001.1	XP_020915238.1	52.212	118	226	104	2	4	150	66.37	1	226	228	99	99	1	222	224	5.86e-82	244	622
NV2g021183000.1	NV2t021183001.1	XP_020908016.1	50.847	150	295	114	8	31	184	62.37	13	302	308	94	94	11	279	282	9.04e-83	251	641
NV2g021271000.1	NV2t021271001.1	XP_020902644.1	48.524	263	542	264	6	15	358	66.05	9	547	566	95	95	6	535	540	0	536	1382
NV2g021271000.1	NV2t021271002.1	XP_020902640.1	45.048	282	626	296	10	48	385	61.5	9	600	619	96	96	6	617	622	0	534	1375
NV2g021273000.1	NV2t021273001.1	XP_028515505.1	37.269	101	271	158	5	12	154	56.83	32	298	736	36	36	4	266	649	1.38e-54	199	505
NV2g021330000.1	NV2t021330002.1	XP_020908027.1	47.232	128	271	142	1	1	189	69.74	16	285	293	92	92	1	271	281	2.37e-94	280	716
NV2g021461000.1	NV2t021461003.1	XP_020903682.1	68.585	286	417	113	10	18	346	82.97	1	412	412	100	100	3	406	406	0	555	1431
NV2g021577000.1	NV2t021577002.1	XP_028515504.1	38.647	320	828	434	18	74	479	57.85	1743	2558	2890	55	28	291	1056	1076	6.12e-168	550	1417
NV2g021582000.1	NV2t021582001.1	XP_020908056.1	69.11	132	191	54	2	5	160	83.77	14	202	202	94	94	13	200	200	4.31e-93	270	690
NV2g021600000.1	NV2t021600001.1	XP_020908807.1	71.654	91	127	34	1	2	106	83.46	1	127	127	100	100	1	125	125	1.41e-63	189	481
NV2g021976000.1	NV2t021976003.1	XP_028515599.1	68.775	174	253	77	1	2	210	83	1	253	254	99	99	57	307	308	1.62e-133	379	972
NV2g022004000.1	NV2t022004001.1	XP_020902572.1	32.641	110	337	219	6	8	172	51.04	23	354	410	81	81	21	354	580	7.23e-53	185	470
NV2g022126000.1	NV2t022126001.1	XP_020902598.1	73.282	384	524	129	3	11	455	86.83	1	513	513	100	100	1	524	524	0	813	2100
NV2g022155000.1	NV2t022155002.1	XP_020907979.1	57.633	1091	1893	706	24	96	1367	72.21	178	2046	2064	91	91	252	2072	2090	0	2244	5814
NV2g022228000.1	NV2t022228001.1	XP_020902383.1	76.571	402	525	118	4	5	445	84.76	1	524	524	100	100	1	521	521	0	827	2136
NV2g022278000.1	NV2t022278001.1	XP_028515471.1	44.414	163	367	164	5	40	224	61.04	2	330	339	97	97	375	739	761	2.02e-97	304	779
NV2g022291000.1	NV2t022291001.1	XP_020908660.2	61.715	698	1131	413	12	20	847	74.89	1	1119	1120	99	99	1	1123	1124	0	1432	3706
NV2g022451000.1	NV2t022451001.1	XP_028516091.1	47.826	165	345	138	8	42	218	63.19	5	348	348	99	99	16	319	319	1.66e-98	294	752
NV2g022452000.1	NV2t022452001.1	XP_020904947.1	44.353	161	363	188	5	14	226	62.26	6	363	381	94	94	1	354	358	6.26e-108	321	822
NV2g022454000.1	NV2t022454001.1	XP_020904948.1	68.558	290	423	119	7	14	332	78.49	1	415	415	100	100	1	417	417	0	577	1486
NV2g022490000.1	NV2t022490001.1	XP_020907663.1	71.937	182	253	71	0	0	212	83.79	20	272	273	93	93	3	255	256	4.93e-134	379	972
NV2g022507000.1	NV2t022507001.1	XP_020895246.1	70.721	157	222	63	1	2	192	86.49	1	220	232	95	95	1	222	420	5.16e-118	342	878
NV2g022721000.1	NV2t022721001.1	XP_020895219.1	74.607	332	445	88	11	25	365	82.02	4	435	435	99	99	1	433	433	0	633	1633
NV2g022740000.1	NV2t022740002.1	XP_020908360.1	49.807	129	259	122	4	8	173	66.8	71	324	333	76	76	2	257	276	7.81e-86	259	663
NV2g022756000.1	NV2t022756001.1	XP_020908003.1	55.853	396	709	285	7	28	501	70.66	10	713	728	97	97	9	694	695	0	818	2114
NV2g022835000.1	NV2t022835001.1	XP_020916128.1	54.795	40	73	29	1	4	55	75.34	105	177	177	41	41	77	145	146	1.72e-23	90.5	223
NV2g022943000.1	NV2t022943002.1	XP_020916084.1	83.284	563	676	109	2	4	621	91.86	1	673	694	97	97	1	675	701	0	1145	2961
NV2g023081000.1	NV2t023081001.1	XP_028514256.1	31.421	126	401	241	12	34	200	49.88	83	468	494	78	78	28	409	444	6.46e-48	171	433
NV2g023095000.1	NV2t023095001.1	XP_020916006.1	67.308	140	208	65	2	3	163	78.37	1	206	209	99	99	7	213	213	5.49e-99	286	731
NV2g023122000.1	NV2t023122003.1	XP_020903146.1	53.097	60	113	52	1	1	85	75.22	1	112	115	97	97	1	113	113	1.24e-40	130	327
NV2g023131000.1	NV2t023131001.1	XP_020904914.1	49.565	114	230	98	6	18	141	61.3	31	257	257	88	88	4	218	218	8.71e-66	204	518
NV2g023185000.1	NV2t023185002.1	XP_020916166.1	65.319	307	470	140	4	23	365	77.66	1	464	479	97	97	1	453	464	0	639	1647
NV2g023247000.1	NV2t023247002.1	XP_020916875.1	78.889	284	360	70	4	6	321	89.17	1	358	365	98	98	1	356	360	0	596	1536
NV2g023248000.1	NV2t023248001.1	XP_020916883.1	71.429	255	357	93	5	9	292	81.79	66	421	438	81	81	61	409	423	1.32e-174	495	1274
NV2g023451000.1	NV2t023451001.1	XP_020914367.1	76.393	576	754	177	1	1	674	89.39	2	754	754	99	99	4	757	757	0	1249	3232
NV2g023584000.1	NV2t023584001.1	XP_020894492.1	27.914	91	326	176	12	59	159	48.77	63	368	369	83	83	48	334	337	6.63e-30	117	293
NV2g023613000.1	NV2t023613001.1	XP_020914316.1	68.772	599	871	226	12	46	664	76.23	7	872	875	99	99	7	836	838	0	1140	2950
NV2g023619000.1	NV2t023619001.1	XP_020904793.1	67.669	180	266	86	0	0	211	79.32	1	266	268	99	99	1	266	268	5.05e-135	382	980
NV2g023668000.1	NV2t023668001.1	XP_020904788.1	69.312	131	189	56	1	2	159	84.13	10	198	201	94	94	12	198	202	3.48e-96	278	710
NV2g023791000.1	NV2t023791001.1	XP_020910700.1	39.831	47	118	64	2	7	74	62.71	998	1112	1123	10	10	17	130	176	2.84e-24	100	250
NV2g023839000.1	NV2t023839001.1	XP_020916144.1	77.18	416	539	107	3	16	467	86.64	1	526	526	100	100	1	536	536	0	863	2229
NV2g023846000.1	NV2t023846001.1	XP_028519279.1	53.532	288	538	238	6	12	370	68.77	30	565	568	94	94	27	554	555	0	603	1556
NV2g023902000.1	NV2t023902001.1	XP_020897412.1	35.506	158	445	230	9	57	248	55.73	8	439	664	65	65	7	407	561	1.59e-95	305	781
NV2g023951000.1	NV2t023951001.1	XP_020908969.1	60.547	155	256	97	2	4	198	77.34	16	271	271	94	94	1	252	252	7.03e-114	327	839
NV2g024032000.1	NV2t024032002.1	XP_020916099.1	69.524	219	315	95	1	1	267	84.76	1	315	316	99	99	2	315	343	1.65e-166	466	1199
NV2g024161000.1	NV2t024161001.1	XP_020914459.1	69.604	316	454	128	3	10	361	79.52	1	454	457	99	99	1	444	449	0	607	1566
NV2g024302000.1	NV2t024302001.1	XP_020904839.1	58.349	304	521	204	8	13	396	76.01	1	510	512	99	99	1	519	521	0	602	1553
NV2g024332000.1	NV2t024332001.1	XP_028518722.1	62.718	180	287	107	0	0	227	79.09	87	373	376	76	76	12	298	301	2.41e-141	403	1036
NV2g024334000.1	NV2t024334001.1	XP_028518697.1	46.429	130	280	116	5	34	170	60.71	118	391	789	35	35	597	848	997	4.11e-73	257	657
NV2g024348000.1	NV2t024348001.1	XP_028517049.1	51.573	295	572	260	7	17	381	66.61	1	562	1997	77	28	1	565	2721	1.03e-148	514	1323
NV2g024358000.1	NV2t024358003.1	XP_028512753.1	45.989	172	374	196	4	6	224	59.89	64	435	542	69	69	274	643	696	3.25e-95	304	779
NV2g024359000.1	NV2t024359002.1	XP_028512752.1	41.841	100	239	105	9	34	139	58.16	286	506	506	76	44	127	349	349	1.06e-48	171	433
NV2g024360000.1	NV2t024360001.1	XP_028512751.1	58.363	328	562	160	9	74	387	68.86	709	1211	1289	74	39	549	1095	1291	3.98e-174	551	1420
NV2g024361000.1	NV2t024361001.1	XP_020892717.1	41.699	108	259	151	0	0	165	63.71	10	268	274	95	95	1	259	265	3.6e-59	189	479
NV2g024363000.1	NV2t024363001.1	XP_020892704.2	35.417	102	288	138	1	48	156	54.17	740	1027	1039	28	28	1022	1261	1263	9.92e-37	150	380
NV2g024375000.1	NV2t024375002.1	XP_020906601.1	67.515	1114	1650	506	13	30	1269	76.91	1	1632	1632	100	100	1	1638	1638	0	1333	3451
NV2g024631000.1	NV2t024631001.1	XP_020906695.2	49.22	284	577	281	6	12	398	68.98	13	585	587	98	98	14	582	1198	0	596	1537
NV2g024666000.1	NV2t024666001.1	XP_028518696.1	66.436	192	289	94	1	3	240	83.04	35	320	323	89	89	3	291	292	1e-132	379	973
NV2g024780000.1	NV2t024780001.1	XP_020906382.1	74.359	145	195	44	3	6	166	85.13	1	190	190	100	100	1	194	194	2.91e-103	295	755
NV2g024811000.1	NV2t024811001.1	XP_020915558.2	61.111	198	324	120	3	6	238	73.46	7	330	330	98	98	20	337	443	4.93e-139	401	1030
NV2g024826000.1	NV2t024826002.1	XP_020905633.1	75.316	119	158	38	1	1	140	88.61	33	189	193	81	81	1	158	161	1.87e-87	254	648
NV2g024850000.1	NV2t024850003.1	XP_020915535.1	50.538	235	465	219	5	11	313	67.31	3	462	463	99	99	9	467	470	9.17e-166	475	1223
NV2g024893000.1	NV2t024893001.1	XP_028515957.1	34.332	126	367	182	15	59	177	48.23	4	332	334	99	99	2	347	482	1.78e-47	166	421
NV2g024951000.1	NV2t024951002.1	XP_028515968.1	55.072	152	276	104	5	20	192	69.57	203	466	552	70	48	105	372	571	2.93e-85	275	703
NV2g025130000.1	NV2t025130001.1	XP_020911073.1	50.485	312	618	266	17	40	406	65.7	4	591	591	99	99	18	625	625	0	569	1467
NV2g025184000.1	NV2t025184001.1	XP_020916248.1	69.354	869	1253	368	9	16	1022	81.56	32	1277	1519	82	82	23	1266	1288	0	1803	4669
NV2g025228000.1	NV2t025228001.1	XP_020906742.1	33.91	98	289	181	4	10	163	56.4	1	282	331	85	85	1	286	362	1.4e-56	187	475
NV2g025253000.1	NV2t025253001.1	XP_020896363.1	51.978	289	556	261	5	6	399	71.76	3	555	565	98	98	51	603	604	0	638	1646
NV2g025327000.1	NV2t025327001.1	XP_020896358.1	72.365	254	351	97	0	0	302	86.04	273	623	623	56	56	752	1102	1102	0	567	1462
NV2g025337000.1	NV2t025337001.1	XP_020904361.1	38.779	254	655	312	24	89	347	52.98	525	1140	1148	54	54	1369	1973	1986	2.13e-108	375	962
NV2g025410000.1	NV2t025410001.1	XP_028516020.1	45.368	191	421	183	13	47	267	63.42	1	406	406	100	100	1	389	389	4.5e-110	328	841
NV2g025428000.1	NV2t025428001.1	XP_020906618.1	61.814	293	474	163	4	18	366	77.22	1	466	467	99	99	19	482	483	0	601	1550
NV2g025537000.1	NV2t025537001.1	XP_020896288.1	63.934	234	366	119	6	13	276	75.41	22	376	376	94	94	26	389	389	8.27e-177	496	1278
NV2g025612000.1	NV2t025612001.1	XP_020917599.2	53.691	160	298	135	2	3	213	71.48	44	338	340	87	87	9	306	310	8.35e-116	337	865
NV2g025707000.1	NV2t025707001.1	XP_028516388.1	36.63	837	2285	1107	70	341	1315	57.55	679	2807	2850	98	75	363	2462	5232	0	1132	2928
NV2g025714000.1	NV2t025714001.1	XP_020906367.1	47.748	159	333	163	2	11	228	68.47	44	367	382	85	85	24	354	388	6.67e-99	299	765
NV2g025991000.1	NV2t025991001.1	XP_020917839.1	76.842	73	95	22	0	0	83	87.37	35	129	130	73	73	50	144	288	2.56e-52	166	421

## Sheet: Stylophora
gene_id	query_id	subject_id	perc_identity	num_ident_matches	alig_length	mismatches	gap_openings	n_gaps	pos_match	ppos	q_start	q_end	q_len	qcov	qcovhsp	s_start	s_end	s_len	evalue	bit_score	score_raw
NV2g000118000.1	NV2t000118001.1	XP_022779796.1	61.492	404	657	239	4	14	490	74.58	1	643	654	98	98	44	700	713	0	875	2260
NV2g000119000.1	NV2t000119001.1	XP_022779799.1	50.251	200	398	192	3	6	275	69.1	89	485	492	81	81	123	515	519	7.2e-147	430	1106
NV2g000131000.1	NV2t000131001.1	XP_022795206.1	49.194	122	248	126	0	0	175	70.56	12	259	260	95	95	17	264	264	4.03e-92	273	697
NV2g000273000.1	NV2t000273001.1	XP_022802305.1	63.265	217	343	123	2	3	268	78.13	1	341	410	83	83	1	342	344	2.08e-160	455	1170
NV2g000295000.1	NV2t000295001.1	XP_022786621.1	56.822	379	667	264	6	24	475	71.21	2	649	651	99	99	11	672	672	0	752	1942
NV2g000667000.1	NV2t000667001.1	XP_022787068.1	59.116	107	181	74	0	0	130	71.82	2	182	187	97	97	43	223	253	4.42e-79	236	602
NV2g000675000.1	NV2t000675002.1	XP_022796937.1	55.745	393	705	279	13	33	495	70.21	9	688	688	99	99	10	706	706	0	758	1958
NV2g000676000.1	NV2t000676001.1	XP_022796946.1	62.082	334	538	161	9	43	398	73.98	10	521	541	95	95	1	521	542	0	672	1733
NV2g000737000.1	NV2t000737001.1	XP_022801157.1	38.009	420	1105	638	26	47	624	56.47	84	1159	1264	85	85	145	1231	1774	0	722	1864
NV2g000738000.1	NV2t000738001.1	XP_022801159.1	39.502	222	562	279	11	61	337	59.96	604	1117	1131	45	45	1	549	576	1.05e-135	424	1089
NV2g000767000.1	NV2t000767001.1	XP_022805591.1	46.711	71	152	81	0	0	98	64.47	11	162	185	82	82	4	155	155	1.01e-50	160	406
NV2g000918000.1	NV2t000918002.1	XP_022800286.1	65.392	325	497	161	7	11	399	80.28	22	515	844	59	59	19	507	859	0	654	1687
NV2g000919000.1	NV2t000919004.1	XP_022802012.1	66.234	306	462	133	10	23	352	76.19	3	451	451	99	99	8	459	459	0	596	1536
NV2g000920000.1	NV2t000920002.1	XP_022802014.1	53.48	146	273	118	3	9	183	67.03	29	294	323	82	82	68	338	353	3.03e-99	296	758
NV2g000922000.1	NV2t000922001.1	XP_022802025.1	55.932	198	354	152	4	4	267	75.42	62	413	418	84	84	71	422	427	5.78e-146	422	1084
NV2g000930000.1	NV2t000930001.1	XP_022799753.1	50.142	352	702	329	6	21	482	68.66	23	708	710	97	97	4	700	703	0	729	1881
NV2g000931000.1	NV2t000931001.1	XP_022799755.1	49.55	275	555	249	7	31	377	67.93	53	596	596	91	91	54	588	588	0	565	1457
NV2g000932000.1	NV2t000932001.1	XP_022799772.1	60.547	155	256	99	2	2	204	79.69	134	387	446	57	57	5	260	335	1.68e-116	344	883
NV2g000949000.1	NV2t000949001.1	XP_022802502.1	79.796	470	589	116	3	3	520	88.29	1	587	589	99	99	114	701	705	0	954	2466
NV2g001044000.1	NV2t001044001.1	XP_022779072.1	32.273	71	220	143	3	6	119	54.09	5	224	230	96	96	2	215	215	8.92e-35	123	309
NV2g001122000.1	NV2t001122003.1	XP_022786600.1	44.605	339	760	383	8	38	463	60.92	25	760	827	89	89	21	766	930	0	646	1666
NV2g001169000.1	NV2t001169001.1	XP_022802311.1	78.812	398	505	97	2	10	455	90.1	346	847	847	59	59	358	855	855	0	756	1953
NV2g001170000.1	NV2t001170001.1	XP_022802321.1	59.654	207	347	134	3	6	255	73.49	11	355	449	77	77	16	358	367	4.21e-136	395	1016
NV2g001302000.1	NV2t001302001.1	XP_022791488.1	57.581	319	554	204	7	31	411	74.19	1	534	538	99	99	1	543	555	0	625	1612
NV2g001356000.1	NV2t001356001.1	XP_022792465.1	41.557	283	681	346	13	52	409	60.06	25	671	672	96	96	4	666	667	0	533	1372
NV2g001389000.1	NV2t001389001.1	XP_022805096.1	73.026	222	304	82	0	0	252	82.89	1	304	309	98	98	1	304	306	3.66e-162	454	1167
NV2g001420000.1	NV2t001420001.1	XP_022809820.1	35.021	83	237	125	10	29	123	51.9	70	301	304	76	76	2	214	215	8.33e-30	112	281
NV2g001477000.1	NV2t001477001.1	XP_022782179.1	63.492	160	252	87	3	5	209	82.94	3	252	351	71	71	2	250	252	5.6e-124	357	915
NV2g001762000.1	NV2t001762001.1	XP_022784605.1	37.135	127	342	199	6	16	192	56.14	14	353	395	86	86	6	333	369	2.9e-71	228	581
NV2g001823000.1	NV2t001823001.1	XP_022787585.1	58.65	139	237	97	1	1	174	73.42	29	265	307	77	77	13	248	293	1.31e-92	276	707
NV2g001824000.1	NV2t001824002.1	XP_022787630.1	59.532	178	299	113	4	8	216	72.24	3	296	429	69	69	2	297	315	1.5e-116	343	880
NV2g001824000.1	NV2t001824004.1	XP_022787584.1	69.204	200	289	87	1	2	245	84.78	1	289	290	99	99	1	287	298	3.03e-154	432	1112
NV2g001841000.1	NV2t001841001.1	XP_022783462.1	56.03	302	539	233	4	4	383	71.06	28	564	566	95	95	7	543	545	0	633	1632
NV2g001889000.1	NV2t001889001.1	XP_022788199.1	54.603	261	478	196	3	21	359	75.1	9	466	466	98	98	20	496	497	0	543	1399
NV2g001925000.1	NV2t001925001.1	XP_022798792.1	51	255	500	241	4	4	355	71	4	502	503	99	99	117	613	613	0	529	1363
NV2g002533000.1	NV2t002533001.1	XP_022798266.1	56.522	78	138	58	2	2	94	68.12	1	136	363	37	37	1	138	301	3.84e-48	165	417
NV2g002581000.1	NV2t002581001.1	XP_022787362.1	44.246	173	391	211	3	7	262	67.01	1	389	405	96	96	35	420	424	5.32e-123	363	931
NV2g002644000.1	NV2t002644001.1	XP_022795387.1	41.086	348	847	422	15	77	481	56.79	7	801	802	99	99	3	824	847	0	586	1511
NV2g002652000.1	NV2t002652001.1	XP_022801271.1	63.787	192	301	103	4	6	243	80.73	4	302	302	99	99	5	301	301	1.5e-130	373	958
NV2g002698000.1	NV2t002698002.1	XP_022780825.1	33.511	126	376	221	12	29	180	47.87	34	390	390	92	92	43	408	408	1.22e-54	186	471
NV2g002702000.1	NV2t002702001.1	XP_022803969.1	44.444	80	180	95	2	5	124	68.89	11	185	185	95	95	3	182	182	2.76e-56	176	445
NV2g002739000.1	NV2t002739003.1	XP_022786348.1	49.184	241	490	224	1	25	326	66.53	1	465	486	96	96	1	490	544	0	518	1335
NV2g002743000.1	NV2t002743001.1	XP_022794056.1	36.364	40	110	65	1	5	61	55.45	4	108	119	88	88	6	115	115	5.28e-21	81.3	199
NV2g002966000.1	NV2t002966004.1	XP_022781105.1	82.477	273	331	47	7	11	280	84.59	1	320	320	100	100	1	331	331	0	516	1330
NV2g003092000.1	NV2t003092001.1	XP_022787989.1	72.185	109	151	39	1	3	128	84.77	28	175	176	84	84	1	151	154	4.56e-85	247	630
NV2g003098000.1	NV2t003098001.1	XP_022787941.1	69.1	530	767	229	4	8	637	83.05	4	768	773	99	99	7	767	769	0	1113	2878
NV2g003099000.1	NV2t003099001.1	XP_022787985.1	58.042	83	143	55	2	5	101	70.63	1	143	143	100	100	1	138	139	6.08e-57	174	441
NV2g003135000.1	NV2t003135001.1	XP_022787912.1	68.613	282	411	123	3	6	338	82.24	43	451	495	83	83	5	411	587	0	576	1485
NV2g003261000.1	NV2t003261002.1	XP_022800707.1	50	50	100	50	0	0	69	69	33	132	132	76	76	22	121	121	1.23e-33	114	285
NV2g003330000.1	NV2t003330001.1	XP_022787992.1	48.168	263	546	224	8	59	355	65.02	94	630	648	83	83	101	596	596	1.02e-176	515	1327
NV2g003341000.1	NV2t003341001.1	XP_022804315.1	56.748	185	326	139	2	2	240	73.62	55	379	379	86	86	11	335	335	3.28e-128	372	954
NV2g003555000.1	NV2t003555001.1	XP_022808147.1	63.462	99	156	57	0	0	132	84.62	703	858	859	71	18	643	798	799	4.5e-69	244	624
NV2g003609000.1	NV2t003609002.1	XP_022781162.1	47.337	160	338	169	4	9	220	65.09	23	354	354	94	94	21	355	355	3.11e-113	333	854
NV2g003674000.1	NV2t003674002.1	XP_022795626.1	55.465	340	613	252	7	21	448	73.08	17	619	619	97	97	9	610	610	0	706	1822
NV2g003697000.1	NV2t003697002.1	XP_022781181.1	42.241	49	116	64	3	3	72	62.07	24	137	137	83	83	43	157	165	1.03e-23	90.5	223
NV2g003783000.1	NV2t003783002.1	XP_022801297.1	67.053	521	777	209	16	47	599	77.09	9	757	760	99	99	1	758	805	0	972	2514
NV2g003818000.1	NV2t003818001.1	XP_022801330.1	42.982	98	228	126	1	4	152	66.67	15	238	239	94	94	15	242	244	1.23e-69	214	544
NV2g003876000.1	NV2t003876001.1	XP_022791654.1	36.061	119	330	169	10	42	171	51.82	107	421	441	71	71	50	352	354	2.53e-52	179	455
NV2g003951000.1	NV2t003951001.1	XP_022803960.1	65.368	151	231	74	3	6	171	74.03	57	287	587	39	39	146	370	370	4.15e-104	319	817
NV2g004006000.1	NV2t004006001.1	XP_022802488.1	52.703	195	370	147	5	28	243	65.68	29	397	397	93	93	20	362	362	1.14e-119	352	902
NV2g004066000.1	NV2t004066001.1	XP_022791089.1	45.498	1339	2943	1519	47	85	1868	63.47	1242	4144	4146	70	70	121	3018	5085	0	2640	6844
NV2g004093000.1	NV2t004093001.1	XP_022804877.1	47.91	149	311	154	4	8	197	63.34	1	306	319	96	96	1	308	322	4.82e-92	277	708
NV2g004150000.1	NV2t004150001.1	XP_022780190.1	51.312	176	343	149	5	18	236	68.8	6	340	363	92	92	5	337	338	6.54e-117	342	878
NV2g004218000.1	NV2t004218001.1	XP_022790021.1	67.615	309	457	141	1	7	368	80.53	4	460	681	67	67	12	461	554	0	672	1734
NV2g004231000.1	NV2t004231001.1	XP_022781060.1	54.358	237	436	194	5	5	303	69.5	7	440	449	97	97	8	440	444	2.09e-170	486	1250
NV2g004233000.1	NV2t004233001.1	XP_022781055.1	52.37	232	443	204	7	7	299	67.49	14	453	457	96	96	4	442	445	6.46e-159	457	1175
NV2g004258000.1	NV2t004258001.1	XP_022779496.1	73.144	335	458	120	2	3	409	89.3	1	457	470	97	97	1	456	474	0	708	1828
NV2g004448000.1	NV2t004448001.1	XP_022791682.1	46.541	74	159	84	1	1	107	67.3	500	657	658	24	24	132	290	316	8.44e-49	173	439
NV2g004478000.1	NV2t004478001.1	XP_022788624.1	42.683	105	246	123	5	18	166	67.48	28	263	271	87	87	1	238	241	7.96e-72	221	562
NV2g004506000.1	NV2t004506001.1	XP_022799799.1	57.962	91	157	59	1	7	117	74.52	12	168	174	90	90	10	159	159	9.47e-67	201	510
NV2g004676000.1	NV2t004676001.1	XP_022794101.1	67.025	187	279	92	0	0	227	81.36	153	431	432	65	65	1	279	280	2.32e-142	407	1047
NV2g004684000.1	NV2t004684001.1	XP_022804314.1	47.059	96	204	104	3	4	136	66.67	6	208	223	91	91	2	202	213	3.07e-59	186	471
NV2g004794000.1	NV2t004794001.1	XP_022791733.1	47.534	106	223	108	5	9	150	67.26	115	333	333	66	66	30	247	247	8.9e-64	202	515
NV2g005100000.1	NV2t005100001.1	XP_022786709.1	49.081	187	381	190	2	4	261	68.5	34	412	420	90	90	95	473	478	5.16e-138	404	1037
NV2g005136000.1	NV2t005136001.1	XP_022781045.1	55.245	237	429	186	5	6	312	72.73	11	438	453	94	94	5	428	438	1.9e-172	491	1264
NV2g005137000.1	NV2t005137001.1	XP_022791729.1	60.185	260	432	164	6	8	325	75.23	5	432	466	92	92	5	432	433	0	540	1390
NV2g005138000.1	NV2t005138001.1	XP_022779601.1	52.956	215	406	190	1	1	299	73.65	14	418	432	94	94	14	419	429	4.39e-165	471	1212
NV2g005160000.1	NV2t005160002.1	XP_022790056.1	57.99	225	388	160	3	3	289	74.48	11	398	403	96	96	10	394	406	4.89e-174	491	1265
NV2g005188000.1	NV2t005188002.1	XP_022806664.1	50.647	235	464	189	12	40	308	66.38	830	1268	1271	38	35	1080	1528	1531	2.9e-127	429	1102
NV2g005194000.1	NV2t005194001.1	XP_022806666.1	46.903	106	226	95	3	25	132	58.41	19	235	235	92	92	19	228	233	6.39e-56	178	452
NV2g005199000.1	NV2t005199002.1	XP_022806673.1	81.439	215	264	48	1	1	230	87.12	1	264	264	100	100	1	263	263	1.08e-114	330	846
NV2g005200000.1	NV2t005200001.1	XP_022806651.1	82.528	222	269	47	0	0	240	89.22	3	271	295	91	91	1	269	293	1.52e-137	390	1002
NV2g005232000.1	NV2t005232001.1	XP_022786717.1	51.837	127	245	103	5	15	160	65.31	1	238	242	98	98	2	238	245	2.9e-64	200	509
NV2g005234000.1	NV2t005234001.1	XP_022786745.1	70.732	87	123	32	2	4	102	82.93	26	146	146	83	83	30	150	150	1.78e-48	153	386
NV2g005499000.1	NV2t005499001.1	XP_022788823.1	67.019	317	473	144	4	12	376	79.49	33	496	498	93	93	15	484	493	0	644	1660
NV2g005582000.1	NV2t005582001.1	XP_022807992.1	48.438	217	448	189	3	42	292	65.18	2	449	450	99	99	4	409	413	1.94e-151	436	1122
NV2g005704000.1	NV2t005704001.1	XP_022808313.1	61.613	382	620	205	8	33	466	75.16	10	599	599	98	98	672	1288	1288	0	724	1868
NV2g005916000.1	NV2t005916001.1	XP_022805377.1	46.444	418	900	446	10	36	527	58.56	785	1666	1934	75	46	164	1045	1440	0	774	1998
NV2g005918000.1	NV2t005918002.1	XP_022805384.1	64.969	421	648	223	4	4	509	78.55	154	800	903	86	72	759	1403	1627	0	877	2266
NV2g005948000.1	NV2t005948001.1	XP_022801240.1	56.291	255	453	188	6	10	330	72.85	4	449	534	84	84	11	460	641	0	547	1410
NV2g005949000.1	NV2t005949001.1	XP_022801238.1	40.502	371	916	427	19	118	528	57.64	1	804	1746	68	46	250	1159	1217	0	643	1658
NV2g006022000.1	NV2t006022001.1	XP_022805379.1	46.667	287	615	316	7	12	361	58.7	585	1191	1239	51	49	123	733	734	5.41e-174	532	1371
NV2g006032000.1	NV2t006032001.1	XP_022795019.1	50.959	239	469	224	3	6	328	69.94	26	489	549	85	85	23	490	529	1.9e-150	442	1137
NV2g006073000.1	NV2t006073001.1	XP_022786353.1	60.684	71	117	42	2	4	84	71.79	7	122	125	93	93	8	121	125	4.63e-45	142	359
NV2g006103000.1	NV2t006103001.1	XP_022799958.1	56	42	75	32	1	1	55	73.33	486	559	797	9	9	593	667	855	4.89e-07	53.9	128
NV2g006117000.1	NV2t006117001.1	XP_022806563.1	50.254	99	197	88	4	10	134	68.02	12	203	203	95	95	9	200	200	2.42e-56	177	449
NV2g006119000.1	NV2t006119001.1	XP_022806562.1	52.5	147	280	116	4	17	198	70.71	14	285	287	95	95	22	292	295	1.57e-87	263	672
NV2g006162000.1	NV2t006162001.1	XP_022809635.1	53.42	164	307	134	2	9	219	71.34	228	527	1143	26	26	8	312	631	3.62e-113	366	939
NV2g006163000.1	NV2t006163001.1	XP_022809637.1	56.308	183	325	129	3	13	238	73.23	26	350	411	79	79	1	312	346	6.11e-135	390	1003
NV2g006240000.1	NV2t006240001.1	XP_022804597.1	46.769	152	325	153	6	20	210	64.62	16	328	362	86	86	9	325	346	9.09e-97	291	745
NV2g006259000.1	NV2t006259001.1	XP_022808057.1	44.17	125	283	137	8	21	178	62.9	1	274	275	99	99	1	271	340	2.76e-60	194	494
NV2g006295000.1	NV2t006295002.1	XP_022802952.1	41.026	64	156	86	2	6	91	58.33	726	875	878	17	17	395	550	554	9.02e-27	116	290
NV2g006346000.1	NV2t006346001.1	XP_022809219.1	27.888	70	251	160	6	21	116	46.22	733	972	1000	48	24	496	736	776	1.75e-25	114	284
NV2g006401000.1	NV2t006401002.1	XP_022788884.1	70.414	238	338	92	2	8	283	83.73	1	338	339	99	99	1	330	330	7.1e-177	493	1269
NV2g006436000.1	NV2t006436001.1	XP_022804294.1	32.956	233	707	391	16	83	370	52.33	36	725	774	89	89	31	671	720	1.24e-117	371	953
NV2g006438000.1	NV2t006438001.1	XP_022799985.1	49.863	182	365	169	5	14	237	64.93	7	366	505	73	71	47	402	415	6.79e-121	361	926
NV2g006439000.1	NV2t006439001.1	XP_022799981.1	42.743	586	1371	623	35	162	773	56.38	13	1277	1524	83	83	9	1323	1491	0	983	2541
NV2g006441000.1	NV2t006441001.1	XP_022799962.1	48.482	463	955	380	21	112	592	61.99	350	1275	1275	73	73	1381	2252	2252	0	840	2170
NV2g006443000.1	NV2t006443001.1	XP_022810609.1	36.623	167	456	185	16	104	227	49.78	640	1041	1360	41	30	356	761	1178	3.42e-75	273	699
NV2g006444000.1	NV2t006444001.1	XP_022799980.1	51.083	684	1339	484	25	171	860	64.23	13	1194	1275	93	93	14	1338	2407	0	1303	3371
NV2g006479000.1	NV2t006479001.1	XP_022806827.1	58.882	179	304	119	3	6	226	74.34	100	397	400	75	75	56	359	372	9.36e-134	388	996
NV2g006480000.1	NV2t006480001.1	XP_022794990.1	36.323	81	223	130	5	12	123	55.16	113	328	332	65	65	178	395	397	2.97e-40	145	367
NV2g006484000.1	NV2t006484001.1	XP_022804513.1	57.278	181	316	127	2	8	231	73.1	73	385	385	81	81	80	390	390	7.04e-130	378	971
NV2g006485000.1	NV2t006485001.1	XP_022804515.1	51.705	182	352	155	4	15	245	69.6	4	350	350	99	99	18	359	359	8.87e-133	383	983
NV2g006517000.1	NV2t006517001.1	XP_022807218.1	62.974	216	343	100	1	27	259	75.51	128	443	467	68	68	53	395	457	1.37e-157	454	1169
NV2g006716000.1	NV2t006716003.1	XP_022786325.1	51.976	171	329	120	5	38	217	65.96	1	294	294	100	100	1	326	326	4.85e-106	311	798
NV2g006749000.1	NV2t006749001.1	XP_022801241.1	54.628	301	551	206	11	44	368	66.79	8	546	960	76	56	11	529	765	0	569	1466
NV2g006786000.1	NV2t006786004.1	XP_022801214.1	54.405	352	647	217	21	78	434	67.08	1	604	604	100	100	36	647	647	0	606	1563
NV2g006994000.1	NV2t006994001.1	XP_022800270.1	56.442	184	326	120	5	22	221	67.79	310	634	639	90	51	209	513	521	1.36e-111	345	885
NV2g007009000.1	NV2t007009001.1	XP_022781966.1	58.81	257	437	177	2	3	325	74.37	1	437	437	100	100	1	434	434	0	539	1388
NV2g007139000.1	NV2t007139001.1	XP_022794904.1	49.342	150	304	126	7	28	201	66.12	46	331	338	85	85	56	349	349	1.52e-96	290	742
NV2g007357000.1	NV2t007357001.1	XP_022785011.1	50.24	209	416	193	5	14	284	68.27	18	430	465	89	89	18	422	441	5.12e-150	434	1117
NV2g007733000.1	NV2t007733001.1	XP_022790847.1	66.093	538	814	254	8	22	645	79.24	4	808	808	99	99	2	802	802	0	1125	2909
NV2g008258000.1	NV2t008258001.1	XP_022785506.1	33.415	136	407	219	6	52	214	52.58	334	700	701	54	52	439	833	833	1.57e-71	249	635
NV2g008259000.1	NV2t008259006.1	XP_022785541.1	40.154	365	909	479	17	65	547	60.18	1409	2300	2301	63	39	531	1391	2013	0	627	1617
NV2g008302000.1	NV2t008302001.1	XP_022781764.1	58.772	67	114	44	1	3	82	71.93	28	138	141	79	79	27	140	140	9.7e-39	128	321
NV2g008415000.1	NV2t008415001.1	XP_022785563.1	26.407	61	231	133	7	37	94	40.69	371	593	789	28	28	217	418	427	8.63e-13	71.6	174
NV2g008421000.1	NV2t008421001.1	XP_022781205.1	56.744	366	645	249	14	30	460	71.32	1	626	626	100	100	1	634	634	0	687	1773
NV2g008625000.1	NV2t008625001.1	XP_022796687.1	64.416	353	548	148	7	47	412	75.18	1	525	525	100	100	1	524	524	0	702	1813
NV2g008633000.1	NV2t008633001.1	XP_022785540.1	43.304	194	448	150	11	104	241	53.79	34	467	511	85	85	671	1028	1064	4.07e-100	325	832
NV2g008660000.1	NV2t008660001.1	XP_022797262.1	61.496	1463	2379	766	37	150	1763	74.11	2	2289	2289	99	99	1	2320	2320	0	2679	6945
NV2g008737000.1	NV2t008737001.1	XP_022797283.1	60.739	444	731	262	6	25	550	75.24	1	725	725	100	100	6	717	717	0	917	2371
NV2g008766000.1	NV2t008766001.1	XP_022797037.1	66.287	291	439	144	1	4	347	79.04	4	442	443	99	99	6	440	441	0	611	1576
NV2g008962000.1	NV2t008962001.1	XP_022782519.1	49.011	223	455	220	7	12	308	67.69	1	451	483	93	93	1	447	492	1.06e-158	459	1181
NV2g008976000.1	NV2t008976001.1	XP_022805488.1	72.926	633	868	187	13	48	696	80.18	1	827	860	96	96	1	861	863	0	1256	3251
NV2g008977000.1	NV2t008977001.1	XP_022783601.1	57.046	506	887	327	11	54	626	70.57	14	878	1049	82	82	7	861	1310	0	1007	2604
NV2g009104000.1	NV2t009104001.1	XP_022785520.1	33.603	83	247	132	11	32	120	48.58	1	223	228	98	98	1	239	244	7.8e-21	87.8	216
NV2g009203000.1	NV2t009203002.1	XP_022794921.1	57.194	318	556	212	9	26	390	70.14	23	563	565	96	96	9	553	555	0	618	1593
NV2g009497000.1	NV2t009497003.1	XP_022782989.1	41.6	104	250	121	7	25	141	56.4	16	249	252	93	93	31	271	273	6.8e-48	159	403
NV2g009508000.1	NV2t009508001.1	XP_022779845.1	44.156	136	308	136	5	36	170	55.19	116	390	415	66	66	101	405	413	7.29e-70	226	576
NV2g009511000.1	NV2t009511001.1	XP_022799602.1	61.817	905	1464	406	16	153	1087	74.25	3	1316	1316	99	99	1336	2796	3359	0	1859	4815
NV2g009534000.1	NV2t009534001.1	XP_022779932.1	45.294	154	340	157	10	29	203	59.71	5	336	348	95	95	6	324	340	7.02e-81	250	638
NV2g009655000.1	NV2t009655001.1	XP_022779840.1	38.15	132	346	182	8	32	184	53.18	3	320	788	78	40	1	342	799	4.77e-57	209	532
NV2g009676000.1	NV2t009676001.1	XP_022798924.1	42.807	122	285	145	4	18	202	70.88	1	268	335	80	80	1	284	374	1.06e-86	265	678
NV2g009740000.1	NV2t009740001.1	XP_022789516.1	35.87	99	276	133	7	44	139	50.36	35	295	321	81	81	24	270	428	1.53e-38	141	356
NV2g009746000.1	NV2t009746001.1	XP_022789501.1	76.415	81	106	18	3	7	88	83.02	180	285	341	31	31	225	323	375	9.37e-38	139	349
NV2g009747000.1	NV2t009747001.1	XP_022789500.1	62.016	80	129	41	3	8	87	67.44	55	175	252	48	48	253	381	408	8.6e-43	150	378
NV2g009810000.1	NV2t009810001.1	XP_022802604.1	59.465	311	523	210	1	2	400	76.48	1	523	527	99	99	80	600	600	0	662	1709
NV2g009849000.1	NV2t009849001.1	XP_022798902.1	46.982	467	994	432	19	95	619	62.27	1	910	910	100	100	130	1112	1112	0	832	2150
NV2g009863000.1	NV2t009863001.1	XP_022802603.1	53.928	254	471	188	7	29	334	70.91	109	559	561	80	80	75	536	537	1.63e-177	512	1318
NV2g009872000.1	NV2t009872001.1	XP_022782970.1	38.851	169	435	202	16	64	213	48.97	29	455	579	74	74	42	420	893	2.15e-42	163	413
NV2g009880000.1	NV2t009880001.1	XP_022780791.1	55.469	71	128	51	2	6	87	67.97	54	181	427	30	30	23	144	422	1.48e-38	144	363
NV2g009990000.1	NV2t009990003.1	XP_022784731.1	43.052	505	1173	553	27	115	675	57.54	42	1175	1267	90	90	63	1159	1214	0	866	2237
NV2g010004000.1	NV2t010004001.1	XP_022779882.1	67.556	152	225	67	1	6	169	75.11	19	237	241	91	91	1	225	226	7.96e-111	318	814
NV2g010005000.1	NV2t010005001.1	XP_022779933.1	55.67	108	194	75	3	11	137	70.62	12	204	206	94	94	19	202	204	8.37e-76	227	578
NV2g010006000.1	NV2t010006001.1	XP_022779906.1	74.346	142	191	44	1	5	160	83.77	1	186	193	96	96	5	195	200	2.06e-104	298	764
NV2g010077000.1	NV2t010077002.1	XP_022780819.1	61.565	181	294	111	1	2	207	70.41	19	312	312	94	94	33	324	333	7.44e-124	358	918
NV2g010134000.1	NV2t010134001.1	XP_022783623.1	62.051	121	195	60	2	14	140	71.79	30	211	212	86	86	54	247	247	2.36e-83	248	632
NV2g010217000.1	NV2t010217004.1	XP_022780701.1	57.7	281	487	205	1	1	364	74.74	6	492	492	99	99	84	569	569	0	608	1568
NV2g010248000.1	NV2t010248001.1	XP_022791757.1	43.913	101	230	102	8	27	123	53.48	319	543	544	41	41	29	236	271	1.2e-41	150	380
NV2g010264000.1	NV2t010264001.1	XP_022791764.1	52.174	84	161	74	1	3	107	66.46	182	339	343	46	46	47	207	213	2.4e-53	175	443
NV2g010271000.1	NV2t010271001.1	XP_022786116.1	81.481	242	297	51	3	4	262	88.22	9	301	302	97	97	13	309	310	0	508	1307
NV2g010332000.1	NV2t010332001.1	XP_022789521.1	58.545	161	275	83	9	31	193	70.18	187	432	545	78	45	252	524	668	9.08e-90	290	741
NV2g010334000.1	NV2t010334001.1	XP_022789479.1	50	82	164	77	4	5	109	66.46	3	162	911	18	18	8	170	720	8.51e-38	152	383
NV2g010341000.1	NV2t010341001.1	XP_022789491.1	41.322	519	1256	521	38	216	680	54.14	112	1280	1292	99	90	261	1387	6030	0	751	1938
NV2g010343000.1	NV2t010343001.1	XP_022789497.1	60.947	103	169	45	6	21	115	68.05	564	725	725	22	22	1095	1249	1353	4.87e-32	134	337
NV2g010358000.1	NV2t010358001.1	XP_022786556.1	56.198	68	121	53	0	0	96	79.34	68	188	492	40	25	47	167	316	8.42e-34	130	326
NV2g010387000.1	NV2t010387001.1	XP_022780705.1	48.81	738	1512	626	24	148	984	65.08	24	1492	1495	98	98	25	1431	1434	0	1462	3786
NV2g010388000.1	NV2t010388001.1	XP_022780748.1	31.027	139	448	279	10	30	226	50.45	328	756	891	59	48	696	1132	1207	6.06e-63	231	590
NV2g010390000.1	NV2t010390001.1	XP_022780795.1	41.017	258	629	335	10	36	363	57.71	38	644	759	80	80	5	619	854	1.76e-159	484	1245
NV2g010391000.1	NV2t010391001.1	XP_022778711.1	36.565	132	361	210	8	19	198	54.85	1	358	885	40	40	7	351	358	2.54e-62	215	547
NV2g010419000.1	NV2t010419001.1	XP_022802617.1	47.074	177	376	174	5	25	230	61.17	30	390	430	84	84	26	391	391	4.08e-117	347	891
NV2g010450000.1	NV2t010450001.1	XP_022780783.1	42.683	315	738	402	9	21	458	62.06	14	736	736	98	98	25	756	757	0	600	1546
NV2g010470000.1	NV2t010470001.1	XP_022792512.1	49.485	96	194	89	3	9	122	62.89	1	189	1495	13	13	32	221	222	2.83e-54	189	480
NV2g010539000.1	NV2t010539001.1	XP_022780781.1	57.112	526	921	378	10	17	683	74.16	9	922	924	99	99	8	918	919	0	1097	2837
NV2g010559000.1	NV2t010559001.1	XP_022802620.1	54.595	101	185	73	4	11	137	74.05	45	221	225	79	79	29	210	216	4.06e-64	198	504
NV2g010560000.1	NV2t010560001.1	XP_022802621.1	60.097	247	411	161	3	3	303	73.72	17	427	437	94	94	17	424	442	0	518	1333
NV2g010591000.1	NV2t010591001.1	XP_022801744.1	33.498	406	1212	627	30	179	608	50.17	1	1163	1334	87	87	6	1087	1189	0	637	1643
NV2g010629000.1	NV2t010629001.1	XP_022804144.1	38.873	269	692	296	25	127	352	50.87	1	604	666	91	91	83	735	766	3.91e-85	283	725
NV2g010646000.1	NV2t010646002.1	XP_022785720.1	58.427	52	89	36	1	1	66	74.16	39	127	160	56	56	32	119	119	5.84e-24	90.5	223
NV2g010686000.1	NV2t010686001.1	XP_022787371.1	83.051	49	59	10	0	0	51	86.44	1	59	181	33	33	1	59	143	1.43e-17	75.5	184
NV2g010707000.1	NV2t010707001.1	XP_022795932.1	30.201	45	149	97	3	7	69	46.31	10	154	198	73	73	15	160	182	1.37e-12	63.5	153
NV2g010782000.1	NV2t010782001.1	XP_022801034.1	71.429	390	546	151	4	5	457	83.7	17	559	561	97	97	7	550	550	0	807	2085
NV2g010892000.1	NV2t010892001.1	XP_022788493.1	42.241	49	116	67	0	0	75	64.66	98	213	213	54	54	139	254	373	5.81e-25	100	249
NV2g010897000.1	NV2t010897001.1	XP_022793139.1	56.459	236	418	140	9	42	291	69.62	1	382	382	100	100	1	412	412	5.18e-159	453	1165
NV2g010997000.1	NV2t010997001.1	XP_022788521.1	35.501	333	938	487	29	118	499	53.2	973	1839	1839	54	47	445	1335	1336	1.09e-136	461	1186
NV2g011025000.1	NV2t011025001.1	XP_022791283.1	48.615	193	397	170	12	34	244	61.46	1	380	399	95	95	1	380	380	9.8e-97	294	752
NV2g011028000.1	NV2t011028001.1	XP_022789946.1	57.48	146	254	107	1	1	188	74.02	1	253	471	78	54	1	254	339	7.41e-101	305	782
NV2g011056000.1	NV2t011056001.1	XP_022785594.1	67.151	370	551	146	2	35	426	77.31	23	571	583	94	94	25	542	558	0	773	1996
NV2g011057000.1	NV2t011057002.1	XP_022782618.1	47.374	478	1009	503	14	28	661	65.51	7	1003	1004	99	99	12	1004	1004	0	910	2351
NV2g011074000.1	NV2t011074001.1	XP_022788523.1	74.019	396	535	126	6	13	451	84.3	1	530	534	99	99	1	527	1146	0	796	2055
NV2g011077000.1	NV2t011077001.1	XP_022788525.1	56.415	299	530	208	7	23	392	73.96	30	538	538	95	95	18	545	545	0	601	1549
NV2g011233000.1	NV2t011233001.1	XP_022809973.1	39.638	197	497	262	12	38	268	53.92	91	565	576	82	82	61	541	553	1.68e-98	310	794
NV2g011286000.1	NV2t011286001.1	XP_022793143.1	63.364	275	434	152	4	7	346	79.72	3	431	902	48	48	2620	3051	3181	0	585	1509
NV2g011317000.1	NV2t011317001.1	XP_022792048.1	67.785	404	596	175	7	17	482	80.87	1	590	595	99	99	8	592	601	0	852	2201
NV2g011375000.1	NV2t011375001.1	XP_022793119.1	25.373	119	469	303	11	47	213	45.42	23	460	476	92	92	8	460	460	2.81e-34	134	337
NV2g011394000.1	NV2t011394001.1	XP_022794509.1	42.614	326	765	357	13	82	434	56.73	5	758	760	99	99	29	722	747	0	622	1604
NV2g011395000.1	NV2t011395001.1	XP_022803365.1	68.269	142	208	66	0	0	169	81.25	2	209	215	97	97	3	210	216	1.75e-106	305	782
NV2g011424000.1	NV2t011424003.1	XP_022803917.1	25.344	92	363	230	12	41	163	44.9	13	368	373	95	95	13	341	347	4.13e-29	115	289
NV2g011608000.1	NV2t011608001.1	XP_022797588.1	59.236	93	157	60	3	4	102	64.97	11	165	178	87	87	29	183	213	1.01e-51	165	417
NV2g011673000.1	NV2t011673001.1	XP_022787295.1	50.187	269	536	249	4	18	367	68.47	50	568	582	89	89	3	537	550	5.44e-167	486	1252
NV2g011675000.1	NV2t011675001.1	XP_022787272.1	42.58	241	566	297	9	28	357	63.07	25	572	642	85	85	27	582	639	1.94e-151	452	1162
NV2g011718000.1	NV2t011718001.1	XP_022797406.1	39.881	67	168	77	7	24	92	54.76	147	301	303	51	51	908	1064	1085	5.82e-25	105	262
NV2g011802000.1	NV2t011802002.1	XP_022799416.1	79.381	154	194	39	1	1	168	86.6	1	193	198	97	97	1	194	398	3.27e-16	75.9	185
NV2g011802000.1	NV2t011802003.1	XP_022799451.1	37.349	155	415	252	5	8	240	57.83	16	428	428	96	96	9	417	421	8.4e-99	301	772
NV2g011823000.1	NV2t011823001.1	XP_022803634.1	36.471	124	340	172	9	44	163	47.94	1	304	343	89	89	5	336	353	1.5e-49	169	428
NV2g011824000.1	NV2t011824001.1	XP_022803627.1	43.147	340	788	311	20	137	433	54.95	10	675	675	99	99	11	783	788	0	559	1441
NV2g011825000.1	NV2t011825001.1	XP_022803637.1	33.241	120	361	181	13	60	168	46.54	1	336	389	86	86	1	326	383	4.78e-25	105	262
NV2g011829000.1	NV2t011829001.1	XP_022785131.1	55.924	557	996	417	13	22	711	71.39	30	1007	1007	97	97	40	1031	1031	0	1163	3009
NV2g011931000.1	NV2t011931002.1	XP_022796317.1	57.441	413	719	272	8	34	526	73.16	28	717	717	96	96	14	727	727	0	815	2106
NV2g012063000.1	NV2t012063001.1	XP_022791761.1	50	99	198	93	3	6	128	64.65	83	279	279	71	71	60	252	284	1.9e-61	196	497
NV2g012063000.1	NV2t012063002.1	XP_022791680.1	41.5	166	400	194	9	40	217	54.25	7	389	389	98	98	4	380	407	7.71e-63	207	526
NV2g012144000.1	NV2t012144001.1	XP_022801930.1	33.962	162	477	257	12	58	254	53.25	527	962	964	45	45	1143	1602	1638	1.52e-58	220	560
NV2g012315000.1	NV2t012315001.1	XP_022795960.1	81.59	390	478	86	1	2	424	88.7	84	559	559	85	85	81	558	558	0	820	2118
NV2g012363000.1	NV2t012363001.1	XP_022806991.1	59.485	254	427	173	0	0	338	79.16	14	440	440	97	97	10	436	436	0	564	1453
NV2g012483000.1	NV2t012483001.1	XP_022791592.1	72.423	260	359	95	3	4	309	86.07	5	363	363	99	99	4	358	358	0	557	1435
NV2g012511000.1	NV2t012511001.1	XP_022791864.1	71.75	447	623	168	2	8	521	83.63	1	617	617	100	100	4	624	624	0	953	2464
NV2g012529000.1	NV2t012529002.1	XP_022794318.1	46.942	284	605	292	11	29	382	63.14	7	593	596	98	98	1	594	598	0	551	1419
NV2g012534000.1	NV2t012534001.1	XP_022788500.1	29.054	129	444	185	21	130	207	46.62	302	708	713	57	57	281	631	675	7.3e-23	104	259
NV2g012535000.1	NV2t012535001.1	XP_022788551.1	32.039	66	206	91	9	49	103	50	87	271	569	33	33	167	344	637	3.7e-17	85.1	209
NV2g012539000.1	NV2t012539001.1	XP_022788498.1	38.075	91	239	118	7	30	121	50.63	357	578	595	37	37	454	679	733	1.59e-26	115	287
NV2g012540000.1	NV2t012540001.1	XP_022788566.1	49.65	71	143	59	3	13	92	64.34	54	189	198	69	69	6	142	149	3.33e-40	134	337
NV2g012542000.1	NV2t012542001.1	XP_022788540.1	37.329	218	584	239	24	127	271	46.4	20	541	546	96	96	16	534	583	1.11e-48	177	450
NV2g012552000.1	NV2t012552001.1	XP_022800620.1	46.465	46	99	51	1	2	68	68.69	50	146	366	27	27	37	135	506	5.02e-23	100	249
NV2g012553000.1	NV2t012553001.1	XP_022800610.1	46.429	78	168	67	6	23	102	60.71	701	852	917	17	17	665	825	832	1.13e-28	124	310
NV2g012554000.1	NV2t012554001.1	XP_022800621.1	54.545	42	77	34	1	1	55	71.43	180	255	764	43	10	1	77	547	4.18e-17	85.5	210
NV2g012573000.1	NV2t012573001.1	XP_022782596.1	50.607	125	247	112	3	10	164	66.4	50	286	286	83	83	38	284	284	1.42e-80	245	625
NV2g012589000.1	NV2t012589001.1	XP_022800563.1	48.184	199	413	209	4	5	276	66.83	14	426	428	96	96	19	426	430	1.66e-146	424	1089
NV2g012621000.1	NV2t012621001.1	XP_022804275.1	62.245	122	196	66	3	8	141	71.94	3	197	197	99	99	2	190	196	6e-25	96.7	239
NV2g012691000.1	NV2t012691002.1	XP_022803625.1	42.718	88	206	96	9	22	113	54.85	427	621	642	30	30	449	643	666	1.71e-27	118	295
NV2g012695000.1	NV2t012695003.1	XP_022801956.1	63.672	326	512	169	7	17	408	79.69	60	561	721	70	70	42	546	689	0	640	1651
NV2g012708000.1	NV2t012708001.1	XP_022807057.1	36.228	146	403	210	10	47	203	50.37	1	395	398	99	99	1	364	365	1.78e-53	181	460
NV2g012709000.1	NV2t012709001.1	XP_022807073.1	56.034	65	116	51	0	0	84	72.41	8	123	380	31	31	17	132	423	1.91e-34	132	331
NV2g012783000.1	NV2t012783001.1	XP_022800599.1	66.957	77	115	36	1	2	95	82.61	42	156	172	67	67	856	968	979	1.72e-52	179	454
NV2g012788000.1	NV2t012788001.1	XP_022791836.1	49.77	108	217	92	4	17	130	59.91	1	217	254	85	85	1	200	227	4.34e-64	199	507
NV2g012806000.1	NV2t012806001.1	XP_022788751.1	57.003	175	307	123	1	9	231	75.24	33	330	336	89	89	17	323	323	1.29e-130	375	964
NV2g012814000.1	NV2t012814003.1	XP_022791304.1	47.75	191	400	170	11	39	244	61	20	402	407	94	94	23	400	405	2.12e-99	302	773
NV2g012871000.1	NV2t012871003.1	XP_022782451.1	56.534	199	352	125	8	28	257	73.01	1	336	339	99	99	1	340	342	5.46e-137	392	1008
NV2g012896000.1	NV2t012896001.1	XP_022788267.1	59.547	184	309	122	2	3	234	75.73	582	890	890	35	35	209	514	514	1.41e-140	427	1099
NV2g012897000.1	NV2t012897001.1	XP_022788336.1	59.341	216	364	137	8	11	272	74.73	1	354	357	99	99	1	363	363	7.44e-146	417	1071
NV2g012942000.1	NV2t012942001.1	XP_022779303.1	44.444	92	207	96	5	19	120	57.97	1	194	198	98	98	1	201	211	7.74e-45	148	373
NV2g012993000.1	NV2t012993001.1	XP_022778970.1	30.569	129	422	272	10	21	205	48.58	22	434	463	89	89	23	432	475	7.73e-56	192	489
NV2g013049000.1	NV2t013049001.1	XP_022799395.1	63.83	60	94	34	0	0	75	79.79	8	101	683	40	14	1	94	638	1.87e-27	118	295
NV2g013058000.1	NV2t013058002.1	XP_022807234.1	61.787	401	649	241	5	7	497	76.58	161	805	805	80	80	43	688	688	0	849	2194
NV2g013059000.1	NV2t013059001.1	XP_022807225.1	44.728	140	313	158	6	15	214	68.37	1055	1360	1361	22	22	1057	1361	1362	2.72e-74	272	696
NV2g013095000.1	NV2t013095001.1	XP_022789531.1	61.377	205	334	122	3	7	243	72.75	1	329	330	99	99	1	332	333	4.48e-142	405	1040
NV2g013194000.1	NV2t013194001.1	XP_022798874.1	50	294	588	269	10	25	410	69.73	72	644	646	89	89	1	578	579	0	615	1585
NV2g013246000.1	NV2t013246001.1	XP_022789836.1	52.871	221	418	185	6	12	281	67.22	45	456	586	70	70	71	482	521	4.44e-143	424	1091
NV2g013261000.1	NV2t013261001.1	XP_022777975.1	32.852	182	554	305	22	67	286	51.62	16	543	544	97	97	21	533	534	5.28e-58	202	513
NV2g013300000.1	NV2t013300001.1	XP_022799180.1	31.186	92	295	192	7	11	152	51.53	1	290	300	97	97	1	289	322	5.5e-37	134	337
NV2g013304000.1	NV2t013304001.1	XP_022782690.1	39.458	131	332	182	3	19	189	56.93	44	357	371	85	85	19	349	358	1.1e-64	209	533
NV2g013345000.1	NV2t013345001.1	XP_022803868.1	45.051	223	495	245	9	27	323	65.25	1	473	496	95	95	1	490	512	1.81e-148	434	1117
NV2g013381000.1	NV2t013381001.1	XP_022808805.1	32.588	335	1028	481	38	212	489	47.57	1	877	877	100	100	1	967	972	1.8e-115	375	964
NV2g013424000.1	NV2t013424001.1	XP_022798609.1	62.343	596	956	339	7	21	730	76.36	1	938	938	100	100	861	1813	1813	0	1258	3256
NV2g013439000.1	NV2t013439001.1	XP_022805342.1	44.17	125	283	151	3	7	165	58.3	69	350	371	76	76	52	328	334	1.37e-76	239	611
NV2g013450000.1	NV2t013450001.1	XP_022805407.1	46.445	307	661	331	7	23	429	64.9	3	656	658	99	99	1	645	680	0	610	1574
NV2g013500000.1	NV2t013500001.1	XP_022805231.1	57.406	872	1519	625	10	22	1145	75.38	11	1520	1520	99	99	13	1518	1520	0	1835	4754
NV2g013521000.1	NV2t013521001.1	XP_022801951.1	35.756	182	509	291	11	36	280	55.01	13	514	539	93	93	67	546	561	2.63e-99	311	797
NV2g013532000.1	NV2t013532002.1	XP_022789838.1	45.914	309	673	294	9	70	422	62.7	1	616	618	99	99	1	660	668	0	540	1392
NV2g013584000.1	NV2t013584001.1	XP_022798834.1	48.905	536	1096	474	19	86	705	64.32	119	1206	1206	90	90	351	1368	1371	0	1028	2658
NV2g013702000.1	NV2t013702001.1	XP_022802564.1	58.904	172	292	117	2	3	212	72.6	92	383	383	76	76	117	405	405	2.05e-129	377	969
NV2g013804000.1	NV2t013804004.1	XP_022799583.1	80.81	379	469	89	1	1	435	92.75	1	468	480	98	98	1	469	483	0	815	2104
NV2g013830000.1	NV2t013830001.1	XP_022789219.1	39.181	67	171	92	4	12	96	56.14	102	264	282	58	58	260	426	432	1.22e-21	94	232
NV2g013897000.1	NV2t013897001.1	XP_022800175.1	47.491	265	558	277	6	16	365	65.41	2	548	553	99	99	7	559	566	0	524	1350
NV2g013928000.1	NV2t013928001.1	XP_022807541.1	52.331	348	665	245	11	72	439	66.02	14	611	618	97	97	3	662	681	0	644	1660
NV2g014005000.1	NV2t014005001.1	XP_022797792.1	62.274	1517	2436	911	8	8	1856	76.19	2	2433	2433	100	99	211	2642	4100	0	3239	8399
NV2g014012000.1	NV2t014012001.1	XP_022797814.1	43.802	53	121	52	2	16	74	61.16	134	250	454	26	26	153	261	492	9.56e-29	118	296
NV2g014106000.1	NV2t014106001.1	XP_022805218.1	66.402	251	378	123	2	4	295	78.04	7	380	385	97	97	10	387	392	0	518	1333
NV2g014187000.1	NV2t014187003.1	XP_022780135.1	81.119	232	286	52	2	2	257	89.86	1	286	286	100	100	1	284	284	8.75e-178	491	1265
NV2g014197000.1	NV2t014197001.1	XP_022807844.1	35.67	173	485	280	17	32	258	53.2	7	483	588	81	81	8	468	1003	5.66e-67	235	600
NV2g014230000.1	NV2t014230001.1	XP_022797704.1	59.433	482	811	296	6	33	620	76.45	1	805	805	100	100	2	785	785	0	1021	2641
NV2g014236000.1	NV2t014236001.1	XP_022789565.1	46.239	252	545	272	7	21	354	64.95	2	531	531	99	99	6	544	544	6.87e-171	494	1272
NV2g014320000.1	NV2t014320001.1	XP_022784077.1	43.137	66	153	80	4	7	95	62.09	11	157	479	31	31	5	156	722	3.22e-34	136	343
NV2g014321000.1	NV2t014321002.1	XP_022805443.1	52.336	168	321	150	2	3	223	69.47	8	327	360	89	89	13	331	344	4.59e-112	330	846
NV2g014373000.1	NV2t014373001.1	XP_022803947.1	40.401	141	349	194	9	14	212	60.74	1	342	373	92	92	4	345	373	2.33e-84	261	666
NV2g014428000.1	NV2t014428001.1	XP_022777526.1	62.871	127	202	75	0	0	168	83.17	35	236	574	35	35	39	240	247	3.97e-101	306	784
NV2g014445000.1	NV2t014445001.1	XP_022783605.1	33.974	53	156	97	1	6	86	55.13	1	150	215	70	70	1	156	217	3.28e-26	100	250
NV2g014459000.1	NV2t014459002.1	XP_022810126.1	69.304	219	316	81	10	16	250	79.11	14	315	315	96	96	6	319	319	2.32e-138	394	1012
NV2g014549000.1	NV2t014549003.1	XP_022788789.1	60.303	199	330	127	3	4	251	76.06	7	335	530	62	62	3	329	362	1.22e-147	428	1100
NV2g014591000.1	NV2t014591001.1	XP_022797907.1	65.438	568	868	250	5	50	666	76.73	11	877	887	98	98	7	825	832	0	1141	2952
NV2g014625000.1	NV2t014625003.1	XP_022803119.1	51.124	91	178	87	0	0	123	69.1	2	179	281	63	63	920	1097	1787	8.08e-59	202	514
NV2g014741000.1	NV2t014741003.1	XP_022792496.1	33.618	197	586	373	11	16	309	52.73	621	1195	1736	33	33	452	1032	1481	4.7e-81	296	757
NV2g014941000.1	NV2t014941003.1	XP_022799159.1	58.013	181	312	122	4	9	229	73.4	3	314	314	99	99	4	306	306	5.41e-122	352	903
NV2g015027000.1	NV2t015027001.1	XP_022801713.1	62.389	141	226	56	7	29	165	73.01	6	204	204	98	98	5	228	228	8.3e-88	258	659
NV2g015213000.1	NV2t015213001.1	XP_022788776.1	46.835	185	395	183	8	27	238	60.25	82	472	475	82	82	89	460	485	5.79e-107	326	836
NV2g015241000.1	NV2t015241001.1	XP_022803865.1	50.572	221	437	190	8	26	287	65.68	56	481	491	87	87	46	467	512	1.17e-148	434	1117
NV2g015283000.1	NV2t015283001.1	XP_022807232.1	50.963	291	571	240	15	40	380	66.55	457	1004	1061	52	52	85	638	968	1.39e-166	516	1328
NV2g015546000.1	NV2t015546001.1	XP_022798679.1	60.27	581	964	363	4	20	727	75.41	5	967	977	99	99	32	976	980	0	1224	3167
NV2g015638000.1	NV2t015638001.1	XP_022780959.1	59.145	401	678	241	10	36	495	73.01	30	703	704	96	96	30	675	677	0	827	2136
NV2g015639000.1	NV2t015639001.1	XP_022803524.1	58.244	272	467	143	2	52	327	70.02	203	665	687	67	67	1	419	476	0	548	1411
NV2g015739000.1	NV2t015739001.1	XP_022780945.1	44.358	114	257	102	7	41	149	57.98	25	260	265	89	89	32	268	283	5.24e-53	174	440
NV2g015810000.1	NV2t015810001.1	XP_022792077.1	47.003	149	317	161	1	7	202	63.72	3	312	312	99	99	1	317	318	1.23e-101	301	770
NV2g015854000.1	NV2t015854001.1	XP_022782650.1	39.2	147	375	210	8	18	215	57.33	13	379	387	95	95	9	373	383	2.12e-83	259	662
NV2g015874000.1	NV2t015874001.1	XP_022789750.1	60.486	274	453	166	6	13	348	76.82	18	465	501	96	89	28	472	591	0	557	1436
NV2g015883000.1	NV2t015883001.1	XP_022785803.1	43.342	166	383	209	3	8	243	63.45	292	671	678	56	56	519	896	901	1.33e-107	347	889
NV2g015888000.1	NV2t015888001.1	XP_022802084.1	53.289	243	456	167	4	46	292	64.04	7	462	503	99	91	11	420	648	4.54e-149	441	1134
NV2g015888000.1	NV2t015888002.1	XP_022802083.1	56.667	289	510	174	5	47	336	65.88	7	515	516	99	99	11	474	475	0	529	1362
NV2g015933000.1	NV2t015933001.1	XP_022800380.1	37.579	298	793	423	16	72	412	51.95	1188	1918	2030	36	36	1844	2626	2828	5.38e-165	565	1455
NV2g015937000.1	NV2t015937001.1	XP_022800540.1	50.905	225	442	206	5	11	298	67.42	17	452	494	88	88	16	452	576	5.37e-154	451	1159
NV2g016007000.1	NV2t016007001.1	XP_022803523.1	62.233	379	609	220	6	10	475	78	12	613	614	98	98	15	620	620	0	811	2095
NV2g016008000.1	NV2t016008001.1	XP_022803521.1	67.521	395	585	183	4	7	475	81.2	308	889	910	64	64	76	656	673	0	865	2235
NV2g016021000.1	NV2t016021001.1	XP_022809333.1	67.5	378	560	182	0	0	464	82.86	10	569	569	98	98	58	617	617	0	811	2096
NV2g016033000.1	NV2t016033001.1	XP_022798441.1	45.128	88	195	106	1	1	127	65.13	28	221	301	64	64	29	223	277	3.64e-53	175	443
NV2g016097000.1	NV2t016097003.1	XP_022808391.1	44.895	299	666	339	12	28	422	63.36	1	655	664	99	99	1	649	691	0	571	1471
NV2g016318000.1	NV2t016318001.1	XP_022785817.1	39.881	134	336	194	5	8	203	60.42	57	389	762	44	44	48	378	599	8.28e-76	256	655
NV2g016334000.1	NV2t016334001.1	XP_022783895.1	56.513	282	499	196	6	21	341	68.34	4	481	503	95	95	299	797	820	0	528	1360
NV2g016360000.1	NV2t016360001.1	XP_022797092.1	44.444	132	297	144	5	21	179	60.27	499	787	793	59	36	664	947	949	5.51e-78	271	692
NV2g016383000.1	NV2t016383001.1	XP_022808616.1	41.909	101	241	122	8	18	145	60.17	15	244	245	94	94	18	251	262	2.13e-55	178	452
NV2g016479000.1	NV2t016479001.1	XP_022800544.1	38.847	465	1197	603	29	129	650	54.3	238	1322	2037	63	53	212	1391	2025	0	777	2006
NV2g016526000.1	NV2t016526001.1	XP_022796204.1	47.883	147	307	113	5	47	189	61.56	8	309	309	98	98	6	270	285	3.92e-93	278	710
NV2g016529000.1	NV2t016529001.1	XP_022802098.1	64.677	130	201	66	2	5	159	79.1	13	213	215	93	93	11	206	224	9.03e-87	256	653
NV2g016585000.1	NV2t016585001.1	XP_022794869.1	38.843	47	121	72	1	2	74	61.16	9	129	197	61	61	14	132	136	4.96e-24	92.4	228
NV2g016606000.1	NV2t016606001.1	XP_022794246.1	60.664	128	211	74	4	9	153	72.51	5	209	209	98	98	7	214	216	9e-82	242	618
NV2g016632000.1	NV2t016632001.1	XP_022802411.1	61.19	257	420	153	3	10	338	80.48	121	538	539	78	78	66	477	478	0	595	1533
NV2g016703000.1	NV2t016703001.1	XP_022802065.1	62.614	206	329	123	0	0	265	80.55	9	337	344	96	96	8	336	564	5.01e-154	444	1142
NV2g016941000.1	NV2t016941001.1	XP_022799858.1	58.115	222	382	124	4	36	278	72.77	596	974	974	83	39	501	849	849	2.16e-145	454	1167
NV2g016972000.1	NV2t016972002.1	XP_022808214.1	60.204	295	490	186	4	9	379	77.35	11	491	491	98	98	4	493	493	0	641	1653
NV2g017002000.1	NV2t017002001.1	XP_022800516.1	66.516	147	221	74	0	0	181	81.9	733	953	1152	43	19	997	1217	1500	5.33e-102	353	907
NV2g017003000.1	NV2t017003001.1	XP_022800522.1	41.667	135	324	142	9	47	188	58.02	44	345	348	87	87	53	351	354	1.75e-55	185	469
NV2g017121000.1	NV2t017121001.1	XP_022790752.1	67.262	226	336	109	1	1	270	80.36	32	366	370	91	91	36	371	373	2.76e-175	492	1267
NV2g017169000.1	NV2t017169001.1	XP_022793067.1	50.046	546	1091	444	25	101	709	64.99	5	1057	1067	99	99	6	1033	1040	0	1001	2589
NV2g017394000.1	NV2t017394001.1	XP_022781806.1	29.53	88	298	175	13	35	139	46.64	2	287	291	98	98	6	280	281	4.42e-24	99	245
NV2g017396000.1	NV2t017396001.1	XP_022781800.1	44.737	170	380	196	6	14	233	61.32	332	704	709	53	53	539	911	914	2.58e-106	345	884
NV2g017402000.1	NV2t017402001.1	XP_022781686.1	57.143	52	91	38	1	1	75	82.42	371	461	461	20	20	686	775	775	1.5e-26	113	283
NV2g017517000.1	NV2t017517001.1	XP_022796619.1	44.889	101	225	120	2	4	145	64.44	493	715	729	56	31	737	959	959	1.18e-60	220	561
NV2g017614000.1	NV2t017614003.1	XP_022781979.1	48.689	130	267	130	4	7	179	67.04	68	332	336	79	79	726	987	997	5.43e-81	265	678
NV2g017669000.1	NV2t017669001.1	XP_022799108.1	38.921	332	853	493	6	28	504	59.09	3	843	877	96	96	14	850	884	0	632	1630
NV2g017723000.1	NV2t017723001.1	XP_022785697.1	66.107	197	298	101	0	0	248	83.22	2	299	299	99	99	1	298	298	4.93e-148	417	1072
NV2g017756000.1	NV2t017756001.1	XP_022780590.1	47.195	244	517	264	1	9	338	65.38	45	552	589	86	86	35	551	553	5e-180	520	1339
NV2g017826000.1	NV2t017826001.1	XP_022796633.1	64.929	137	211	71	1	3	169	80.09	656	863	886	54	23	624	834	841	5.35e-87	296	757
NV2g017827000.1	NV2t017827003.1	XP_022796627.1	52.381	99	189	86	2	4	138	73.02	659	846	850	64	22	525	710	713	1.51e-65	233	594
NV2g017877000.1	NV2t017877001.1	XP_022789364.1	63.222	208	329	95	9	26	239	72.64	1	310	310	100	100	1	322	322	2.74e-138	394	1012
NV2g017887000.1	NV2t017887001.1	XP_022797012.1	55.799	255	457	195	4	7	342	74.84	17	467	488	92	92	6	461	462	0	536	1381
NV2g018023000.1	NV2t018023001.1	XP_022780041.1	65.526	766	1169	378	12	25	944	80.75	47	1200	1208	96	96	1	1159	1160	0	1580	4091
NV2g018052000.1	NV2t018052001.1	XP_022790872.1	70.037	374	534	160	0	0	445	83.33	30	563	1124	75	48	46	579	1074	0	838	2165
NV2g018067000.1	NV2t018067001.1	XP_022790852.1	51.304	472	920	409	10	39	605	65.76	10	895	895	99	99	11	925	925	0	909	2348
NV2g018077000.1	NV2t018077001.1	XP_022789330.1	40.634	269	662	305	17	88	370	55.89	63	645	666	91	88	41	693	777	2.55e-150	454	1169
NV2g018119000.1	NV2t018119001.1	XP_022792980.1	56.548	190	336	138	4	8	246	73.21	6	336	336	99	99	7	339	339	2.43e-138	396	1017
NV2g018171000.1	NV2t018171001.1	XP_022783049.1	32.328	150	464	277	14	37	221	47.63	7	453	454	98	98	46	489	491	2.44e-64	215	548
NV2g018176000.1	NV2t018176001.1	XP_022784961.1	38.961	90	231	103	9	38	123	53.25	1	210	523	40	40	74	287	1678	1.13e-32	133	335
NV2g018299000.1	NV2t018299001.1	XP_022797175.1	59.907	514	858	299	13	45	641	74.71	13	850	850	99	99	26	858	860	0	992	2565
NV2g018344000.1	NV2t018344001.1	XP_022779080.1	54.396	99	182	79	1	4	121	66.48	1	182	497	64	37	1	178	966	1.2e-61	217	553
NV2g018394000.1	NV2t018394005.1	XP_022783654.1	54.93	117	213	96	0	0	160	75.12	127	339	343	62	62	106	318	321	8.36e-92	277	708
NV2g018430000.1	NV2t018430001.1	XP_022785653.1	63.956	291	455	142	4	22	345	75.82	5	451	451	99	99	62	502	503	0	585	1507
NV2g018480000.1	NV2t018480001.1	XP_022779382.1	53.279	260	488	219	5	9	349	71.52	297	780	1025	97	47	1	483	499	8.52e-179	530	1365
NV2g018482000.1	NV2t018482001.1	XP_022779440.1	58.704	145	247	83	7	19	182	73.68	1	234	234	100	100	1	241	241	1.28e-91	269	688
NV2g018488000.1	NV2t018488001.1	XP_022779057.1	46.078	141	306	146	7	19	190	62.09	321	624	627	48	48	44	332	341	3.21e-84	268	684
NV2g018533000.1	NV2t018533001.1	XP_022806631.1	56.33	307	545	223	8	15	398	73.03	23	561	591	91	91	46	581	605	0	624	1609
NV2g018535000.1	NV2t018535001.1	XP_022805703.1	51.648	188	364	121	8	55	234	64.29	1	325	330	98	98	1	348	348	4.78e-118	344	883
NV2g018560000.1	NV2t018560001.1	XP_022782319.1	41.931	317	756	427	7	12	452	59.79	1	750	750	100	100	1	750	750	0	601	1550
NV2g018584000.1	NV2t018584001.1	XP_022800080.1	65.775	123	187	62	2	2	146	78.07	11	195	554	33	33	99	285	422	3.73e-84	268	685
NV2g018585000.1	NV2t018585001.1	XP_022800114.1	43.213	191	442	215	7	36	270	61.09	235	647	687	60	60	249	683	730	9.48e-121	377	968
NV2g018609000.1	NV2t018609001.1	XP_022781808.1	66.99	207	309	101	1	1	249	80.58	1	308	308	100	100	166	474	475	4.92e-142	409	1051
NV2g018639000.1	NV2t018639001.1	XP_022790853.1	71.225	250	351	90	2	11	296	84.33	6	345	355	96	96	1	351	360	2.61e-178	499	1284
NV2g018751000.1	NV2t018751001.1	XP_022790461.1	56.674	242	427	179	3	6	318	74.47	1	423	423	100	100	1234	1658	1673	3.19e-175	532	1371
NV2g018752000.1	NV2t018752001.1	XP_022782212.1	27.902	411	1473	881	45	181	693	47.05	2	1363	1402	97	97	49	1451	1491	1.32e-159	520	1339
NV2g018783000.1	NV2t018783002.1	XP_022790471.1	77.308	402	520	96	3	22	441	84.81	12	516	538	94	94	7	519	519	0	819	2115
NV2g018784000.1	NV2t018784001.1	XP_022804885.1	33.08	218	659	388	19	53	323	49.01	20	639	822	75	75	12	656	754	5.12e-87	292	748
NV2g018792000.1	NV2t018792002.1	XP_022784667.1	55.142	252	457	190	5	15	318	69.58	13	468	492	93	93	36	478	505	6e-174	499	1284
NV2g018831000.1	NV2t018831001.1	XP_022781943.1	40.517	141	348	169	12	38	190	54.6	1	318	323	98	98	1	340	354	2.54e-60	197	500
NV2g018846000.1	NV2t018846001.1	XP_022779074.1	60.58	209	345	119	3	17	259	75.07	1	333	333	100	100	3	342	342	2.05e-157	444	1142
NV2g018856000.1	NV2t018856001.1	XP_022805062.1	73.515	458	623	147	15	18	513	82.34	1	614	614	100	100	1	614	614	0	870	2248
NV2g018912000.1	NV2t018912001.1	XP_022786344.1	41.216	61	148	83	2	4	87	58.78	4	151	154	96	96	3	146	150	5.64e-35	119	298
NV2g018954000.1	NV2t018954001.1	XP_022785880.1	43.729	129	295	87	9	79	149	50.51	6	238	238	98	98	5	282	282	5.44e-57	182	463
NV2g019110000.1	NV2t019110001.1	XP_022801470.1	44.011	158	359	190	7	11	219	61	54	404	410	86	86	34	389	394	1.56e-94	289	739
NV2g019340000.1	NV2t019340013.1	XP_022803298.1	59.509	97	163	59	3	7	122	74.85	34	195	195	83	83	1	157	157	2.97e-59	182	463
NV2g019366000.1	NV2t019366001.1	XP_022800811.1	51.803	158	305	137	4	10	218	71.48	9	308	467	64	64	3	302	444	4.93e-108	327	839
NV2g019432000.1	NV2t019432001.1	XP_022778244.1	29.767	128	430	259	15	43	210	48.84	5	422	430	97	97	13	411	422	8.56e-48	169	428
NV2g019508000.1	NV2t019508001.1	XP_022788007.1	49.905	262	525	261	2	2	366	69.71	30	553	557	94	94	32	555	569	0	579	1492
NV2g019509000.1	NV2t019509002.1	XP_022788002.1	57.791	293	507	202	6	12	372	73.37	16	515	520	96	96	14	515	521	0	610	1573
NV2g019556000.1	NV2t019556001.1	XP_022800412.1	46.004	213	463	235	5	15	293	63.28	109	556	563	80	80	75	537	539	8.77e-131	392	1008
NV2g019727000.1	NV2t019727001.1	XP_022790981.1	44.04	133	302	138	9	31	174	57.62	13	293	293	96	96	1	292	293	7.47e-71	221	562
NV2g019739000.1	NV2t019739002.1	XP_022809280.1	27.232	61	224	134	5	29	103	45.98	27	241	242	89	89	120	323	324	4.66e-17	79	193
NV2g019753000.1	NV2t019753001.1	XP_022798422.1	48.905	67	137	70	0	0	94	68.61	23	159	162	85	85	26	162	167	1.88e-42	139	350
NV2g019758000.1	NV2t019758001.1	XP_022791145.1	60.886	165	271	105	1	1	212	78.23	2	271	271	99	99	10	280	280	1.76e-124	355	912
NV2g019770000.1	NV2t019770001.1	XP_022787151.1	44.271	85	192	98	4	9	125	65.1	37	220	221	83	83	11	201	203	6.11e-55	174	441
NV2g020036000.1	NV2t020036001.1	XP_022808298.1	50.394	256	508	242	5	10	325	63.98	22	527	528	96	96	21	520	526	1.77e-177	510	1313
NV2g020119000.1	NV2t020119001.1	XP_022800456.1	63.163	631	999	362	4	6	776	77.68	1	997	1022	98	98	1	995	1016	0	1309	3387
NV2g020240000.1	NV2t020240001.1	XP_022783301.1	68.91	297	431	130	2	4	360	83.53	53	479	480	89	89	53	483	485	0	657	1696
NV2g020267000.1	NV2t020267001.1	XP_022794368.1	50.392	257	510	185	6	68	350	68.63	437	946	952	84	54	3	444	446	9.36e-179	525	1353
NV2g020322000.1	NV2t020322001.1	XP_022807681.1	40.86	152	372	212	3	8	214	57.53	37	405	439	87	84	25	391	391	1.07e-103	313	803
NV2g020325000.1	NV2t020325001.1	XP_022807676.1	35.938	46	128	77	2	5	65	50.78	26	148	522	24	24	3	130	538	2.57e-20	94.4	233
NV2g020419000.1	NV2t020419001.1	XP_022792414.1	53.205	83	156	73	0	0	122	78.21	1	156	183	85	85	1	156	161	1.05e-57	178	452
NV2g020460000.1	NV2t020460001.1	XP_022810366.1	41.385	526	1271	610	28	135	746	58.69	1	1160	3063	59	38	266	1512	3887	0	798	2060
NV2g020520000.1	NV2t020520002.1	XP_022808300.1	46.538	242	520	241	9	37	324	62.31	27	521	523	95	95	16	523	526	6.48e-160	465	1197
NV2g020636000.1	NV2t020636001.1	XP_022782280.1	56.522	247	437	185	4	5	313	71.62	48	482	482	90	90	36	469	469	0	520	1339
NV2g020737000.1	NV2t020737001.1	XP_022803498.1	69.611	197	283	83	1	3	243	85.87	130	409	446	63	63	1	283	293	6.55e-160	453	1166
NV2g020815000.1	NV2t020815001.1	XP_022786216.1	65.568	179	273	92	2	2	215	78.75	28	300	305	90	90	26	296	296	2.02e-130	373	957
NV2g020819000.1	NV2t020819001.1	XP_022784712.1	29.905	503	1682	1006	39	173	789	46.91	10	1624	1633	99	99	686	2261	2308	0	659	1699
NV2g020838000.1	NV2t020838001.1	XP_022785645.1	54.902	84	153	64	1	5	110	71.9	2	149	169	88	88	72	224	234	7.61e-60	186	471
NV2g020849000.1	NV2t020849001.1	XP_022777465.1	34.109	88	258	125	9	45	134	51.94	1	240	240	100	100	1	231	231	3.71e-35	125	314
NV2g020884000.1	NV2t020884001.1	XP_022782276.1	54.724	139	254	95	7	20	162	63.78	18	252	252	93	93	19	271	271	1.1e-74	228	581
NV2g020952000.1	NV2t020952001.1	XP_022808422.1	35.019	90	257	156	5	11	144	56.03	24	275	290	87	87	8	258	259	8.51e-46	155	392
NV2g021053000.1	NV2t021053001.1	XP_022787201.1	62.094	172	277	102	1	3	221	79.78	169	442	442	62	62	1	277	277	9.29e-126	365	938
NV2g021109000.1	NV2t021109001.1	XP_022779444.1	53.023	114	215	97	1	4	154	71.63	1	215	228	94	94	1	211	216	4.45e-81	241	616
NV2g021183000.1	NV2t021183001.1	XP_022796171.1	50.974	157	308	123	12	28	195	63.31	13	300	308	94	94	9	308	318	2.91e-77	238	608
NV2g021271000.1	NV2t021271001.1	XP_022796188.1	37.746	211	559	281	11	67	303	54.2	51	556	566	89	89	68	612	620	2.39e-122	374	959
NV2g021330000.1	NV2t021330002.1	XP_022801119.1	49.618	130	262	131	1	1	169	64.5	21	281	293	89	89	2	263	263	2.4e-86	259	662
NV2g021413000.1	NV2t021413001.1	XP_022804170.1	36.104	278	770	405	20	87	389	50.52	156	871	905	87	79	189	925	941	1.6e-128	410	1054
NV2g021461000.1	NV2t021461003.1	XP_022779114.1	57.002	232	407	146	14	29	285	70.02	1	396	412	96	96	1	389	397	2.03e-142	411	1057
NV2g021537000.1	NV2t021537001.1	XP_022791205.1	32.721	89	272	174	4	9	153	56.25	22	284	286	92	92	96	367	367	2.67e-40	144	362
NV2g021577000.1	NV2t021577001.1	XP_022796157.1	35.391	172	486	289	11	25	277	57	2306	2772	2824	30	17	424	903	903	3.47e-91	319	818
NV2g021578000.1	NV2t021578001.1	XP_022796156.1	41.914	127	303	160	8	16	182	60.07	346	636	639	78	46	293	591	592	8.9e-72	243	619
NV2g021582000.1	NV2t021582001.1	XP_022798055.1	67.368	128	190	60	2	2	150	78.95	14	202	202	94	94	11	199	199	2.87e-83	245	626
NV2g021600000.1	NV2t021600001.1	XP_022792524.1	70.079	89	127	38	0	0	108	85.04	1	127	127	100	100	1	127	127	1.33e-63	190	482
NV2g021939000.1	NV2t021939001.1	XP_022793201.1	60.736	99	163	64	0	0	135	82.82	1	163	163	100	100	1	163	163	5.47e-76	224	570
NV2g021976000.1	NV2t021976003.1	XP_022793216.1	67.717	172	254	82	0	0	208	81.89	1	254	254	100	100	237	490	494	7.29e-124	361	927
NV2g021990000.1	NV2t021990001.1	XP_022783541.1	46.374	243	524	203	8	78	317	60.5	120	623	623	81	81	41	506	506	4.11e-156	458	1179
NV2g022056000.1	NV2t022056001.1	XP_022792701.1	35.493	126	355	182	8	47	176	49.58	1	324	328	99	99	1	339	345	4.92e-63	203	517
NV2g022091000.1	NV2t022091001.1	XP_022791964.1	29.268	96	328	199	8	33	148	45.12	38	358	732	44	44	128	429	647	6.78e-27	116	291
NV2g022126000.1	NV2t022126001.1	XP_022788668.1	70.229	368	524	142	4	14	436	83.21	1	513	513	100	100	1	521	521	0	759	1960
NV2g022131000.1	NV2t022131001.1	XP_022797316.1	33.831	68	201	109	2	24	108	53.73	54	230	233	76	76	176	376	379	2.57e-35	129	323
NV2g022155000.1	NV2t022155002.1	XP_022798430.1	51.584	863	1673	729	20	81	1136	67.9	418	2047	2064	79	79	577	2211	2225	0	1770	4584
NV2g022228000.1	NV2t022228001.1	XP_022779122.1	75.143	393	523	112	4	18	438	83.75	4	524	524	99	99	4	510	510	0	802	2071
NV2g022291000.1	NV2t022291001.1	XP_022798251.1	56.629	645	1139	467	8	27	819	71.91	1	1120	1120	100	100	1	1131	1131	0	1267	3279
NV2g022296000.1	NV2t022296001.1	XP_022808791.1	57.788	256	443	177	6	10	325	73.36	107	544	682	64	64	471	908	929	0	553	1425
NV2g022451000.1	NV2t022451001.1	XP_022788954.1	40.549	133	328	164	7	31	192	58.54	20	347	348	94	94	4	300	300	9.2e-66	210	534
NV2g022454000.1	NV2t022454001.1	XP_022788894.1	55.654	251	451	138	9	62	299	66.3	1	411	415	99	99	1	429	431	1.08e-162	464	1195
NV2g022490000.1	NV2t022490001.1	XP_022788911.1	60.784	155	255	100	0	0	198	77.65	18	272	273	93	93	1	255	255	7.52e-120	343	880
NV2g022507000.1	NV2t022507001.1	XP_022805275.1	71.622	159	222	58	3	5	192	86.49	1	220	232	95	95	1	219	417	2.87e-114	333	854
NV2g022650000.1	NV2t022650001.1	XP_022792993.1	57.5	23	40	17	0	0	32	80	21	60	483	8	8	157	196	683	3.52e-08	56.2	134
NV2g022721000.1	NV2t022721001.1	XP_022801132.1	70.96	303	427	103	7	21	339	79.39	15	435	435	97	97	18	429	429	0	592	1526
NV2g022740000.1	NV2t022740002.1	XP_022779186.1	43.675	145	332	159	12	28	205	61.75	9	332	333	97	97	9	320	329	4.11e-89	270	690
NV2g022756000.1	NV2t022756001.1	XP_022792981.1	57.671	421	730	275	6	34	522	71.51	12	713	728	96	96	11	734	735	0	869	2245
NV2g022835000.1	NV2t022835001.1	XP_022789103.1	53.684	51	95	35	3	9	65	68.42	87	177	177	51	51	85	174	174	3.46e-26	98.6	244
NV2g022943000.1	NV2t022943001.1	XP_022784864.1	79.149	558	705	133	5	14	630	89.36	1	693	704	98	98	1	703	709	0	1146	2965
NV2g022943000.1	NV2t022943002.1	XP_022784865.1	80.316	559	696	122	6	15	628	90.23	1	683	694	98	98	1	694	700	0	1147	2967
NV2g023081000.1	NV2t023081001.1	XP_022800937.1	37.209	160	430	259	5	11	255	59.3	71	493	494	86	86	96	521	522	1.83e-102	317	811
NV2g023095000.1	NV2t023095001.1	XP_022779792.1	69.231	144	208	62	1	2	170	81.73	1	208	209	99	99	1	206	207	5.66e-106	303	777
NV2g023131000.1	NV2t023131001.1	XP_022780365.1	51.883	124	239	104	3	11	155	64.85	30	257	257	89	89	6	244	244	1.17e-76	232	592
NV2g023185000.1	NV2t023185002.1	XP_022789019.1	57.773	275	476	180	3	21	341	71.64	1	465	479	97	97	2	467	485	0	554	1427
NV2g023247000.1	NV2t023247002.1	XP_022808266.1	68.715	246	358	109	2	3	299	83.52	1	357	365	98	98	1	356	356	0	530	1365
NV2g023248000.1	NV2t023248001.1	XP_022796338.1	62.103	254	409	129	7	26	298	72.86	5	405	438	92	92	6	396	431	2.32e-161	462	1188
NV2g023451000.1	NV2t023451001.1	XP_022787076.1	70.557	532	754	222	0	0	630	83.55	1	754	754	100	100	1	754	754	0	1144	2959
NV2g023471000.1	NV2t023471001.1	XP_022785437.1	55.469	284	512	214	9	14	368	71.88	1	504	504	100	100	55	560	564	0	556	1433
NV2g023613000.1	NV2t023613001.1	XP_022785006.1	66.141	545	824	226	12	53	613	74.39	38	851	875	93	93	38	818	834	0	1066	2756
NV2g023619000.1	NV2t023619001.1	XP_022799523.1	57.358	152	265	113	0	0	193	72.83	1	265	268	99	99	23	287	289	6.88e-112	324	830
NV2g023668000.1	NV2t023668001.1	XP_022783847.1	67.337	134	199	65	0	0	159	79.9	2	200	201	99	99	1	199	201	2.3e-98	283	725
NV2g023839000.1	NV2t023839001.1	XP_022784892.1	71.038	390	549	136	5	23	449	81.79	1	526	526	100	100	1	549	549	0	797	2059
NV2g023846000.1	NV2t023846001.1	XP_022791331.1	49.815	269	540	241	8	30	348	64.44	36	563	568	93	93	45	566	567	0	532	1370
NV2g023951000.1	NV2t023951001.1	XP_022794178.1	57.812	148	256	101	4	7	191	74.61	16	271	271	94	94	1	249	249	5.22e-106	308	788
NV2g024161000.1	NV2t024161001.1	XP_022781908.1	68.265	299	438	132	4	7	351	80.14	23	457	457	95	95	5	438	438	0	604	1557
NV2g024302000.1	NV2t024302001.1	XP_022780441.1	51.667	279	540	228	8	33	377	69.81	1	509	512	99	99	1	538	540	0	556	1432
NV2g024307000.1	NV2t024307001.1	XP_022803388.1	43.446	116	267	132	6	19	162	60.67	1	258	548	47	47	1	257	599	1.11e-57	202	515
NV2g024308000.1	NV2t024308001.1	XP_022803398.1	44.382	79	178	82	3	17	111	62.36	1	170	177	96	96	1	169	184	1.46e-48	155	393
NV2g024332000.1	NV2t024332001.1	XP_022790143.1	57.878	180	311	129	1	2	235	75.56	65	375	376	83	83	126	434	438	4.75e-137	398	1022
NV2g024334000.1	NV2t024334001.1	XP_022790138.1	40.07	228	569	245	15	96	315	55.36	226	773	789	69	69	692	1185	1196	1.4e-120	391	1005
NV2g024348000.1	NV2t024348001.1	XP_022790177.1	39.586	268	677	330	13	79	368	54.36	73	686	1997	72	31	21	681	1375	2.71e-116	404	1038
NV2g024359000.1	NV2t024359002.1	XP_022790151.1	38.641	182	471	208	13	81	234	49.68	1	436	506	99	86	812	1236	1261	4.69e-68	237	605
NV2g024360000.1	NV2t024360001.1	XP_022790154.1	44.254	181	409	198	10	30	240	58.68	7	412	1289	75	31	7	388	1180	8.52e-98	340	871
NV2g024363000.1	NV2t024363001.1	XP_022790188.1	30.035	85	283	151	2	47	131	46.29	742	1024	1039	27	27	168	403	407	2.43e-19	92	227
NV2g024375000.1	NV2t024375002.1	XP_022793353.1	59.404	976	1643	630	15	37	1135	69.08	1	1632	1632	100	100	1	1617	1617	0	1155	2987
NV2g024631000.1	NV2t024631001.1	XP_022795263.1	38.287	219	572	338	7	15	333	58.22	27	585	587	95	95	24	593	597	6.61e-135	406	1043
NV2g024666000.1	NV2t024666001.1	XP_022786453.1	70.833	204	288	83	1	1	242	84.03	34	321	323	89	89	1	287	288	3.55e-151	426	1094
NV2g024780000.1	NV2t024780001.1	XP_022794309.1	64.583	124	192	64	3	4	156	81.25	1	190	190	100	100	1	190	190	8.45e-91	263	673
NV2g024826000.1	NV2t024826002.1	XP_022809884.1	57.595	91	158	66	1	1	129	81.65	33	189	193	81	81	1	158	165	6.33e-70	210	534
NV2g024850000.1	NV2t024850003.1	XP_022789635.1	42.922	188	438	237	7	13	276	63.01	31	463	463	94	94	34	463	463	4.8e-125	372	954
NV2g024893000.1	NV2t024893001.1	XP_022783830.1	24.346	93	382	194	11	95	142	37.17	14	324	334	93	93	14	371	410	1.34e-20	92	227
NV2g024951000.1	NV2t024951003.1	XP_022796796.1	58.859	392	666	204	7	70	479	71.92	19	639	639	97	97	23	663	667	0	759	1959
NV2g025130000.1	NV2t025130001.1	XP_022783793.1	46.377	256	552	270	12	26	344	62.32	26	562	591	91	91	25	565	624	8.76e-166	486	1251
NV2g025184000.1	NV2t025184001.1	XP_022796798.1	60.169	926	1539	562	20	51	1154	74.98	17	1517	1519	99	99	11	1536	1537	0	1930	4999
NV2g025253000.1	NV2t025253001.1	XP_022806517.1	44.286	248	560	291	7	21	348	62.14	2	551	565	97	97	107	655	675	2.74e-166	488	1257
NV2g025327000.1	NV2t025327001.1	XP_022789660.1	61.163	263	430	142	9	25	321	74.65	207	623	623	67	67	834	1251	1251	1.38e-170	519	1336
NV2g025338000.1	NV2t025338001.1	XP_022783752.1	52.632	130	247	113	3	4	176	71.26	31	274	1212	20	20	32	277	1307	8.54e-76	275	704
NV2g025410000.1	NV2t025410001.1	XP_022790565.1	42.529	185	435	180	14	70	242	55.63	1	404	406	99	99	1	396	398	6.86e-95	290	742
NV2g025428000.1	NV2t025428001.1	XP_022797180.1	54.468	256	470	198	7	16	330	70.21	1	462	467	99	99	18	479	485	0	524	1349
NV2g025537000.1	NV2t025537001.1	XP_022787578.1	60.158	228	379	138	4	13	286	75.46	11	376	376	97	97	13	391	391	1.69e-176	496	1277
NV2g025612000.1	NV2t025612001.1	XP_022787895.1	54.064	153	283	124	2	6	206	72.79	64	340	340	81	81	54	336	343	4.95e-111	327	837
NV2g025707000.1	NV2t025707001.1	XP_022794321.1	37.426	189	505	247	9	69	301	59.6	1568	2006	2850	33	15	1	502	1286	5.4e-77	283	724
NV2g025991000.1	NV2t025991001.1	XP_022800136.1	59.259	64	108	44	0	0	83	76.85	22	129	130	83	83	24	131	246	1.98e-43	142	359

## Sheet: Xenia
gene_id	query_id	subject_id	perc_identity	num_ident_matches	alig_length	mismatches	gap_openings	n_gaps	pos_match	ppos	q_start	q_end	q_len	qcov	qcovhsp	s_start	s_end	s_len	evalue	bit_score	score_raw
NV2g000118000.1	NV2t000118001.1	XP_046843778.1	50.683	334	659	301	7	24	421	63.88	2	650	654	99	99	31	675	675	0	687	1774
NV2g000119000.1	NV2t000119001.1	XP_046843797.1	39.723	172	433	219	11	42	259	59.82	43	467	492	86	86	1	399	435	5.14e-101	310	793
NV2g000131000.1	NV2t000131001.1	XP_046852175.1	42.194	100	237	135	2	2	153	64.56	26	260	260	90	90	24	260	260	4.18e-65	203	517
NV2g000273000.1	NV2t000273001.1	XP_046840377.1	53.5	214	400	179	3	7	286	71.5	17	410	410	96	96	20	418	418	1.58e-154	442	1138
NV2g000295000.1	NV2t000295001.1	XP_046843853.1	50.161	312	622	270	12	40	395	63.5	28	639	651	94	94	12	603	611	0	567	1461
NV2g000675000.1	NV2t000675002.1	XP_046839380.1	48.423	307	634	268	10	59	406	64.04	54	684	688	92	92	43	620	627	0	595	1535
NV2g000676000.1	NV2t000676001.1	XP_046846316.1	64.96	241	371	127	2	3	293	78.98	103	471	541	68	68	77	446	557	0	530	1365
NV2g000767000.1	NV2t000767001.1	XP_046840417.1	31.783	41	129	78	4	10	73	56.59	32	153	185	66	66	16	141	162	7.64e-18	76.3	186
NV2g000918000.1	NV2t000918002.1	XP_046855413.1	45.299	212	468	239	8	17	303	64.74	142	604	844	70	55	97	552	675	2.83e-129	402	1033
NV2g000919000.1	NV2t000919004.1	XP_046840056.1	38.852	176	453	225	9	52	254	56.07	25	428	451	90	90	8	457	475	2.11e-107	326	835
NV2g000931000.1	NV2t000931001.1	XP_046862612.1	42.52	162	381	216	3	3	253	66.4	53	431	596	64	64	30	409	497	1.21e-107	332	852
NV2g000949000.1	NV2t000949001.1	XP_046843526.1	31.673	178	562	347	8	37	287	51.07	25	585	589	95	95	8	533	536	7.23e-89	285	728
NV2g001170000.1	NV2t001170001.1	XP_046841099.1	52.105	99	190	87	3	4	119	62.63	201	388	449	43	42	17	204	291	3.91e-52	177	448
NV2g001389000.1	NV2t001389001.1	XP_046841600.1	61.204	183	299	113	1	3	233	77.93	10	305	309	96	96	11	309	310	3.06e-133	380	976
NV2g001823000.1	NV2t001823001.1	XP_046858683.1	46.667	70	150	80	0	0	100	66.67	95	244	307	49	49	2	151	173	1.05e-40	139	351
NV2g001824000.1	NV2t001824001.1	XP_046850219.1	44.479	286	643	275	10	82	379	58.94	4	643	643	99	99	3	566	566	0	535	1378
NV2g002533000.1	NV2t002533001.1	XP_046852398.1	47.101	65	138	69	1	4	86	62.32	4	137	363	37	37	7	144	350	1.52e-41	148	374
NV2g002652000.1	NV2t002652001.1	XP_046862920.1	46.667	133	285	141	4	11	191	67.02	9	283	302	91	91	26	309	327	3.37e-76	235	600
NV2g002739000.1	NV2t002739003.1	XP_046858590.1	36.596	172	470	285	3	13	266	56.6	6	464	486	94	94	3	470	487	3.18e-110	335	859
NV2g002801000.1	NV2t002801001.1	XP_046841779.1	34.515	146	423	212	14	65	193	45.63	498	867	1261	62	29	119	529	1704	2.68e-49	192	488
NV2g002966000.1	NV2t002966004.1	XP_046854457.1	69.578	231	332	88	6	13	259	78.01	1	320	320	100	100	1	331	331	9.16e-155	436	1121
NV2g003098000.1	NV2t003098001.1	XP_046852638.1	56	420	750	308	10	22	547	72.93	26	769	773	96	96	5	738	738	0	857	2213
NV2g003135000.1	NV2t003135001.1	XP_046852342.1	63.131	250	396	140	2	6	305	77.02	58	451	495	80	80	17	408	604	0	538	1385
NV2g003330000.1	NV2t003330002.1	XP_046853520.1	36.097	209	579	332	7	38	309	53.37	90	637	638	86	86	53	624	624	2.35e-111	347	891
NV2g003341000.1	NV2t003341001.1	XP_046853795.1	41.641	137	329	184	5	8	197	59.88	55	379	379	86	86	5	329	329	4.04e-89	271	694
NV2g003485000.1	NV2t003485001.1	XP_046852353.1	38.251	280	732	425	9	27	440	60.11	3	728	728	99	99	2	712	712	0	555	1429
NV2g003555000.1	NV2t003555001.1	XP_046852750.1	35	49	140	76	5	15	74	52.86	49	185	859	16	16	57	184	481	2.13e-13	73.6	179
NV2g003783000.1	NV2t003783002.1	XP_046853917.1	52.847	232	439	168	5	39	307	69.93	269	672	760	83	53	650	1084	1119	1.42e-147	460	1183
NV2g004006000.1	NV2t004006001.1	XP_046842667.1	43.109	147	341	148	9	46	187	54.84	74	397	397	82	82	72	383	383	2.99e-79	249	635
NV2g004067000.1	NV2t004067001.1	XP_046842032.1	31.804	409	1286	804	20	73	669	52.02	260	1510	1877	90	67	1239	2486	2659	0	673	1737
NV2g004218000.1	NV2t004218001.1	XP_046842858.1	57.222	206	360	152	2	2	255	70.83	21	379	681	53	53	17	375	389	5.44e-152	445	1145
NV2g004233000.1	NV2t004233001.1	XP_046843299.1	44.282	182	411	203	7	26	249	60.58	46	452	457	89	89	31	419	420	3.79e-117	349	896
NV2g004506000.1	NV2t004506001.1	XP_046843048.1	49.057	78	159	79	2	2	109	68.55	12	170	174	91	91	2	158	161	1.06e-54	170	430
NV2g004684000.1	NV2t004684001.1	XP_046843330.1	53.409	94	176	79	2	3	130	73.86	7	181	223	78	78	2	175	208	2.72e-62	193	490
NV2g005136000.1	NV2t005136001.1	XP_046842652.1	45.57	180	395	201	7	14	261	66.08	50	438	453	86	86	35	421	436	1.84e-121	361	926
NV2g005137000.1	NV2t005137001.1	XP_046842648.1	46.205	207	448	210	5	31	281	62.72	4	427	466	91	91	12	452	466	2.45e-138	405	1041
NV2g005160000.1	NV2t005160002.1	XP_046842234.1	48.642	197	405	197	7	11	265	65.43	5	403	403	99	99	4	403	412	1.31e-131	384	985
NV2g005188000.1	NV2t005188002.1	XP_046842092.1	47.603	139	292	131	5	22	185	63.36	994	1271	1271	22	22	444	727	727	6.1e-82	284	727
NV2g005194000.1	NV2t005194001.1	XP_046843113.1	47.701	83	174	84	2	7	108	62.07	57	230	235	74	74	42	208	209	9.21e-56	177	448
NV2g005199000.1	NV2t005199002.1	XP_046842095.1	75.479	197	261	61	2	3	215	82.38	6	264	264	98	98	1	260	260	1.42e-117	337	863
NV2g005200000.1	NV2t005200001.1	XP_046842093.1	81.206	229	282	46	2	7	248	87.94	12	293	295	96	96	18	292	304	5.5e-132	376	966
NV2g005499000.1	NV2t005499001.1	XP_046839174.1	46.888	226	482	246	5	10	316	65.56	2	480	498	96	96	4	478	482	3.56e-150	437	1125
NV2g005704000.1	NV2t005704001.1	XP_046859743.1	38.185	202	529	290	13	37	293	55.39	37	541	599	84	84	264	779	831	6.19e-112	353	907
NV2g005705000.1	NV2t005705002.1	XP_046839083.1	40.845	232	568	291	8	45	329	57.92	32	560	708	76	75	28	589	677	8.1e-142	430	1106
NV2g005910000.1	NV2t005910001.1	XP_046857404.1	49.534	266	537	230	9	41	340	63.31	37	557	682	94	76	22	533	574	5.36e-170	498	1283
NV2g005917000.1	NV2t005917001.1	XP_046839082.1	52.282	252	482	188	5	42	317	65.77	109	589	779	99	62	1	441	1699	1.56e-154	491	1264
NV2g005949000.1	NV2t005949001.1	XP_046859631.1	31.882	293	919	502	23	124	435	47.33	846	1746	1746	100	52	1323	2135	2135	5.72e-127	442	1136
NV2g006119000.1	NV2t006119001.1	XP_046839038.1	41.434	104	251	127	5	20	157	62.55	38	287	287	87	87	157	388	388	6.3e-51	172	435
NV2g006163000.1	NV2t006163001.1	XP_046858624.1	38.849	108	278	165	2	5	166	59.71	32	309	411	68	68	9	281	298	2.77e-67	215	548
NV2g006240000.1	NV2t006240001.1	XP_046839047.1	29.444	106	360	176	7	78	175	48.61	37	324	362	80	80	5	358	364	5.83e-48	166	419
NV2g006401000.1	NV2t006401002.1	XP_046864957.1	59.633	195	327	115	4	17	244	74.62	1	321	339	95	95	67	382	390	1.93e-130	377	969
NV2g006439000.1	NV2t006439001.1	XP_046839040.1	34.684	291	839	428	25	120	381	45.41	12	818	1524	64	53	371	1121	1202	8.47e-118	400	1028
NV2g006444000.1	NV2t006444001.1	XP_046839039.1	36.192	460	1271	656	35	155	645	50.75	56	1193	1275	89	89	1595	2843	3197	0	717	1851
NV2g006517000.1	NV2t006517001.1	XP_046841168.1	58.672	274	467	190	2	3	360	77.09	2	465	467	99	99	3	469	469	0	595	1534
NV2g006709000.1	NV2t006709001.1	XP_046859034.1	28.886	210	727	419	27	98	330	45.39	79	751	768	88	88	95	777	826	5.48e-77	265	677
NV2g006716000.1	NV2t006716003.1	XP_046863853.1	50.943	108	212	98	4	6	148	69.81	85	294	294	71	71	62	269	269	3.99e-73	225	574
NV2g006749000.1	NV2t006749003.1	XP_046859722.1	47.396	273	576	226	11	77	351	60.94	1	552	863	74	64	7	529	969	3.95e-161	495	1274
NV2g006786000.1	NV2t006786004.1	XP_046858305.1	42.13	273	648	284	25	91	362	55.86	1	593	604	98	98	1	612	612	4.23e-136	410	1053
NV2g006994000.1	NV2t006994001.1	XP_046855359.1	41.601	265	637	293	16	79	370	58.08	12	639	639	98	98	9	575	583	1.7e-152	452	1163
NV2g007009000.1	NV2t007009001.1	XP_046856372.1	34.615	153	442	279	6	10	250	56.56	3	437	437	99	99	12	450	450	3.2e-85	268	684
NV2g007733000.1	NV2t007733001.1	XP_046854828.1	50.614	412	814	360	13	42	553	67.94	6	808	808	99	99	7	789	789	0	836	2160
NV2g007788000.1	NV2t007788001.1	XP_046855191.1	30.464	92	302	176	11	34	138	45.7	12	287	328	84	84	12	305	343	9.31e-29	113	282
NV2g008302000.1	NV2t008302001.1	XP_046852856.1	39.568	55	139	73	3	11	76	54.68	4	141	141	98	98	3	131	131	4.72e-21	82.4	202
NV2g008421000.1	NV2t008421001.1	XP_046848956.1	36.187	224	619	299	19	96	300	48.47	76	626	626	88	88	1	591	591	1.31e-90	292	747
NV2g008625000.1	NV2t008625001.1	XP_046847340.1	41.989	152	362	172	9	38	216	59.67	167	525	525	68	68	54	380	380	3.16e-87	273	699
NV2g008633000.1	NV2t008633001.1	XP_046848086.1	27.734	71	256	129	5	56	105	41.02	38	241	511	40	40	826	1077	1224	6.01e-24	106	264
NV2g008660000.1	NV2t008660001.1	XP_046848953.1	45.722	716	1566	715	27	135	970	61.94	747	2289	2289	95	67	683	2136	2136	0	1227	3175
NV2g008737000.1	NV2t008737001.1	XP_046847937.1	53.731	396	737	308	9	33	509	69.06	1	725	725	100	100	1	716	720	0	783	2022
NV2g008766000.1	NV2t008766001.1	XP_046853874.1	48.919	181	370	166	8	23	249	67.3	52	414	443	82	82	43	396	398	2.72e-120	356	913
NV2g008976000.1	NV2t008976001.1	XP_046849786.1	66.746	564	845	252	11	29	655	77.51	10	844	860	97	97	6	831	832	0	1123	2906
NV2g009203000.1	NV2t009203001.1	XP_046846453.1	49.398	246	498	232	6	20	318	63.86	21	515	545	91	91	39	519	576	1.75e-160	469	1206
NV2g009507000.1	NV2t009507001.1	XP_046844845.1	53.704	58	108	50	0	0	72	66.67	37	144	552	20	20	50	157	336	7.23e-33	128	322
NV2g009511000.1	NV2t009511001.1	XP_046845533.1	45.887	608	1325	638	20	79	863	65.13	21	1316	1316	98	98	1524	2798	3343	0	1243	3215
NV2g009534000.1	NV2t009534001.1	XP_046845462.1	34.426	84	244	134	7	26	116	47.54	91	321	348	66	66	51	281	287	2.22e-28	111	278
NV2g009849000.1	NV2t009849001.1	XP_046845223.1	40.556	292	720	396	17	32	406	56.39	7	712	910	78	78	3	704	706	9.86e-176	526	1354
NV2g009872000.1	NV2t009872001.1	XP_046845317.1	34.146	28	82	48	1	6	45	54.88	1	82	579	14	14	1	76	567	5.4e-11	65.1	157
NV2g010004000.1	NV2t010004001.1	XP_046845466.1	62.559	132	211	74	1	5	159	75.36	23	233	241	88	88	9	214	219	1e-94	276	707
NV2g010006000.1	NV2t010006001.1	XP_046845467.1	68.085	128	188	55	4	5	148	78.72	4	188	193	96	96	7	192	194	1.52e-88	258	658
NV2g010077000.1	NV2t010077002.1	XP_046845216.1	53.252	131	246	105	4	10	165	67.07	15	256	312	78	78	40	279	432	1.93e-86	265	678
NV2g010107000.1	NV2t010107001.1	XP_046845677.1	78.464	419	534	114	1	1	475	88.95	87	620	670	80	80	1	533	533	0	856	2212
NV2g010271000.1	NV2t010271001.1	XP_046845688.1	65.636	191	291	99	1	1	232	79.73	5	295	302	96	96	3	292	306	2.7e-147	416	1068
NV2g010334000.1	NV2t010334001.1	XP_046845388.1	35.789	34	95	51	3	10	56	58.95	11	100	911	10	10	5	94	718	4.16e-09	60.5	145
NV2g010340000.1	NV2t010340001.1	XP_046845564.1	37.907	221	583	267	15	95	306	52.49	2	575	661	98	87	698	1194	4378	5.96e-92	313	801
NV2g010343000.1	NV2t010343001.1	XP_046845389.1	33.866	106	313	133	14	74	129	41.21	422	725	725	42	42	1396	1643	1799	1.6e-21	100	249
NV2g010387000.1	NV2t010387001.1	XP_046845577.1	42.032	393	935	514	10	28	570	60.96	10	933	1495	83	62	8	925	1733	0	794	2051
NV2g010539000.1	NV2t010539001.1	XP_046845785.1	46.76	433	926	464	12	29	610	65.87	6	922	924	99	99	4	909	909	0	863	2229
NV2g010559000.1	NV2t010559001.1	XP_046845234.1	31.844	57	179	113	4	9	102	56.98	49	221	225	77	77	26	201	209	3.09e-26	100	250
NV2g010560000.1	NV2t010560001.1	XP_046845526.1	48.598	208	428	210	7	10	287	67.06	1	427	437	98	98	819	1237	1279	8.93e-135	418	1074
NV2g010591000.1	NV2t010591001.1	XP_046854677.1	32.472	314	967	543	26	110	481	49.74	224	1160	1334	70	70	1	887	1004	9.38e-144	463	1191
NV2g010696000.1	NV2t010696003.1	XP_046846389.1	47.697	321	673	320	8	32	446	66.27	2	671	675	99	99	11	654	658	0	625	1612
NV2g010782000.1	NV2t010782001.1	XP_046846319.1	61.407	323	526	184	7	19	400	76.05	38	561	561	93	93	25	533	536	0	610	1574
NV2g010997000.1	NV2t010997001.1	XP_046861515.1	55.3	120	217	97	0	0	159	73.27	1623	1839	1839	12	12	1275	1491	1492	6.22e-77	283	723
NV2g011025000.1	NV2t011025001.1	XP_046859915.1	36.364	152	418	191	15	75	197	47.13	8	399	399	98	98	13	381	382	4.44e-58	194	492
NV2g011057000.1	NV2t011057004.1	XP_046848334.1	36.013	215	597	358	10	24	352	58.96	66	644	653	89	89	9	599	615	6.8e-125	383	983
NV2g011074000.1	NV2t011074001.1	XP_046843950.1	63.534	338	532	170	9	24	407	76.5	11	534	534	98	98	5	520	527	0	629	1623
NV2g011077000.1	NV2t011077001.1	XP_046861431.1	40.071	226	564	297	8	41	336	59.57	4	538	538	99	99	476	1027	1030	5.4e-133	412	1058
NV2g011286000.1	NV2t011286001.1	XP_046859885.1	38.86	150	386	224	6	12	237	61.4	3	380	902	42	42	1265	1646	1770	7.43e-83	292	748
NV2g011394000.1	NV2t011394001.1	XP_046846791.1	46.614	351	753	341	15	61	455	60.42	8	753	760	98	98	10	708	779	0	655	1689
NV2g011395000.1	NV2t011395001.1	XP_046846342.1	55.093	119	216	92	2	5	156	72.22	1	212	215	99	99	3	217	220	7.76e-86	253	645
NV2g011584000.1	NV2t011584001.1	XP_046862905.1	84.257	380	451	70	1	1	420	93.13	18	468	468	96	96	1	450	450	0	793	2047
NV2g011608000.1	NV2t011608001.1	XP_046860557.1	48.718	57	117	47	1	13	71	60.68	62	165	178	58	58	39	155	200	1.5e-29	107	267
NV2g011673000.1	NV2t011673001.1	XP_046840972.1	42.329	229	541	273	5	39	315	58.23	39	568	582	91	91	3	515	547	1.09e-143	426	1096
NV2g011718000.1	NV2t011718001.1	XP_046847132.1	45.714	32	70	35	1	3	41	58.57	170	236	303	22	22	338	407	552	2.99e-12	67	162
NV2g011802000.1	NV2t011802003.1	XP_046840382.1	32.249	119	369	240	5	10	207	56.1	59	425	428	86	86	50	410	421	1.93e-70	228	581
NV2g011824000.1	NV2t011824001.1	XP_046845707.1	23.937	152	635	325	19	158	240	37.8	29	612	675	87	87	35	562	710	1.12e-27	119	297
NV2g011829000.1	NV2t011829001.1	XP_046860392.1	45.289	447	987	512	15	28	618	62.61	38	1007	1007	96	96	42	1017	1017	0	866	2238
NV2g012144000.1	NV2t012144001.1	XP_046859887.1	29.829	122	409	233	12	54	211	51.59	535	900	964	38	38	166	563	624	4.46e-44	169	429
NV2g012315000.1	NV2t012315001.1	XP_046846455.1	64.417	315	489	166	3	8	382	78.12	71	551	559	86	86	2	490	497	0	666	1718
NV2g012483000.1	NV2t012483001.1	XP_046859161.1	57.062	202	354	150	2	2	264	74.58	5	358	363	98	98	22	373	373	4.8e-152	432	1112
NV2g012511000.1	NV2t012511001.1	XP_046847102.1	62.052	381	614	195	6	38	441	71.82	1	613	617	99	99	3	579	580	0	754	1946
NV2g012540000.1	NV2t012540001.1	XP_046844014.1	31.724	46	145	74	5	25	70	48.28	52	191	198	71	71	10	134	138	2.61e-13	64.3	155
NV2g012542000.1	NV2t012542001.1	XP_046843957.1	43.119	94	218	96	10	28	120	55.05	31	231	546	37	37	27	233	412	3.04e-22	99	245
NV2g012553000.1	NV2t012553001.1	XP_046859164.1	27.826	32	115	71	3	12	62	53.91	742	854	917	12	12	444	548	550	1.88e-07	54.7	130
NV2g012573000.1	NV2t012573001.1	XP_046846424.1	47.737	116	243	115	8	12	152	62.55	50	286	286	83	83	58	294	294	2.96e-65	206	523
NV2g012708000.1	NV2t012708001.1	XP_046859641.1	56.863	29	51	22	0	0	34	66.67	345	395	398	13	13	125	175	176	9.52e-15	72	175
NV2g012709000.1	NV2t012709001.1	XP_046863431.1	44.037	48	109	52	2	9	66	60.55	9	117	380	29	29	27	126	387	5.28e-18	84.7	208
NV2g012782000.1	NV2t012782001.1	XP_046860116.1	31.674	70	221	126	8	25	115	52.04	492	701	790	27	27	405	611	705	1.8e-14	77.4	189
NV2g012788000.1	NV2t012788001.1	XP_046846948.1	33.451	95	284	114	8	75	132	46.48	40	253	254	84	84	30	308	313	3.91e-40	140	353
NV2g012806000.1	NV2t012806001.1	XP_046846868.1	37.824	73	193	118	2	2	116	60.1	24	215	336	57	57	10	201	210	3.02e-41	143	360
NV2g012871000.1	NV2t012871003.1	XP_046859923.1	44.688	143	320	165	3	12	206	64.38	24	331	339	91	91	51	370	373	3.84e-96	290	741
NV2g012897000.1	NV2t012897001.1	XP_046860463.1	36.212	130	359	199	13	30	200	55.71	1	348	357	97	97	1	340	362	1.94e-56	187	476
NV2g012993000.1	NV2t012993001.1	XP_046862778.1	32.292	124	384	247	6	13	195	50.78	29	406	463	82	82	27	403	440	2.07e-66	219	558
NV2g013045000.1	NV2t013045001.1	XP_046859823.1	45.333	34	75	37	1	4	45	60	27	101	477	16	16	1	71	201	1.37e-15	75.5	184
NV2g013058000.1	NV2t013058002.1	XP_046858420.1	44.93	288	641	343	5	10	419	65.37	169	805	805	79	79	59	693	693	0	600	1547
NV2g013059000.1	NV2t013059001.1	XP_046858418.1	33.588	44	131	84	1	3	82	62.6	1186	1313	1361	9	9	1104	1234	1251	6.07e-17	87	214
NV2g013095000.1	NV2t013095001.1	XP_046850868.1	47.015	126	268	129	5	13	174	64.93	57	324	330	81	81	60	314	320	2.72e-81	249	636
NV2g013246000.1	NV2t013246001.1	XP_046850314.1	45.658	184	403	206	4	13	258	64.02	96	496	586	68	68	122	513	513	5.68e-119	362	928
NV2g013261000.1	NV2t013261001.1	XP_046850875.1	28.276	41	145	103	1	1	74	51.03	399	542	544	26	26	23	167	168	1.31e-10	60.1	144
NV2g013304000.1	NV2t013304001.1	XP_046848093.1	30.659	107	349	233	4	9	180	51.58	21	362	371	92	92	8	354	358	9.28e-47	162	411
NV2g013381000.1	NV2t013381001.1	XP_046850955.1	42.143	59	140	70	3	11	84	60	446	574	877	15	15	315	454	568	1.58e-31	130	327
NV2g013439000.1	NV2t013439001.1	XP_046846099.1	40.071	113	282	150	4	19	161	57.09	72	350	371	75	75	44	309	315	1.02e-68	218	556
NV2g013450000.1	NV2t013450001.1	XP_046863726.1	46.72	292	625	321	5	12	418	66.88	36	656	658	94	94	29	645	675	0	601	1549
NV2g013500000.1	NV2t013500001.1	XP_046859593.1	30.392	458	1507	1012	19	37	804	53.35	36	1518	1520	98	98	130	1623	1625	0	798	2062
NV2g013532000.1	NV2t013532004.1	XP_046850948.1	43.16	265	614	311	6	38	398	64.82	4	585	618	94	94	1	608	608	6.2e-180	523	1346
NV2g013804000.1	NV2t013804004.1	XP_046850664.1	75.862	352	464	110	1	2	412	88.79	4	465	480	96	96	7	470	486	0	754	1947
NV2g014005000.1	NV2t014005001.1	XP_046850830.1	45	1098	2440	1318	15	24	1481	60.7	1	2433	2433	100	100	528	2950	3404	0	2241	5806
NV2g014187000.1	NV2t014187003.1	XP_046850391.1	60.69	176	290	101	6	13	212	73.1	1	283	286	99	99	1	284	285	8.85e-125	357	916
NV2g014230000.1	NV2t014230001.1	XP_046858791.1	43.905	353	804	411	9	40	511	63.56	9	805	805	99	99	11	781	781	0	721	1861
NV2g014236000.1	NV2t014236001.1	XP_046851185.1	44.553	229	514	266	7	19	319	62.06	19	528	531	96	96	37	535	547	3.14e-153	449	1154
NV2g014428000.1	NV2t014428001.1	XP_046851055.1	44.886	158	352	187	2	7	217	61.65	35	386	574	61	61	46	390	472	2.64e-110	338	866
NV2g014440000.1	NV2t014440001.1	XP_046850843.1	56.018	377	673	259	9	37	473	70.28	1	655	664	99	99	1	654	685	0	683	1763
NV2g014459000.1	NV2t014459003.1	XP_046850439.1	57.43	143	249	91	5	15	166	66.67	27	268	282	86	86	23	263	263	2.21e-75	230	587
NV2g014511000.1	NV2t014511001.1	XP_046859138.1	34.304	106	309	174	8	29	180	58.25	99	384	407	70	70	219	521	562	1.95e-51	181	458
NV2g014549000.1	NV2t014549003.1	XP_046850086.1	48.911	247	505	241	6	17	345	68.32	26	528	530	95	95	5	494	495	1.88e-178	511	1316
NV2g014591000.1	NV2t014591001.1	XP_046858835.1	55.932	462	826	297	10	67	589	71.31	52	849	887	90	90	33	819	830	0	910	2351
NV2g014941000.1	NV2t014941002.1	XP_046859055.1	45.714	80	175	82	4	13	103	58.86	1	166	166	100	100	1	171	171	2.02e-37	126	316
NV2g015213000.1	NV2t015213001.1	XP_046851574.1	35.714	115	322	181	9	26	178	55.28	73	379	475	65	65	31	341	433	4.06e-58	197	502
NV2g015241000.1	NV2t015241001.1	XP_046851393.1	42.779	157	367	182	7	28	224	61.04	130	478	491	71	71	113	469	472	1.09e-97	302	774
NV2g015283000.1	NV2t015283001.1	XP_046857607.1	44.884	193	430	211	7	26	266	61.86	555	962	1061	38	38	6	431	438	1.53e-104	334	857
NV2g015638000.1	NV2t015638001.1	XP_046844995.1	59.763	202	338	127	4	9	252	74.56	367	702	704	88	48	511	841	842	8.84e-139	427	1099
NV2g015810000.1	NV2t015810001.1	XP_046840486.1	29.236	88	301	206	2	7	144	47.84	11	311	312	96	96	14	307	322	6.87e-41	144	364
NV2g015854000.1	NV2t015854001.1	XP_046854390.1	38.162	137	359	199	9	23	204	56.82	31	380	387	90	90	19	363	374	1.01e-77	244	623
NV2g015872000.1	NV2t015872001.1	XP_046840211.1	36.019	76	211	130	4	5	118	55.92	53	259	1090	19	19	192	401	419	3.07e-33	133	335
NV2g015937000.1	NV2t015937001.1	XP_046840542.1	41.883	129	308	156	6	23	187	60.71	139	429	494	59	59	64	365	638	1.08e-81	266	679
NV2g016007000.1	NV2t016007001.1	XP_046852324.1	47.987	286	596	295	5	15	402	67.45	13	594	614	95	95	19	613	625	0	608	1568
NV2g016021000.1	NV2t016021001.1	XP_046839742.1	53.684	306	570	252	4	12	413	72.46	1	569	569	100	100	79	637	637	0	639	1647
NV2g016033000.1	NV2t016033001.1	XP_046858163.1	35.912	65	181	110	2	6	101	55.8	55	235	301	65	60	43	217	242	1.44e-30	115	287
NV2g016097000.1	NV2t016097003.1	XP_046840298.1	60.353	376	623	239	6	8	465	74.64	21	641	664	94	94	43	659	671	0	768	1983
NV2g016318000.1	NV2t016318001.1	XP_046839046.1	29.032	81	279	172	8	26	132	47.31	105	377	762	36	36	84	342	638	3.53e-24	108	269
NV2g016334000.1	NV2t016334001.1	XP_046839409.1	49.451	180	364	138	7	46	234	64.29	48	402	503	71	71	26	352	434	5.39e-112	338	867
NV2g016360000.1	NV2t016360002.1	XP_046845923.1	33.617	79	235	122	8	34	117	49.79	503	734	744	31	31	31	234	236	1.16e-31	123	309
NV2g016526000.1	NV2t016526001.1	XP_046858204.1	31.186	92	295	160	7	43	152	51.53	20	308	309	94	94	17	274	274	2.96e-41	144	363
NV2g016941000.1	NV2t016941001.1	XP_046845265.1	33.748	190	563	293	21	80	268	47.6	106	636	974	94	55	56	570	733	3.45e-65	234	596
NV2g016972000.1	NV2t016972002.1	XP_046840896.1	54.717	261	477	207	5	9	350	73.38	21	491	491	96	96	50	523	523	0	555	1429
NV2g017002000.1	NV2t017002001.1	XP_046840577.1	34.426	105	305	180	3	20	159	52.13	687	986	1152	47	26	577	866	980	9.29e-52	198	503
NV2g017054000.1	NV2t017054001.1	XP_046840169.1	24.209	130	537	310	8	97	225	41.9	5	484	510	94	94	11	507	523	1.45e-40	153	386
NV2g017169000.1	NV2t017169001.1	XP_046840431.1	40.053	302	754	395	17	57	430	57.03	8	726	1067	83	67	10	741	984	1.12e-164	511	1316
NV2g017396000.1	NV2t017396001.1	XP_046862233.1	37.719	129	342	197	7	16	198	57.89	365	704	709	48	48	94	421	434	2.22e-72	241	615
NV2g017614000.1	NV2t017614003.1	XP_046862062.1	49.474	94	190	93	3	3	133	70	143	332	336	57	57	23	209	212	7.71e-57	183	465
NV2g017806000.1	NV2t017806001.1	XP_046850861.1	64.334	285	443	156	1	2	357	80.59	36	478	502	88	88	84	524	526	0	585	1507
NV2g017826000.1	NV2t017826001.1	XP_046851112.1	55.357	93	168	75	0	0	119	70.83	693	860	886	19	19	488	655	1271	5.8e-53	201	510
NV2g017877000.1	NV2t017877001.1	XP_046850616.1	62.587	179	286	83	6	24	202	70.63	1	274	310	88	88	1	274	281	7.13e-115	333	853
NV2g017968000.1	NV2t017968002.1	XP_046863705.1	59.685	265	444	160	4	19	324	72.97	6	441	489	89	89	4	436	467	0	526	1355
NV2g018023000.1	NV2t018023001.1	XP_046865032.1	59.159	633	1070	425	6	12	816	76.26	48	1111	1208	88	88	1	1064	1155	0	1307	3382
NV2g018052000.1	NV2t018052001.1	XP_046864028.1	62.745	320	510	188	1	2	394	77.25	28	535	1124	45	45	26	535	562	0	704	1818
NV2g018119000.1	NV2t018119001.1	XP_046862595.1	51.331	135	263	123	1	5	183	69.58	74	336	336	78	78	72	329	329	5.83e-89	270	689
NV2g018306000.1	NV2t018306002.1	XP_046850756.1	42.731	97	227	121	5	9	143	63	30	248	287	76	76	87	312	321	2.03e-60	194	493
NV2g018394000.1	NV2t018394005.1	XP_046851706.1	29.439	63	214	133	6	18	100	46.73	129	333	343	60	60	30	234	245	1.06e-24	100	249
NV2g018480000.1	NV2t018480001.1	XP_046850917.1	39.471	328	831	443	10	60	504	60.65	54	875	1025	98	80	1	780	788	0	610	1572
NV2g018482000.1	NV2t018482001.1	XP_046849922.1	53.459	85	159	47	5	27	102	64.15	1	158	234	68	68	4	136	619	9.61e-41	147	370
NV2g018584000.1	NV2t018584001.1	XP_046849921.1	45.312	87	192	88	5	17	113	58.85	10	188	554	32	32	1563	1750	1863	8.53e-44	167	423
NV2g018585000.1	NV2t018585002.1	XP_046849908.1	38.72	127	328	193	4	8	192	58.54	241	567	684	48	48	49	369	653	3.24e-82	273	698
NV2g018597000.1	NV2t018597001.1	XP_046859415.1	38.992	294	754	447	7	13	436	57.82	1	748	748	100	100	1	747	747	0	537	1384
NV2g018752000.1	NV2t018752001.1	XP_046851798.1	31.471	231	734	463	12	40	363	49.46	653	1375	1402	52	52	29	733	742	8.22e-110	364	935
NV2g018772000.1	NV2t018772002.1	XP_046850288.1	39.264	320	815	476	13	19	453	55.58	12	814	859	93	93	32	839	851	0	553	1424
NV2g018783000.1	NV2t018783003.1	XP_046851207.1	56.119	321	572	202	6	49	400	69.93	14	573	573	98	98	5	539	576	0	639	1648
NV2g018784000.1	NV2t018784001.1	XP_046839019.1	39.286	88	224	133	1	3	128	57.14	18	241	822	46	27	50	270	720	8.79e-45	172	436
NV2g018846000.1	NV2t018846001.1	XP_046850900.1	46.857	164	350	161	7	25	221	63.14	1	329	333	99	99	1	346	346	1.74e-110	325	832
NV2g018856000.1	NV2t018856001.1	XP_046851357.1	56.329	356	632	233	20	43	438	69.3	9	614	614	99	99	10	624	624	0	627	1616
NV2g018912000.1	NV2t018912001.1	XP_046839216.1	44.538	53	119	61	2	5	79	66.39	2	119	154	77	77	3	117	151	1.54e-31	110	275
NV2g018954000.1	NV2t018954001.1	XP_046850556.1	47.581	59	124	53	4	12	77	62.1	115	238	238	52	52	33	144	144	4.39e-29	106	265
NV2g019339000.1	NV2t019339001.1	XP_046847909.1	48.113	51	106	49	2	6	72	67.92	63	166	176	59	59	65	166	169	3.2e-24	92.8	229
NV2g019340000.1	NV2t019340013.1	XP_046847509.1	50.82	62	122	58	1	2	83	68.03	64	183	195	62	62	25	146	159	7.54e-26	97.4	241
NV2g019508000.1	NV2t019508001.1	XP_046849573.1	39.14	182	465	258	11	25	271	58.28	103	555	557	81	81	98	549	553	4.4e-108	334	856
NV2g019556000.1	NV2t019556001.1	XP_046859014.1	42.796	199	465	226	7	40	272	58.49	110	534	563	75	75	28	492	510	3.86e-124	374	961
NV2g019727000.1	NV2t019727001.1	XP_046848218.1	38.577	103	267	134	4	30	139	52.06	38	292	293	87	87	33	281	282	2.75e-55	180	457
NV2g019758000.1	NV2t019758001.1	XP_046847436.1	46.97	124	264	137	3	3	171	64.77	4	264	271	96	96	43	306	309	1.41e-78	240	612
NV2g020240000.1	NV2t020240001.1	XP_046847525.1	50	204	408	188	3	16	262	64.22	86	477	480	82	82	110	517	519	3.23e-146	428	1100
NV2g020815000.1	NV2t020815001.1	XP_046841486.1	56	154	275	119	2	2	202	73.45	27	300	305	90	90	3	276	276	8.41e-111	322	825
NV2g020838000.1	NV2t020838001.1	XP_046859154.1	47.853	78	163	82	3	3	108	66.26	5	167	169	96	96	78	237	241	2.67e-50	161	408
NV2g020884000.1	NV2t020884001.1	XP_046847447.1	57.831	48	83	35	0	0	57	68.67	44	126	252	33	33	47	129	224	5.18e-23	93.6	231
NV2g021053000.1	NV2t021053001.1	XP_046842254.1	32.113	114	355	226	6	15	187	52.68	78	425	442	79	79	78	424	429	5.45e-58	196	498
NV2g021183000.1	NV2t021183001.1	XP_046853581.1	40.823	129	316	130	10	57	152	48.1	1	296	308	96	96	9	287	289	5.06e-49	164	416
NV2g021330000.1	NV2t021330002.1	XP_046854484.1	34.317	93	271	154	8	24	148	54.61	19	281	293	90	90	6	260	261	2.89e-44	151	381
NV2g021461000.1	NV2t021461003.1	XP_046852570.1	43.794	187	427	196	20	44	265	62.06	1	398	412	97	97	1	412	422	2.08e-82	258	660
NV2g021578000.1	NV2t021578001.1	XP_046861491.1	34.601	91	263	155	6	17	152	57.79	388	636	639	39	39	8	267	273	7.49e-52	179	455
NV2g021582000.1	NV2t021582001.1	XP_046854493.1	44.853	61	136	68	3	7	93	68.38	45	175	202	65	65	53	186	216	6.88e-37	127	320
NV2g021600000.1	NV2t021600001.1	XP_046854537.1	31.944	46	144	75	6	23	69	47.92	1	126	127	99	99	1	139	140	2.35e-10	54.7	130
NV2g022126000.1	NV2t022126001.1	XP_046854066.1	45.736	236	516	265	4	15	339	65.7	1	502	513	98	98	3	517	1034	7.9e-151	457	1176
NV2g022228000.1	NV2t022228001.1	XP_046852069.1	67.066	336	501	150	6	15	390	77.84	32	524	524	94	94	56	549	549	0	695	1794
NV2g022291000.1	NV2t022291001.1	XP_046853965.1	38.156	422	1106	614	18	70	612	55.33	24	1116	1120	98	98	17	1065	1066	0	704	1817
NV2g022446000.1	NV2t022446001.1	XP_046863061.1	45.899	319	695	363	7	13	460	66.19	118	806	806	85	85	43	730	730	0	646	1667
NV2g022454000.1	NV2t022454001.1	XP_046853077.1	68.702	180	262	78	2	4	208	79.39	146	405	415	63	63	124	383	407	1.13e-129	379	973
NV2g022507000.1	NV2t022507001.1	XP_046853647.1	58.525	127	217	81	3	9	161	74.19	5	220	232	93	93	2	210	407	2.06e-85	259	661
NV2g022943000.1	NV2t022943003.1	XP_046854026.1	66.52	453	681	216	3	12	550	80.76	3	677	776	87	87	4	678	693	0	917	2369
NV2g023081000.1	NV2t023081001.1	XP_046860215.1	30.93	133	430	257	10	40	221	51.4	81	487	494	82	82	123	535	538	3.99e-67	224	572
NV2g023095000.1	NV2t023095001.1	XP_046857709.1	64.762	136	210	70	2	4	165	78.57	1	209	209	100	100	1	207	207	9.26e-98	282	722
NV2g023451000.1	NV2t023451001.1	XP_046856119.1	61.252	460	751	288	2	3	584	77.76	4	754	754	99	99	12	759	759	0	981	2535
NV2g023613000.1	NV2t023613001.1	XP_046864872.1	67.226	441	656	205	4	10	509	77.59	1	650	875	74	74	1	652	788	0	904	2335
NV2g023619000.1	NV2t023619001.1	XP_046857213.1	49.425	129	261	132	0	0	178	68.2	1	261	268	97	97	1	261	267	2.16e-93	276	705
NV2g023668000.1	NV2t023668001.1	XP_046861022.1	60.714	119	196	76	1	1	148	75.51	1	195	201	97	97	1	196	196	4.81e-88	257	656
NV2g024302000.1	NV2t024302001.1	XP_046864027.1	41.007	114	278	160	2	4	174	62.59	231	506	512	71	54	307	582	584	6.45e-69	231	589
NV2g024308000.1	NV2t024308001.1	XP_046860696.1	51.22	63	123	57	2	3	87	70.73	4	126	177	69	69	8	127	165	3.39e-42	139	349
NV2g024332000.1	NV2t024332001.1	XP_046845162.1	48.214	135	280	135	2	10	188	67.14	91	370	376	74	74	94	363	368	1.61e-99	299	766
NV2g024348000.1	NV2t024348001.1	XP_046845384.1	33.75	81	240	133	3	26	123	51.25	94	333	1997	24	12	66	279	899	4.62e-33	139	351
NV2g024359000.1	NV2t024359002.1	XP_046844832.1	37.143	52	140	66	5	22	69	49.29	62	184	506	24	24	2	136	202	3.31e-19	85.9	211
NV2g024360000.1	NV2t024360001.1	XP_046844829.1	33.799	121	358	186	13	51	184	51.4	50	373	1289	61	25	99	439	1013	1.81e-50	194	494
NV2g024780000.1	NV2t024780001.1	XP_046845157.1	43.005	83	193	106	3	4	128	66.32	1	190	190	100	100	1	192	192	4.1e-54	170	431
NV2g024826000.1	NV2t024826002.1	XP_046845714.1	45.161	70	155	85	0	0	102	65.81	36	190	193	80	80	3	157	162	5.89e-49	156	395
NV2g024951000.1	NV2t024951002.1	XP_046845129.1	42.911	227	529	276	8	26	338	63.89	20	536	552	94	94	5	519	554	1.34e-151	446	1146
NV2g025130000.1	NV2t025130001.1	XP_046844502.1	38.06	204	536	301	8	31	294	54.85	30	549	591	88	88	27	547	612	1.78e-117	361	927
NV2g025184000.1	NV2t025184002.1	XP_046843962.1	43.157	637	1476	721	26	118	902	61.11	29	1489	1496	98	98	21	1393	1400	0	1255	3247
NV2g025327000.1	NV2t025327001.1	XP_046844286.1	44.643	150	336	173	7	13	216	64.29	287	619	623	53	53	687	1012	1015	1.91e-88	296	757
NV2g025410000.1	NV2t025410001.1	XP_046844619.1	64.828	94	145	50	1	1	117	80.69	259	402	406	35	35	217	361	367	4.32e-65	212	539
NV2g025428000.1	NV2t025428001.1	XP_046844616.1	54.203	187	345	153	3	5	252	73.04	123	462	467	73	73	120	464	467	2.03e-142	416	1069
NV2g025537000.1	NV2t025537001.1	XP_046849601.1	52.564	205	390	161	3	24	251	64.36	10	375	376	97	97	3	392	395	1.99e-151	432	1112

## Sheet: Hydra
gene_id	query_id	subject_id	perc_identity	num_ident_matches	alig_length	mismatches	gap_openings	n_gaps	pos_match	ppos	q_start	q_end	q_len	qcov	qcovhsp	s_start	s_end	s_len	evalue	bit_score	score_raw
NV2g000118000.1	NV2t000118001.1	XP_065648137.1	53.588	351	655	271	7	33	444	67.79	10	650	654	98	98	26	661	663	0	715	1846
NV2g000119000.1	NV2t000119001.1	XP_065672473.1	23.45	87	371	239	10	45	160	43.13	110	448	492	69	69	84	441	570	7.21e-21	96.3	238
NV2g000273000.1	NV2t000273001.1	XP_065674346.1	47.188	193	409	213	3	3	285	69.68	1	407	410	99	99	1	408	412	1.7e-134	392	1006
NV2g000295000.1	NV2t000295001.1	XP_065657156.1	46.865	299	638	311	8	28	413	64.73	24	649	651	96	96	21	642	642	0	575	1481
NV2g000667000.1	NV2t000667001.1	XP_065664151.1	32.37	56	173	117	0	0	97	56.07	10	182	187	93	93	72	244	290	3.97e-37	130	326
NV2g000675000.1	NV2t000675002.1	XP_065657239.1	61.48	241	392	139	5	12	299	76.28	62	444	688	75	56	98	486	750	6.52e-174	515	1326
NV2g000767000.1	NV2t000767001.1	XP_065667540.1	30.534	40	131	86	4	5	69	52.67	27	153	185	69	69	12	141	153	1.72e-16	73.2	178
NV2g000919000.1	NV2t000919004.1	XP_065672876.1	36.657	125	341	143	9	73	176	51.61	32	371	451	75	75	18	286	364	4.26e-63	208	530
NV2g000922000.1	NV2t000922001.1	XP_065667279.1	47.42	193	407	194	5	20	266	65.36	4	402	418	95	95	2	396	416	2.54e-127	374	960
NV2g000930000.1	NV2t000930001.1	XP_065657223.1	36.809	233	633	359	8	41	369	58.29	73	694	710	88	88	49	651	657	1.23e-152	458	1178
NV2g000931000.1	NV2t000931001.1	XP_065657222.1	34.364	200	582	327	12	55	313	53.78	63	595	596	89	89	10	585	585	2.78e-110	342	878
NV2g000949000.1	NV2t000949001.1	XP_065657186.1	58.532	343	586	220	9	23	429	73.21	11	586	589	98	98	23	595	596	0	673	1736
NV2g001169000.1	NV2t001169001.1	XP_065657028.1	68.9	576	836	229	8	31	685	81.94	7	837	847	98	98	7	816	825	0	1103	2854
NV2g001170000.1	NV2t001170001.1	XP_065657029.1	43.257	170	393	203	9	20	237	60.31	2	383	449	85	85	4	387	487	7.99e-98	302	773
NV2g001183000.1	NV2t001183001.1	XP_065666872.1	45.663	179	392	211	2	2	251	64.03	9	399	399	98	98	6	396	396	1.67e-119	352	904
NV2g001302000.1	NV2t001302001.1	XP_065676402.1	37.5	192	512	280	10	40	310	60.55	51	533	538	90	90	74	574	578	4.67e-102	319	817
NV2g001389000.1	NV2t001389001.1	XP_065662041.1	61.074	182	298	115	1	1	231	77.52	2	298	309	96	96	5	302	308	1.48e-133	381	979
NV2g001823000.1	NV2t001823001.1	XP_065649439.1	32.298	52	161	101	1	8	93	57.76	94	246	307	50	50	62	222	251	7.65e-25	100	250
NV2g001824000.1	NV2t001824001.1	NP_001296711.1	49.608	316	637	296	8	25	405	63.58	4	638	643	99	99	3	616	624	0	606	1562
NV2g002533000.1	NV2t002533001.1	XP_065670719.1	50	68	136	64	2	4	86	63.24	4	136	363	37	37	16	150	203	9.95e-39	137	345
NV2g002652000.1	NV2t002652001.1	XP_065669376.1	46.021	133	289	145	4	11	195	67.47	15	300	302	95	95	12	292	292	4.48e-73	227	578
NV2g002702000.1	NV2t002702001.1	XP_065667211.1	31.092	37	119	82	0	0	70	58.82	67	185	185	64	64	64	182	182	5.33e-19	80.5	197
NV2g002739000.1	NV2t002739003.1	XP_065651693.1	32.816	148	451	282	8	21	247	54.77	4	447	486	91	91	6	442	465	2.26e-76	247	631
NV2g002801000.1	NV2t002801001.1	XP_065647709.1	31.599	255	807	494	18	58	375	46.47	495	1260	1261	62	61	1003	1792	2136	1.59e-112	390	1002
NV2g002966000.1	NV2t002966004.1	XP_065669919.1	58.912	195	331	93	8	43	228	68.88	26	320	320	92	92	15	338	338	1.52e-117	342	878
NV2g003098000.1	NV2t003098001.1	XP_065668573.1	52.069	390	749	329	12	30	540	72.1	27	764	773	95	95	33	762	766	0	806	2081
NV2g003099000.1	NV2t003099001.1	XP_065668995.1	27.143	38	140	77	3	25	66	47.14	1	140	143	98	98	1	115	126	2.26e-11	57.8	138
NV2g003135000.1	NV2t003135001.1	XP_065667356.1	55.875	214	383	168	1	1	272	71.02	77	459	495	77	77	37	418	537	1.13e-152	446	1147
NV2g003222000.1	NV2t003222001.1	XP_065649088.1	40.909	81	198	112	2	5	114	57.58	6	200	202	97	97	5	200	200	3.03e-48	156	395
NV2g003555000.1	NV2t003555001.1	XP_065669669.1	39.157	65	166	97	1	4	112	67.47	690	855	859	62	19	1528	1689	1703	5.58e-38	154	389
NV2g003783000.1	NV2t003783002.1	XP_065667273.1	53.147	380	715	270	15	65	493	68.95	21	706	760	90	90	7	685	737	0	686	1771
NV2g003818000.1	NV2t003818001.1	XP_065670119.1	34.694	68	196	121	2	7	127	64.8	44	236	239	81	81	26	217	230	4.64e-47	155	393
NV2g004067000.1	NV2t004067001.1	XP_065675307.1	27.225	361	1326	872	34	93	621	46.83	335	1608	1877	92	68	4863	6147	7398	1.86e-127	448	1152
NV2g004231000.1	NV2t004231001.1	XP_065676258.1	44.301	171	386	206	6	9	253	65.54	63	442	449	85	85	77	459	472	4.74e-120	358	920
NV2g004506000.1	NV2t004506001.1	XP_065676799.1	38	57	150	82	3	11	93	62	16	165	174	86	86	12	150	155	5.25e-37	125	314
NV2g005137000.1	NV2t005137001.1	XP_065676463.1	47.872	180	376	189	4	7	257	68.35	53	427	466	80	80	59	428	437	2.95e-125	371	953
NV2g005187000.1	NV2t005187002.1	XP_065650171.1	38.679	41	106	64	1	1	60	56.6	31	135	174	60	60	1	106	193	1.7e-20	84.3	207
NV2g005188000.1	NV2t005188002.1	XP_065676428.1	47.292	131	277	130	3	16	167	60.29	995	1262	1271	21	21	1115	1384	1410	1.85e-59	225	573
NV2g005189000.1	NV2t005189001.1	XP_065651199.1	31.2	39	125	81	1	5	65	52	20	139	141	85	85	17	141	190	3.88e-21	84.7	208
NV2g005194000.1	NV2t005194001.1	XP_065676600.1	37.662	87	231	101	4	43	114	49.35	47	234	235	80	80	30	260	260	3.79e-51	167	423
NV2g005199000.1	NV2t005199002.1	NP_001267882.1	80.233	207	258	47	2	4	222	86.05	10	264	264	97	97	18	274	274	8.11e-106	308	788
NV2g005200000.1	NV2t005200001.1	NP_001267836.1	78.598	213	271	54	2	4	229	84.5	8	275	295	91	91	6	275	292	5.07e-120	346	887
NV2g005415000.1	NV2t005415001.1	XP_065649776.1	27.664	135	488	286	20	67	238	48.77	63	514	523	86	86	23	479	479	1.23e-39	150	379
NV2g005499000.1	NV2t005499001.1	XP_065652323.1	45.732	225	492	258	6	9	321	65.24	5	492	498	98	98	24	510	510	4.37e-147	431	1108
NV2g005704000.1	NV2t005704001.1	XP_065658331.1	43.273	238	550	263	11	49	332	60.36	14	519	599	84	84	29	573	593	4.19e-150	445	1145
NV2g005705000.1	NV2t005705002.1	XP_065651596.1	51.5	206	400	185	5	9	274	68.5	40	437	708	75	56	41	433	734	8.48e-136	417	1072
NV2g005910000.1	NV2t005910001.1	XP_065652092.1	47.754	319	668	317	11	32	425	63.62	22	677	682	96	96	145	792	794	0	600	1547
NV2g005917000.1	NV2t005917001.1	XP_065651688.1	50.301	334	664	301	14	29	429	64.61	82	735	779	84	84	221	865	890	0	604	1557
NV2g005948000.1	NV2t005948001.1	XP_065658327.1	49.888	223	447	207	10	17	298	66.67	8	447	534	82	82	6	442	444	1.47e-150	439	1128
NV2g005949000.1	NV2t005949001.1	XP_065651583.1	30.488	225	738	399	16	114	349	47.29	1	719	1746	99	41	12498	13140	14356	2.75e-95	345	884
NV2g006022000.1	NV2t006022001.1	XP_065651772.1	34.431	251	729	402	21	76	334	45.82	537	1235	1239	56	56	1471	2153	2835	2.95e-108	377	969
NV2g006117000.1	NV2t006117001.1	XP_065652089.1	29.121	53	182	103	5	26	87	47.8	22	183	203	80	80	29	204	227	2.67e-09	55.5	132
NV2g006119000.1	NV2t006119001.1	XP_065651355.1	38.645	97	251	130	9	24	140	55.78	51	285	287	82	82	172	414	417	1.93e-36	134	338
NV2g006162000.1	NV2t006162001.1	XP_065651420.1	39.935	123	308	182	1	3	184	59.74	221	528	1143	27	27	737	1041	1041	1.05e-73	266	679
NV2g006240000.1	NV2t006240001.1	XP_065673348.1	29.31	102	348	216	7	30	160	45.98	15	359	362	95	95	4	324	327	2.71e-27	110	274
NV2g006401000.1	NV2t006401002.1	XP_065652042.1	54.839	187	341	140	5	14	244	71.55	10	339	339	97	97	68	405	405	5.7e-123	359	922
NV2g006437000.1	NV2t006437001.1	XP_065651760.1	34.231	89	260	165	5	6	128	49.23	402	660	725	36	36	655	909	1353	4.55e-38	153	386
NV2g006444000.1	NV2t006444001.1	XP_065652294.1	40	354	885	422	18	109	468	52.88	261	1068	1275	72	63	500	1352	2734	0	607	1564
NV2g006479000.1	NV2t006479001.1	XP_065665045.1	46.207	134	290	149	4	7	181	62.41	115	397	400	71	71	74	363	363	5.88e-81	253	646
NV2g006485000.1	NV2t006485001.1	XP_065652486.1	57.364	148	258	110	0	0	187	72.48	92	349	350	74	74	151	408	409	2.91e-107	320	820
NV2g006517000.1	NV2t006517001.1	XP_065665073.1	46.507	213	458	243	1	2	301	65.72	8	465	467	98	98	3	458	459	7.76e-157	452	1164
NV2g006716000.1	NV2t006716003.1	XP_065652065.1	42.424	84	198	106	4	8	128	64.65	102	294	294	66	66	74	268	268	9.41e-53	173	439
NV2g006749000.1	NV2t006749003.1	XP_065651396.1	46.734	186	398	187	6	25	246	61.81	190	578	863	82	45	27	408	904	2.29e-108	354	909
NV2g006786000.1	NV2t006786004.1	XP_065652208.1	33.988	225	662	303	26	134	329	49.7	6	583	604	96	96	13	624	640	5.02e-89	289	739
NV2g007009000.1	NV2t007009001.1	XP_065659499.1	29.867	135	452	274	7	43	219	48.45	1	437	437	100	100	1	424	424	2.78e-61	205	521
NV2g007733000.1	NV2t007733001.1	XP_065659775.1	50.369	410	814	368	13	36	535	65.72	1	808	808	100	100	1	784	784	0	825	2131
NV2g007788000.1	NV2t007788001.1	XP_065674567.1	26.019	83	319	218	5	18	152	47.65	6	306	328	92	92	28	346	401	1.88e-31	122	305
NV2g008421000.1	NV2t008421001.1	XP_065653330.1	44.638	154	345	153	16	38	204	59.13	297	625	626	53	53	114	436	437	7.6e-68	228	580
NV2g008625000.1	NV2t008625001.1	XP_065649040.1	36.154	188	520	270	16	62	280	53.85	22	524	525	96	96	11	485	486	5.43e-98	305	781
NV2g008660000.1	NV2t008660001.1	XP_065649251.1	44.284	705	1592	757	36	130	1010	63.44	736	2289	2289	88	68	658	2157	2157	0	1217	3148
NV2g008737000.1	NV2t008737001.1	XP_065649276.1	47.79	346	724	325	12	53	466	64.36	9	725	725	99	99	1	678	682	0	644	1662
NV2g008766000.1	NV2t008766001.1	XP_065654257.1	66.569	227	341	110	2	4	276	80.94	79	417	443	77	77	89	427	483	5.51e-176	501	1290
NV2g008962000.1	NV2t008962001.1	XP_065676677.1	32.906	154	468	256	18	58	248	52.99	25	477	483	94	94	26	450	455	4.52e-68	225	573
NV2g008974000.1	NV2t008974001.1	XP_065648779.1	55.042	464	843	337	18	42	574	68.09	20	849	850	98	98	52	865	866	0	860	2222
NV2g009203000.1	NV2t009203001.1	XP_065674279.1	48.582	257	529	247	10	25	339	64.08	21	545	545	96	96	47	554	554	1.22e-163	476	1226
NV2g009508000.1	NV2t009508001.1	XP_065669355.1	30.802	73	237	135	6	29	102	43.04	130	341	415	51	51	16	248	538	1.72e-26	111	278
NV2g009511000.1	NV2t009511001.1	XP_065670472.1	50.507	548	1085	534	2	3	765	70.51	235	1316	1316	82	82	1761	2845	3397	0	1208	3126
NV2g009849000.1	NV2t009849001.1	XP_065669353.1	38.209	303	793	454	19	36	426	53.72	116	889	910	94	85	28	803	821	5.57e-168	510	1313
NV2g009863000.1	NV2t009863001.1	XP_065669626.1	47.307	202	427	180	7	45	266	62.3	156	557	561	72	72	184	590	599	4.91e-130	392	1008
NV2g009872000.1	NV2t009872001.1	XP_065669248.1	25.83	140	542	276	19	126	194	35.79	2	517	579	89	89	4	445	777	5.41e-19	91.7	226
NV2g010004000.1	NV2t010004001.1	NP_001267744.1	72.727	128	176	45	2	3	144	81.82	66	240	241	73	73	19	192	192	9.3e-92	268	685
NV2g010005000.1	NV2t010005001.1	XP_065667187.1	39.806	82	206	106	5	18	119	57.77	10	201	206	93	93	11	212	217	5.63e-45	149	375
NV2g010006000.1	NV2t010006001.1	XP_065668440.1	68.817	128	186	58	0	0	145	77.96	1	186	193	96	96	13	198	202	1.76e-95	276	706
NV2g010077000.1	NV2t010077002.1	NP_001267886.1	53.023	114	215	96	3	5	139	64.65	36	247	312	68	68	51	263	357	9.72e-73	228	582
NV2g010134000.1	NV2t010134001.1	XP_065670504.1	54.015	74	137	62	1	1	92	67.15	76	211	212	64	64	380	516	520	4.63e-48	164	416
NV2g010271000.1	NV2t010271001.1	XP_065670400.1	60.265	182	302	117	2	3	228	75.5	3	302	302	99	99	8	308	308	5.92e-137	390	1001
NV2g010340000.1	NV2t010340001.1	XP_065670823.1	33.1	189	571	330	13	52	302	52.89	2	551	661	96	83	957	1496	3822	5.69e-79	275	703
NV2g010343000.1	NV2t010343001.1	XP_065670484.1	46.479	66	142	47	5	29	78	54.93	582	716	725	19	19	295	414	456	5.45e-24	106	264
NV2g010387000.1	NV2t010387001.1	XP_065668416.1	39.879	394	988	490	16	104	556	56.28	24	948	1495	83	62	21	967	2046	0	740	1910
NV2g010539000.1	NV2t010539001.1	XP_065669621.1	43.365	415	957	484	15	58	577	60.29	1	920	924	99	99	1	936	940	0	775	2001
NV2g010559000.1	NV2t010559001.1	XP_065669627.1	34.066	62	182	106	5	14	98	53.85	49	219	225	76	76	31	209	303	2.63e-25	100	250
NV2g010560000.1	NV2t010560001.1	XP_065670543.1	49.649	212	427	207	5	8	291	68.15	1	427	437	98	98	11	429	467	2.27e-147	427	1099
NV2g010629000.1	NV2t010629001.1	XP_065667123.1	35.556	64	180	90	4	26	94	52.22	287	456	666	26	26	277	440	607	1.49e-18	90.1	222
NV2g010782000.1	NV2t010782001.1	XP_065666833.1	52.254	255	488	223	3	10	337	69.06	34	521	561	87	87	7	484	543	6.44e-180	518	1335
NV2g010997000.1	NV2t010997001.1	XP_065665237.1	39.15	175	447	204	8	68	232	51.9	1394	1839	1839	24	24	1980	2359	2361	2.69e-83	305	782
NV2g011056000.1	NV2t011056001.1	XP_065648136.1	53.584	299	558	211	6	48	382	68.46	31	578	583	94	94	40	559	586	0	619	1596
NV2g011074000.1	NV2t011074001.1	XP_065666985.1	63.91	340	532	160	4	32	397	74.62	3	518	534	97	97	24	539	705	0	681	1758
NV2g011077000.1	NV2t011077001.1	XP_065666831.1	37.5	198	528	290	7	40	298	56.44	10	518	538	95	95	8	514	562	3.84e-119	362	930
NV2g011286000.1	NV2t011286001.1	XP_065655378.1	37.6	141	375	220	9	14	211	56.27	19	388	902	41	41	2284	2649	3171	1.24e-68	250	639
NV2g011317000.1	NV2t011317001.1	XP_065666209.1	56.068	328	585	240	3	17	422	72.14	7	590	595	98	98	5	573	582	0	695	1793
NV2g011394000.1	NV2t011394001.1	XP_065667104.1	48.155	274	569	252	10	43	368	64.67	194	758	760	93	74	272	801	802	0	570	1468
NV2g011395000.1	NV2t011395001.1	XP_065665157.1	50.718	106	209	97	3	6	148	70.81	1	209	215	97	97	1	203	209	4.47e-75	225	574
NV2g011584000.1	NV2t011584001.1	XP_065652548.1	91.574	413	451	38	0	0	435	96.45	18	468	468	96	96	1	451	451	0	857	2215
NV2g011608000.1	NV2t011608001.1	XP_065654691.1	76.623	59	77	18	0	0	63	81.82	73	149	178	43	43	110	186	212	2.44e-35	123	308
NV2g011673000.1	NV2t011673001.1	XP_065666043.1	41.368	242	585	292	11	51	331	56.58	32	570	582	93	93	11	590	590	4.1e-131	396	1017
NV2g011802000.1	NV2t011802003.1	XP_065666546.1	31.452	78	248	165	2	5	143	57.66	164	410	428	58	58	142	385	462	3.94e-41	152	383
NV2g011824000.1	NV2t011824001.1	XP_065665308.1	45.745	43	94	50	1	1	61	64.89	33	125	675	14	14	60	153	752	2.02e-16	84	206
NV2g011829000.1	NV2t011829001.1	XP_065657716.1	42.051	410	975	523	19	42	584	59.9	43	1007	1007	96	96	42	984	984	0	778	2009
NV2g011931000.1	NV2t011931001.1	XP_065661612.1	44.444	316	711	358	11	37	452	63.57	27	718	718	96	96	9	701	701	0	605	1561
NV2g011931000.1	NV2t011931002.1	XP_065661626.1	45.627	313	686	342	8	31	456	66.47	36	717	717	95	95	31	689	689	0	624	1609
NV2g012016000.1	NV2t012016001.1	NP_001287927.1	31.522	29	92	58	1	5	43	46.74	46	132	144	60	60	61	152	160	2.38e-12	61.2	147
NV2g012144000.1	NV2t012144002.1	XP_065656031.1	28.727	79	275	183	6	13	138	50.18	536	801	969	27	27	936	1206	1634	3.57e-27	120	300
NV2g012200000.1	NV2t012200001.1	XP_065676018.1	69.507	310	446	126	2	10	370	82.96	1	442	462	96	96	1	440	447	0	650	1676
NV2g012315000.1	NV2t012315001.1	XP_065666595.1	61.916	252	407	148	4	7	314	77.15	151	552	559	72	72	3	407	413	0	528	1361
NV2g012363000.1	NV2t012363001.1	XP_065661723.1	38.761	169	436	249	8	18	247	56.65	16	440	440	97	97	22	450	450	2.03e-94	292	747
NV2g012483000.1	NV2t012483001.1	XP_065665972.1	49.153	174	354	168	4	12	239	67.51	5	352	363	96	96	4	351	355	5.3e-129	374	960
NV2g012511000.1	NV2t012511001.1	XP_065665266.1	61.075	375	614	223	5	16	462	75.24	3	616	617	99	99	4	601	603	0	771	1992
NV2g012540000.1	NV2t012540001.1	XP_065666718.1	39.344	48	122	63	5	11	67	54.92	71	191	198	61	61	33	144	147	6.87e-15	68.9	167
NV2g012542000.1	NV2t012542001.1	XP_065666716.1	43.443	53	122	57	3	12	71	58.2	120	236	546	41	21	250	364	532	4.66e-14	75.1	183
NV2g012573000.1	NV2t012573001.1	XP_065657358.1	35.238	74	210	126	4	10	107	50.95	64	263	286	70	70	118	327	338	6.48e-31	118	295
NV2g012589000.1	NV2t012589001.1	XP_065646621.1	32.331	129	399	239	10	31	191	47.87	27	421	428	92	92	16	387	394	5.29e-66	216	550
NV2g012695000.1	NV2t012695002.1	XP_065655004.1	62.898	178	283	99	1	6	228	80.57	1	283	546	52	52	1	277	461	9.14e-132	392	1006
NV2g012695000.1	NV2t012695003.1	XP_065654999.1	59.58	227	381	147	2	7	300	78.74	78	458	721	53	53	51	424	608	9.49e-168	496	1276
NV2g012708000.1	NV2t012708001.1	XP_065656302.1	55.319	26	47	21	0	0	37	78.72	351	397	398	12	12	184	230	232	7.55e-15	73.9	180
NV2g012709000.1	NV2t012709001.1	XP_065652690.1	40.65	50	123	60	4	13	73	59.35	11	123	380	30	30	22	141	277	8.15e-18	83.2	204
NV2g012788000.1	NV2t012788001.1	XP_065664944.1	43.478	60	138	78	0	0	80	57.97	108	245	254	54	54	427	564	576	1.91e-33	127	319
NV2g012871000.1	NV2t012871003.1	XP_065655413.1	40.882	139	340	180	5	21	196	57.65	1	332	339	98	98	31	357	378	2.21e-77	242	617
NV2g012897000.1	NV2t012897001.1	XP_065655300.1	80.247	65	81	16	0	0	78	96.3	268	348	357	57	23	355	435	437	1.01e-40	148	374
NV2g013059000.1	NV2t013059001.1	XP_065662315.1	28.436	60	211	142	3	9	114	54.03	1152	1356	1361	20	15	699	906	909	2.84e-18	91.7	226
NV2g013095000.1	NV2t013095001.1	XP_065656107.1	41.808	148	354	178	7	28	209	59.04	2	329	330	99	99	1	352	355	2.26e-89	271	694
NV2g013194000.1	NV2t013194001.1	XP_065667261.1	32.282	215	666	371	16	80	325	48.8	9	644	646	98	98	3	618	619	6.05e-106	334	856
NV2g013246000.1	NV2t013246001.1	XP_065671414.1	49.589	181	365	175	6	9	249	68.22	109	469	586	62	62	28	387	426	1.14e-111	340	873
NV2g013381000.1	NV2t013381001.1	XP_065656503.1	32.658	129	395	197	14	69	188	47.59	463	844	877	44	44	1326	1664	2014	1.54e-47	184	468
NV2g013424000.1	NV2t013424001.1	XP_065653158.1	48.801	468	959	464	9	27	640	66.74	1	938	938	100	100	394	1346	1352	0	974	2517
NV2g013450000.1	NV2t013450001.1	XP_065670958.1	41.287	263	637	352	10	22	407	63.89	26	658	658	96	96	31	649	681	0	538	1385
NV2g013500000.1	NV2t013500001.1	XP_065654341.1	24.471	324	1324	925	28	75	620	46.83	8	1293	1520	99	85	6	1292	1839	2.34e-129	444	1141
NV2g013532000.1	NV2t013532001.1	XP_065668640.1	49.367	273	553	271	2	9	381	68.9	12	555	604	90	90	8	560	561	0	533	1372
NV2g013532000.1	NV2t013532002.1	XP_065655238.1	46.166	289	626	277	8	60	398	63.58	7	574	618	92	92	11	634	635	0	543	1399
NV2g013804000.1	NV2t013804004.1	XP_065656147.1	76.546	359	469	108	1	2	406	86.57	1	467	480	97	97	8	476	510	0	752	1941
NV2g014005000.1	NV2t014005001.1	XP_065654033.1	35.744	771	2157	1145	43	241	1117	51.78	2	2023	2433	83	83	971	3021	3023	0	1237	3201
NV2g014187000.1	NV2t014187003.1	XP_065656556.1	53.767	157	292	122	4	13	201	68.84	1	283	286	99	99	1	288	289	5.13e-110	320	820
NV2g014230000.1	NV2t014230001.1	XP_065661638.1	41.645	324	778	391	13	63	466	59.9	36	805	805	96	96	36	758	758	0	627	1618
NV2g014320000.1	NV2t014320001.1	XP_065674548.1	28.402	48	169	104	3	17	73	43.2	31	182	479	32	32	22	190	1394	1.06e-12	71.2	173
NV2g014428000.1	NV2t014428001.1	XP_065656575.1	50.532	190	376	183	2	3	255	67.82	14	389	574	66	66	3	375	803	2.33e-139	424	1089
NV2g014591000.1	NV2t014591001.1	XP_065650557.1	58.524	460	786	279	8	47	576	73.28	52	827	887	87	87	131	879	914	0	941	2433
NV2g014846000.1	NV2t014846001.1	XP_065659061.1	28.99	89	307	175	13	43	138	44.95	80	356	357	78	78	35	328	332	1.33e-27	110	276
NV2g015027000.1	NV2t015027001.1	XP_065653814.1	58.042	83	143	25	2	35	92	64.34	3	115	204	55	55	89	226	298	2.99e-51	167	423
NV2g015241000.1	NV2t015241001.1	XP_065655669.1	50.784	162	319	155	2	2	229	71.79	124	441	491	65	65	103	420	642	1.4e-115	354	909
NV2g015283000.1	NV2t015283001.1	XP_065660778.1	38.206	115	301	152	7	34	177	58.8	699	966	1061	25	25	374	673	1098	5.39e-52	199	506
NV2g015546000.1	NV2t015546001.1	XP_065670521.1	35.041	342	976	600	19	34	535	54.82	10	964	977	98	98	39	1001	1011	0	574	1479
NV2g015854000.1	NV2t015854001.1	NP_001267789.1	33.518	121	361	217	11	23	182	50.42	24	379	387	92	92	17	359	369	2.7e-51	176	445
NV2g015872000.1	NV2t015872001.1	NP_001274304.1	29.571	131	443	285	9	27	210	47.4	2	421	1090	39	39	3	441	774	2.31e-53	201	511
NV2g015874000.1	NV2t015874001.1	XP_065663865.1	47.39	236	498	252	5	10	334	67.07	7	499	501	98	98	15	507	529	6.29e-156	454	1168
NV2g015883000.1	NV2t015883001.1	XP_065668759.1	37.143	130	350	213	5	7	205	58.57	315	660	678	51	51	515	861	888	4.04e-76	262	669
NV2g015888000.1	NV2t015888001.1	XP_065669760.1	48.476	175	361	151	6	35	245	67.87	150	502	503	70	70	259	592	593	4.86e-123	372	956
NV2g015888000.1	NV2t015888002.1	XP_065669759.1	53.067	199	375	141	5	35	248	66.13	150	516	516	71	71	259	606	606	2.03e-133	400	1027
NV2g016007000.1	NV2t016007001.1	XP_065670257.1	47.95	269	561	275	9	17	376	67.02	57	605	614	89	89	874	1429	1456	0	558	1439
NV2g016021000.1	NV2t016021001.1	XP_065664293.1	51.291	298	581	265	3	18	396	68.16	1	569	569	100	100	49	623	623	0	599	1545
NV2g016097000.1	NV2t016097003.1	XP_065663195.1	55.627	346	622	265	6	11	437	70.26	30	642	664	92	92	16	635	635	0	729	1881
NV2g016334000.1	NV2t016334001.1	XP_065664179.1	41.036	103	251	137	4	11	153	60.96	54	302	503	50	50	37	278	518	1.11e-59	205	521
NV2g016632000.1	NV2t016632001.1	XP_065663750.1	47.464	131	276	142	3	3	188	68.12	138	411	539	72	51	248	522	895	1.21e-90	297	760
NV2g016972000.1	NV2t016972002.1	XP_065663387.1	43.897	187	426	234	5	5	282	66.2	69	491	491	86	86	35	458	474	5.81e-138	406	1043
NV2g017002000.1	NV2t017002001.1	XP_065664008.1	40.574	99	244	107	6	38	147	60.25	451	691	1152	42	21	972	1180	1862	1.77e-42	170	431
NV2g017054000.1	NV2t017054001.1	XP_065663981.1	25.82	126	488	308	12	54	222	45.49	28	508	510	94	94	32	472	484	8.52e-38	145	365
NV2g017169000.1	NV2t017169001.1	XP_065663389.1	47.601	258	542	256	5	28	352	64.94	29	570	1067	66	51	47	560	977	2.6e-176	541	1395
NV2g017396000.1	NV2t017396001.1	XP_065647238.1	41.86	90	215	118	6	7	135	62.79	493	703	709	30	30	1574	1785	1791	2.2e-45	176	445
NV2g017614000.1	NV2t017614003.1	XP_065658330.1	42.642	113	265	136	6	16	161	60.75	71	330	336	77	77	85	338	346	1.05e-62	203	516
NV2g017723000.1	NV2t017723001.1	XP_065647409.1	37.755	111	294	180	2	3	174	59.18	8	299	299	98	98	1	293	293	2.78e-59	191	486
NV2g017826000.1	NV2t017826001.1	XP_065649229.1	51.497	86	167	77	2	4	106	63.47	698	861	886	19	19	537	702	763	1.19e-43	170	431
NV2g017877000.1	NV2t017877001.1	NP_001296714.1	65.596	143	218	57	3	18	164	75.23	92	309	310	70	70	259	458	466	6.43e-98	296	758
NV2g018052000.1	NV2t018052001.1	XP_065646618.1	51.119	297	581	262	5	22	396	68.16	24	597	1124	51	51	32	597	1635	0	634	1634
NV2g018119000.1	NV2t018119001.1	XP_065655589.1	44.615	145	325	157	3	23	205	63.08	9	331	336	96	96	7	310	316	1.42e-93	281	719
NV2g018299000.1	NV2t018299001.1	XP_065648387.1	62.461	396	634	224	5	14	485	76.5	225	850	850	74	74	314	941	943	0	829	2141
NV2g018394000.1	NV2t018394005.1	XP_065645078.1	28.972	62	214	142	5	10	101	47.2	129	335	343	60	60	27	237	242	3.32e-27	107	268
NV2g018480000.1	NV2t018480001.1	XP_065649943.1	36.964	319	863	478	11	66	485	56.2	185	1021	1025	97	82	23	845	862	0	598	1541
NV2g018535000.1	NV2t018535001.1	XP_065647881.1	70.922	100	141	41	0	0	123	87.23	158	298	330	53	43	183	323	325	1.11e-71	225	574
NV2g018585000.1	NV2t018585001.1	XP_065649122.1	32.432	108	333	210	4	15	171	51.35	257	581	687	47	47	107	432	1001	1.33e-58	214	544
NV2g018597000.1	NV2t018597001.1	XP_065647014.1	50.809	377	742	359	3	6	513	69.14	10	748	748	99	99	8	746	746	0	804	2076
NV2g018751000.1	NV2t018751001.1	XP_065649592.1	41.784	178	426	232	8	16	266	62.44	1	422	423	99	99	674	1087	1198	2.44e-108	345	886
NV2g018752000.1	NV2t018752001.1	XP_065670545.1	24.468	161	658	359	18	138	267	40.58	816	1357	1402	39	39	446	1081	1097	6.56e-46	181	459
NV2g018783000.1	NV2t018783003.1	XP_065648632.1	58.382	303	519	174	4	42	369	71.1	20	533	573	90	90	11	492	492	0	606	1563
NV2g018784000.1	NV2t018784001.1	XP_065670871.1	43.173	117	271	139	6	15	162	59.78	17	283	822	32	32	13	272	787	1.13e-60	220	560
NV2g018831000.1	NV2t018831001.1	NP_001267826.1	26.837	84	313	172	7	57	133	42.49	44	318	323	85	85	13	306	314	1.34e-14	73.6	179
NV2g018846000.1	NV2t018846001.1	XP_065649205.1	53.595	164	306	127	6	15	220	71.9	41	333	333	88	88	45	348	349	6.4e-118	344	883
NV2g018856000.1	NV2t018856001.1	XP_065649547.1	57.609	318	552	159	18	75	370	67.03	130	614	614	79	79	99	642	656	0	563	1450
NV2g018915000.1	NV2t018915001.1	XP_065650018.1	57.645	279	484	197	3	8	363	75	26	508	546	88	88	267	743	760	0	588	1517
NV2g018954000.1	NV2t018954001.1	XP_065649032.1	43.498	97	223	65	7	61	114	51.12	24	238	238	90	90	27	196	196	5.33e-45	149	377
NV2g019340000.1	NV2t019340013.1	XP_065662039.1	33.75	54	160	96	3	10	88	55	31	186	195	80	80	12	165	171	1.22e-21	87.4	215
NV2g019366000.1	NV2t019366001.1	XP_065666315.1	26.147	114	436	277	9	45	186	42.66	27	458	467	93	93	46	440	466	5.36e-42	155	392
NV2g019727000.1	NV2t019727001.1	XP_065670263.1	38.043	105	276	144	10	27	149	53.99	38	292	293	87	87	393	662	779	5.24e-49	174	440
NV2g019758000.1	NV2t019758001.1	XP_065661099.1	29.434	78	265	174	4	13	131	49.43	1	254	271	94	94	41	303	328	4.98e-34	125	315
NV2g020036000.1	NV2t020036001.1	XP_065644132.1	40.389	187	463	252	9	24	274	59.18	67	527	528	87	87	86	526	528	2.19e-111	341	875
NV2g020240000.1	NV2t020240001.1	XP_065665892.1	55.083	233	423	186	3	4	289	68.32	56	477	480	88	88	79	498	498	2.06e-171	492	1266
NV2g020267000.1	NV2t020267001.1	XP_065660571.1	25.176	250	993	600	21	143	441	44.41	27	949	952	97	97	42	961	961	3.76e-76	269	688
NV2g020521000.1	NV2t020521001.1	XP_065674748.1	42.191	208	493	258	8	27	294	59.63	18	506	506	97	97	53	522	525	2.79e-136	404	1038
NV2g020838000.1	NV2t020838001.1	XP_065654252.1	44.578	74	166	82	2	10	103	62.05	2	158	169	93	93	75	239	284	5.77e-46	152	383
NV2g021053000.1	NV2t021053001.1	XP_065661211.1	50.939	217	426	189	8	20	305	71.6	23	442	442	95	95	26	437	437	7.18e-151	436	1120
NV2g021109000.1	NV2t021109001.1	XP_065660626.1	41.624	82	197	113	2	2	130	65.99	22	217	228	86	86	13	208	235	2.15e-54	174	441
NV2g021183000.1	NV2t021183001.1	XP_065667403.1	53.6	67	125	58	0	0	80	64	65	189	308	41	41	17	141	239	2.42e-35	128	321
NV2g021271000.1	NV2t021271001.1	XP_065644298.1	34.884	90	258	164	3	4	142	55.04	51	307	566	76	45	123	377	763	1.37e-49	183	465
NV2g021461000.1	NV2t021461003.1	XP_065644640.1	35.011	153	437	203	16	81	213	48.74	3	412	412	99	99	7	389	389	3.46e-53	182	461
NV2g021577000.1	NV2t021577001.1	XP_065644352.1	29.474	112	380	220	10	48	174	45.79	2300	2638	2824	23	12	497	869	876	1.51e-41	167	424
NV2g021582000.1	NV2t021582001.1	XP_065644616.1	49.306	71	144	66	2	7	98	68.06	41	177	202	68	68	45	188	218	2.28e-46	152	384
NV2g021600000.1	NV2t021600001.1	XP_065657281.1	31.206	44	141	79	6	18	66	46.81	1	126	127	99	99	1	138	139	9.78e-11	55.8	133
NV2g021667000.1	NV2t021667001.1	XP_065666105.1	43.575	78	179	96	2	5	103	57.54	2	176	189	93	93	48	225	235	1.15e-40	137	346
NV2g022155000.1	NV2t022155002.1	XP_065644684.1	36.335	698	1921	1046	38	177	1040	54.14	248	2062	2064	88	88	561	2410	2421	0	1256	3249
NV2g022291000.1	NV2t022291001.1	XP_065645021.1	35.936	382	1063	598	15	83	563	52.96	101	1112	1120	90	90	149	1179	1186	0	673	1737
NV2g022452000.1	NV2t022452001.1	XP_065644361.1	29.836	91	305	199	5	15	147	48.2	17	309	381	77	77	18	319	375	1.25e-44	158	399
NV2g022454000.1	NV2t022454001.1	XP_065644540.1	66.964	150	224	73	1	1	181	80.8	177	399	415	54	54	181	404	424	1.57e-111	334	856
NV2g022507000.1	NV2t022507001.1	XP_065643919.1	64.865	144	222	72	4	6	170	76.58	1	220	232	95	95	1	218	414	5.62e-92	276	706
NV2g022721000.1	NV2t022721001.1	XP_065645019.1	42.634	191	448	203	7	54	265	59.15	17	435	435	96	96	17	439	441	1.12e-112	338	867
NV2g022756000.1	NV2t022756001.1	XP_065644126.1	50.542	280	554	268	3	6	372	67.15	60	612	728	76	76	71	619	1268	0	597	1538
NV2g023081000.1	NV2t023081001.1	XP_065666479.1	28.477	129	453	258	21	66	215	47.46	63	483	494	85	85	54	472	473	1.99e-36	140	354
NV2g023095000.1	NV2t023095001.1	XP_065661095.1	64.824	129	199	67	1	3	157	78.89	1	196	209	94	94	1	199	202	6.37e-94	273	697
NV2g023131000.1	NV2t023131001.1	XP_065670971.1	68.132	62	91	25	1	4	72	79.12	156	242	257	34	34	112	202	255	2.87e-40	139	351
NV2g023451000.1	NV2t023451001.1	XP_065670970.1	57.105	430	753	318	3	5	576	76.49	3	754	754	99	99	5	753	753	0	921	2380
NV2g023613000.1	NV2t023613001.1	XP_065671086.1	66.716	449	673	215	6	9	522	77.56	10	679	875	77	77	14	680	863	0	930	2404
NV2g023839000.1	NV2t023839001.1	XP_065658325.1	45.344	224	494	241	7	29	312	63.16	36	522	526	93	93	70	541	544	7.46e-138	409	1052
NV2g024307000.1	NV2t024307001.1	XP_065672763.1	35.329	59	167	96	3	12	88	52.69	5	171	548	30	30	9	163	1890	2.94e-25	111	277
NV2g024308000.1	NV2t024308001.1	XP_065672625.1	48.077	50	104	52	2	2	66	63.46	24	127	177	59	59	19	120	217	5.98e-28	104	259
NV2g024332000.1	NV2t024332001.1	XP_065667125.1	42.913	109	254	140	3	5	165	64.96	117	367	376	67	67	91	342	350	3.06e-78	244	624
NV2g024780000.1	NV2t024780001.1	XP_065647572.1	25.899	36	139	102	1	1	80	57.55	16	153	190	73	73	18	156	182	1.66e-17	76.6	187
NV2g024826000.1	NV2t024826002.1	XP_065663490.1	40.385	63	156	88	1	5	98	62.82	35	185	193	78	78	5	160	169	1.28e-32	115	288
NV2g024951000.1	NV2t024951003.1	XP_065647740.1	41.214	258	626	264	9	104	375	59.9	25	635	639	96	96	23	559	563	8.75e-174	506	1304
NV2g025130000.1	NV2t025130001.1	XP_065646398.1	33.874	188	555	313	11	54	291	52.43	27	552	591	89	89	34	563	636	1.88e-101	321	822
NV2g025184000.1	NV2t025184002.1	XP_065647147.1	38.525	606	1573	815	28	152	846	53.78	32	1490	1496	98	98	35	1569	1580	0	1093	2828
NV2g025327000.1	NV2t025327001.1	XP_065647865.1	53.846	175	325	142	4	8	230	70.77	296	619	623	52	52	753	1070	1073	1.48e-114	367	943
NV2g025338000.1	NV2t025338001.1	XP_065662843.1	38.372	66	172	102	3	4	98	56.98	16	186	1212	14	14	7	175	198	6.54e-35	132	333
NV2g025410000.1	NV2t025410001.1	XP_065647174.1	65.649	86	131	41	1	4	100	76.34	276	402	406	31	31	174	304	319	5.3e-57	190	482
NV2g025428000.1	NV2t025428001.1	XP_065646644.1	52.329	191	365	166	5	8	247	67.67	106	467	467	78	78	56	415	415	3.06e-126	373	958
