# Supplementary material for: Lineage-specific elaboration of a conserved cnidogenic program drives cnidocyte diversification and illuminates cell type evolution
Source: Research Square preprint supplement (doi:10.21203/rs.3.rs-10009230/v1), 2026-06-30
Supplement: Supplementary file 3 [file 3727c4e24c1dcd390325630e.xlsx]

## Sheet: znf845
Nv_protein_ID
NV2g000118000.1
NV2g000131000.1
NV2g000160000.1
NV2g000273000.1
NV2g000295000.1
NV2g000363000.1
NV2g000372000.1
NV2g000381000.1
NV2g000667000.1
NV2g000737000.1
NV2g000738000.1
NV2g000767000.1
NV2g000919000.1
NV2g000920000.1
NV2g000922000.1
NV2g000930000.1
NV2g000931000.1
NV2g000932000.1
NV2g000950000.1
NV2g000951000.1
NV2g000974000.1
NV2g000975000.1
NV2g001045000.1
NV2g001046000.1
NV2g001047000.1
NV2g001056000.1
NV2g001122000.1
NV2g001169000.1
NV2g001170000.1
NV2g001255000.1
NV2g001302000.1
NV2g001333000.1
NV2g001356000.1
NV2g001389000.1
NV2g001407000.1
NV2g001477000.1	coup-like2
NV2g001572000.1
NV2g001605000.1
NV2g001823000.1
NV2g001851000.1
NV2g001889000.1
NV2g002081000.1
NV2g002239000.1
NV2g002309000.1
NV2g002581000.1
NV2g002621000.1
NV2g002625000.1
NV2g002628000.1
NV2g002644000.1
NV2g002652000.1
NV2g002698000.1
NV2g002702000.1
NV2g002739000.1
NV2g002966000.1	Nvpou4	TF
NV2g002968000.1
NV2g003092000.1
NV2g003098000.1
NV2g003099000.1
NV2g003111000.1
NV2g003200000.1
NV2g003202000.1
NV2g003222000.1
NV2g003325000.1
NV2g003330000.1
NV2g003442000.1
NV2g003554000.1
NV2g003555000.1
NV2g003609000.1
NV2g003610000.1
NV2g003634000.1
NV2g003674000.1
NV2g003675000.1
NV2g003697000.1
NV2g003783000.1
NV2g003805000.1
NV2g003818000.1
NV2g003835000.1
NV2g004010000.1
NV2g004066000.1
NV2g004067000.1
NV2g004093000.1
NV2g004150000.1
NV2g004172000.1
NV2g004231000.1
NV2g004233000.1
NV2g004235000.1
NV2g004247000.1
NV2g004258000.1
NV2g004478000.1
NV2g004505000.1
NV2g004506000.1
NV2g004511000.1
NV2g004514000.1
NV2g004684000.1
NV2g004707000.1
NV2g004794000.1
NV2g004880000.1
NV2g005100000.1
NV2g005136000.1
NV2g005137000.1
NV2g005138000.1
NV2g005193000.1
NV2g005195000.1
NV2g005196000.1
NV2g005198000.1
NV2g005199000.1
NV2g005200000.1	Ngal
NV2g005234000.1
NV2g005415000.1
NV2g005475000.1
NV2g005499000.1
NV2g005582000.1
NV2g005704000.1
NV2g005705000.1
NV2g005717000.1
NV2g005734000.1
NV2g005910000.1
NV2g005916000.1
NV2g005917000.1
NV2g005918000.1
NV2g005948000.1
NV2g005949000.1
NV2g005950000.1
NV2g005951000.1
NV2g005952000.1
NV2g005953000.1
NV2g005954000.1
NV2g006008000.1
NV2g006021000.1
NV2g006030000.1
NV2g006031000.1
NV2g006032000.1
NV2g006073000.1
NV2g006102000.1
NV2g006103000.1
NV2g006105000.1
NV2g006109000.1
NV2g006119000.1
NV2g006163000.1
NV2g006295000.1
NV2g006346000.1
NV2g006347000.1
NV2g006355000.1
NV2g006401000.1
NV2g006436000.1
NV2g006439000.1
NV2g006440000.1
NV2g006443000.1
NV2g006479000.1
NV2g006484000.1
NV2g006517000.1
NV2g006709000.1
NV2g006716000.1
NV2g006749000.1
NV2g006767000.1
NV2g006768000.1
NV2g006788000.1
NV2g006994000.1
NV2g007009000.1
NV2g007010000.1
NV2g007030000.1
NV2g007139000.1
NV2g007209000.1
NV2g007273000.1
NV2g007357000.1
NV2g007385000.1
NV2g007568000.1
NV2g007639000.1
NV2g007733000.1
NV2g007788000.1
NV2g008258000.1
NV2g008259000.1
NV2g008261000.1
NV2g008284000.1
NV2g008302000.1
NV2g008324000.1
NV2g008414000.1
NV2g008415000.1
NV2g008421000.1
NV2g008462000.1
NV2g008600000.1
NV2g008625000.1
NV2g008634000.1
NV2g008642000.1
NV2g008659000.1
NV2g008660000.1
NV2g008704000.1
NV2g008737000.1
NV2g008764000.1
NV2g008765000.1
NV2g008777000.1
NV2g008818000.1
NV2g008962000.1
NV2g008974000.1
NV2g008977000.1
NV2g009018000.1
NV2g009069000.1
NV2g009070000.1
NV2g009071000.1
NV2g009078000.1
NV2g009104000.1
NV2g009190000.1
NV2g009200000.1
NV2g009203000.1
NV2g009204000.1
NV2g009497000.1
NV2g009503000.1
NV2g009508000.1
NV2g009511000.1
NV2g009513000.1
NV2g009515000.1
NV2g009538000.1
NV2g009619000.1
NV2g009655000.1
NV2g009672000.1
NV2g009676000.1
NV2g009682000.1
NV2g009727000.1
NV2g009736000.1
NV2g009740000.1
NV2g009741000.1
NV2g009745000.1
NV2g009747000.1
NV2g009810000.1
NV2g009839000.1
NV2g009849000.1
NV2g009862000.1
NV2g009863000.1
NV2g009872000.1
NV2g009873000.1
NV2g009880000.1
NV2g009881000.1
NV2g009885000.1
NV2g009886000.1
NV2g009989000.1
NV2g010004000.1
NV2g010005000.1
NV2g010006000.1
NV2g010042000.1
NV2g010107000.1
NV2g010134000.1
NV2g010151000.1
NV2g010217000.1
NV2g010247000.1
NV2g010264000.1
NV2g010270000.1
NV2g010271000.1
NV2g010282000.1
NV2g010334000.1
NV2g010335000.1
NV2g010338000.1
NV2g010339000.1
NV2g010340000.1
NV2g010341000.1
NV2g010387000.1
NV2g010388000.1
NV2g010390000.1
NV2g010391000.1
NV2g010419000.1
NV2g010432000.1
NV2g010450000.1
NV2g010464000.1
NV2g010465000.1
NV2g010467000.1
NV2g010468000.1
NV2g010470000.1
NV2g010471000.1
NV2g010539000.1
NV2g010559000.1
NV2g010560000.1
NV2g010591000.1
NV2g010615000.1
NV2g010629000.1
NV2g010646000.1
NV2g010686000.1	ncol3
NV2g010696000.1
NV2g010707000.1
NV2g010739000.1
NV2g010782000.1
NV2g010902000.1
NV2g010924000.1
NV2g010952000.1
NV2g010959000.1
NV2g010994000.1
NV2g010995000.1
NV2g010997000.1
NV2g011006000.1
NV2g011025000.1
NV2g011057000.1
NV2g011074000.1
NV2g011077000.1
NV2g011078000.1
NV2g011080000.1
NV2g011286000.1
NV2g011288000.1
NV2g011289000.1
NV2g011297000.1
NV2g011317000.1
NV2g011375000.1
NV2g011395000.1
NV2g011424000.1
NV2g011456000.1
NV2g011584000.1
NV2g011673000.1
NV2g011675000.1
NV2g011720000.1
NV2g011721000.1
NV2g011723000.1
NV2g011724000.1
NV2g011797000.1
NV2g011814000.1
NV2g011816000.1
NV2g011821000.1
NV2g011825000.1
NV2g011829000.1
NV2g011854000.1
NV2g011931000.1
NV2g011971000.1
NV2g011994000.1
NV2g012016000.1
NV2g012134000.1
NV2g012238000.1
NV2g012323000.1
NV2g012363000.1
NV2g012483000.1
NV2g012511000.1
NV2g012529000.1
NV2g012532000.1
NV2g012534000.1
NV2g012535000.1
NV2g012537000.1
NV2g012538000.1
NV2g012539000.1
NV2g012541000.1
NV2g012542000.1
NV2g012554000.1
NV2g012555000.1
NV2g012589000.1
NV2g012616000.1
NV2g012621000.1	Ncol1
NV2g012623000.1	mcol1
NV2g012656000.1
NV2g012671000.1
NV2g012690000.1
NV2g012695000.1
NV2g012782000.1
NV2g012783000.1
NV2g012784000.1
NV2g012788000.1
NV2g012806000.1
NV2g012814000.1
NV2g012875000.1
NV2g012896000.1
NV2g012900000.1
NV2g012907000.1
NV2g012942000.1
NV2g012993000.1
NV2g013045000.1
NV2g013058000.1
NV2g013059000.1
NV2g013194000.1
NV2g013225000.1
NV2g013246000.1
NV2g013261000.1
NV2g013300000.1
NV2g013304000.1
NV2g013345000.1
NV2g013381000.1
NV2g013424000.1
NV2g013439000.1
NV2g013448000.1
NV2g013450000.1
NV2g013500000.1
NV2g013521000.1
NV2g013532000.1
NV2g013584000.1
NV2g013683000.1
NV2g013735000.1
NV2g013798000.1
NV2g013802000.1
NV2g013804000.1
NV2g013897000.1
NV2g013964000.1
NV2g014004000.1
NV2g014005000.1
NV2g014006000.1
NV2g014010000.1
NV2g014011000.1
NV2g014012000.1
NV2g014077000.1
NV2g014187000.1
NV2g014193000.1
NV2g014197000.1
NV2g014230000.1
NV2g014235000.1
NV2g014236000.1
NV2g014320000.1
NV2g014321000.1
NV2g014373000.1
NV2g014440000.1
NV2g014445000.1
NV2g014459000.1	FoxL2
NV2g014549000.1
NV2g014564000.1
NV2g014591000.1
NV2g014593000.1
NV2g014624000.1
NV2g014625000.1
NV2g014626000.1
NV2g014741000.1
NV2g014766000.1
NV2g014847000.1
NV2g015213000.1
NV2g015241000.1
NV2g015251000.1
NV2g015267000.1
NV2g015283000.1
NV2g015546000.1
NV2g015639000.1
NV2g015701000.1
NV2g015706000.1
NV2g015718000.1
NV2g015724000.1
NV2g015725000.1
NV2g015758000.1
NV2g015807000.1
NV2g015808000.1
NV2g015810000.1
NV2g015854000.1
NV2g015872000.1
NV2g015874000.1
NV2g015932000.1
NV2g015933000.1
NV2g016007000.1
NV2g016008000.1
NV2g016021000.1
NV2g016031000.1
NV2g016033000.1
NV2g016097000.1
NV2g016227000.1
NV2g016318000.1
NV2g016333000.1
NV2g016334000.1
NV2g016361000.1
NV2g016382000.1
NV2g016383000.1
NV2g016606000.1
NV2g016632000.1
NV2g016692000.1
NV2g016703000.1
NV2g016877000.1
NV2g016941000.1
NV2g016972000.1
NV2g017001000.1
NV2g017002000.1
NV2g017003000.1
NV2g017020000.1
NV2g017080000.1
NV2g017108000.1
NV2g017109000.1
NV2g017121000.1
NV2g017145000.1
NV2g017169000.1
NV2g017352000.1
NV2g017353000.1
NV2g017370000.1
NV2g017371000.1
NV2g017392000.1
NV2g017394000.1
NV2g017396000.1
NV2g017397000.1
NV2g017398000.1
NV2g017400000.1
NV2g017401000.1
NV2g017402000.1
NV2g017517000.1
NV2g017518000.1
NV2g017558000.1
NV2g017608000.1
NV2g017612000.1
NV2g017614000.1
NV2g017615000.1
NV2g017669000.1
NV2g017723000.1
NV2g017807000.1
NV2g017826000.1
NV2g017827000.1
NV2g017877000.1
NV2g017894000.1
NV2g017968000.1
NV2g018002000.1
NV2g018023000.1
NV2g018052000.1
NV2g018067000.1
NV2g018075000.1
NV2g018076000.1
NV2g018077000.1
NV2g018119000.1
NV2g018175000.1
NV2g018176000.1
NV2g018299000.1
NV2g018307000.1
NV2g018344000.1
NV2g018358000.1
NV2g018394000.1
NV2g018479000.1
NV2g018480000.1
NV2g018482000.1	sox2
NV2g018560000.1
NV2g018584000.1
NV2g018585000.1
NV2g018599000.1
NV2g018609000.1
NV2g018625000.1
NV2g018639000.1
NV2g018751000.1
NV2g018752000.1
NV2g018772000.1
NV2g018783000.1
NV2g018784000.1
NV2g018786000.1
NV2g018792000.1
NV2g018831000.1
NV2g018846000.1
NV2g018856000.1
NV2g018912000.1
NV2g019081000.1
NV2g019110000.1
NV2g019339000.1
NV2g019340000.1
NV2g019366000.1
NV2g019367000.1
NV2g019368000.1
NV2g019509000.1
NV2g019739000.1
NV2g019745000.1
NV2g019753000.1
NV2g019762000.1
NV2g019770000.1
NV2g019779000.1
NV2g019840000.1
NV2g020021000.1
NV2g020023000.1
NV2g020036000.1
NV2g020119000.1
NV2g020208000.1
NV2g020209000.1
NV2g020210000.1
NV2g020240000.1
NV2g020267000.1
NV2g020276000.1
NV2g020321000.1
NV2g020322000.1
NV2g020323000.1
NV2g020460000.1
NV2g020489000.1
NV2g020490000.1
NV2g020492000.1
NV2g020519000.1
NV2g020520000.1
NV2g020521000.1
NV2g020636000.1
NV2g020678000.1
NV2g020737000.1
NV2g020815000.1
NV2g020819000.1
NV2g020837000.1
NV2g020838000.1
NV2g020840000.1
NV2g020849000.1
NV2g020870000.1
NV2g020884000.1
NV2g021053000.1
NV2g021109000.1
NV2g021272000.1
NV2g021273000.1
NV2g021292000.1
NV2g021330000.1
NV2g021461000.1
NV2g021578000.1
NV2g021582000.1
NV2g021600000.1
NV2g021667000.1
NV2g021939000.1
NV2g021976000.1
NV2g021990000.1
NV2g021995000.1
NV2g022004000.1
NV2g022056000.1
NV2g022091000.1
NV2g022104000.1
NV2g022126000.1
NV2g022154000.1
NV2g022155000.1
NV2g022228000.1
NV2g022278000.1
NV2g022291000.1
NV2g022296000.1
NV2g022406000.1
NV2g022446000.1
NV2g022447000.1
NV2g022448000.1
NV2g022451000.1
NV2g022452000.1
NV2g022507000.1
NV2g022546000.1
NV2g022650000.1
NV2g022721000.1
NV2g022722000.1
NV2g022756000.1
NV2g022954000.1
NV2g022956000.1
NV2g023070000.1
NV2g023095000.1
NV2g023129000.1
NV2g023131000.1
NV2g023164000.1
NV2g023185000.1
NV2g023246000.1
NV2g023247000.1	Coup-like1
NV2g023248000.1
NV2g023378000.1
NV2g023379000.1
NV2g023423000.1
NV2g023451000.1
NV2g023471000.1
NV2g023613000.1
NV2g023619000.1
NV2g023627000.1
NV2g023628000.1
NV2g023668000.1
NV2g023839000.1
NV2g023844000.1
NV2g023846000.1
NV2g023901000.1
NV2g023902000.1
NV2g023907000.1
NV2g023986000.1
NV2g024302000.1
NV2g024332000.1
NV2g024334000.1
NV2g024348000.1
NV2g024349000.1
NV2g024354000.1
NV2g024356000.1
NV2g024357000.1
NV2g024359000.1
NV2g024360000.1
NV2g024362000.1
NV2g024375000.1
NV2g024424000.1
NV2g024489000.1
NV2g024508000.1
NV2g024533000.1
NV2g024561000.1
NV2g024598000.1
NV2g024630000.1
NV2g024631000.1
NV2g024774000.1
NV2g024811000.1
NV2g024826000.1
NV2g024850000.1
NV2g024893000.1
NV2g024894000.1
NV2g024951000.1
NV2g024990000.1
NV2g024993000.1
NV2g025130000.1
NV2g025253000.1
NV2g025254000.1
NV2g025327000.1
NV2g025337000.1
NV2g025338000.1
NV2g025428000.1
NV2g025537000.1
NV2g025612000.1
NV2g025694000.1
NV2g025696000.1
NV2g025707000.1
NV2g025714000.1
NV2g025947000.1

## Sheet: paxA_inhibit_znf845
Nv_protein_ID
NV2g001877000.1
NV2g002763000.1
NV2g002780000.1
NV2g003876000.1
NV2g004006000.1
NV2g005321000.1
NV2g006485000.1
NV2g008359000.1
NV2g008601000.1
NV2g009504000.1
NV2g009744000.1
NV2g010316000.1
NV2g010557000.1
NV2g011608000.1
NV2g011802000.1
NV2g011823000.1
NV2g011826000.1
NV2g011827000.1
NV2g012200000.1
NV2g012499000.1
NV2g012500000.1
NV2g012689000.1
NV2g012691000.1
NV2g013057000.1
NV2g013702000.1
NV2g014106000.1
NV2g014815000.1
NV2g014846000.1
NV2g016903000.1
NV2g017239000.1
NV2g018306000.1
NV2g018817000.1
NV2g019216000.1
NV2g019432000.1
NV2g019556000.1
NV2g019727000.1
NV2g020428000.1
NV2g020429000.1
NV2g020795000.1
NV2g021271000.1
NV2g022131000.1
NV2g023122000.1
NV2g024361000.1
NV2g024738000.1

## Sheet: znf845_paxA
Nv_protein_ID
NV2g000918000.1
NV2g001044000.1
NV2g001420000.1
NV2g001762000.1
NV2g001924000.1
NV2g001925000.1	GGt
NV2g002801000.1
NV2g003157000.1
NV2g003261000.1
NV2g003342000.1
NV2g003648000.1
NV2g003676000.1
NV2g003951000.1
NV2g004020000.1
NV2g004448000.1
NV2g004791000.1
NV2g004792000.1
NV2g004963000.1
NV2g005160000.1
NV2g006022000.1
NV2g006104000.1
NV2g006106000.1
NV2g006107000.1
NV2g006117000.1
NV2g006259000.1
NV2g006441000.1
NV2g006444000.1
NV2g006480000.1
NV2g006685000.1
NV2g006786000.1
NV2g006950000.1
NV2g007011000.1
NV2g007208000.1
NV2g007975000.1
NV2g008412000.1
NV2g008413000.1
NV2g008633000.1
NV2g008635000.1
NV2g008766000.1
NV2g009649000.1
NV2g009650000.1
NV2g009737000.1
NV2g009738000.1
NV2g009748000.1
NV2g009990000.1
NV2g010077000.1
NV2g010139000.1
NV2g010141000.1
NV2g010196000.1
NV2g010248000.1
NV2g010343000.1
NV2g010344000.1
NV2g010349000.1
NV2g010601000.1
NV2g010671000.1
NV2g010892000.1
NV2g011075000.1
NV2g011117000.1
NV2g011665000.1
NV2g011801000.1	ncol4
NV2g011819000.1
NV2g011824000.1
NV2g012143000.1
NV2g012144000.1
NV2g012315000.1
NV2g012533000.1
NV2g012536000.1
NV2g012540000.1
NV2g012552000.1
NV2g012573000.1
NV2g012871000.1
NV2g013435000.1
NV2g013586000.1
NV2g013928000.1
NV2g015444000.1
NV2g015737000.1
NV2g015738000.1
NV2g015739000.1
NV2g015883000.1
NV2g016329000.1
NV2g016479000.1
NV2g016480000.1
NV2g016526000.1
NV2g016528000.1
NV2g016529000.1
NV2g016585000.1
NV2g017054000.1
NV2g017120000.1
NV2g017391000.1
NV2g017399000.1
NV2g017403000.1
NV2g017408000.1
NV2g017626000.1
NV2g017756000.1
NV2g018311000.1
NV2g018366000.1
NV2g018488000.1
NV2g018533000.1
NV2g018597000.1
NV2g018626000.1
NV2g018850000.1
NV2g018915000.1
NV2g019508000.1
NV2g020270000.1
NV2g020839000.1
NV2g020952000.1
NV2g021183000.1
NV2g021576000.1
NV2g021577000.1
NV2g022740000.1
NV2g023081000.1
NV2g023629000.1
NV2g023791000.1
NV2g024161000.1
NV2g025010000.1
NV2g025184000.1
NV2g025360000.1
NV2g025743000.1

## Sheet: znf845_foxE_like
Nv_protein_ID
NV2g000675000.1
NV2g000676000.1
NV2g000949000.1
NV2g001257000.1
NV2g001335000.1
NV2g002533000.1
NV2g002743000.1
NV2g003011000.1
NV2g003135000.1
NV2g003485000.1
NV2g004218000.1
NV2g004676000.1
NV2g004774000.1
NV2g005169000.1
NV2g005188000.1
NV2g005190000.1
NV2g005192000.1
NV2g005194000.1
NV2g005319000.1
NV2g006072000.1
NV2g006161000.1
NV2g006162000.1
NV2g006437000.1
NV2g006826000.1
NV2g007012000.1
NV2g007167000.1
NV2g007843000.1
NV2g008353000.1
NV2g008776000.1
NV2g009120000.1
NV2g009507000.1
NV2g009510000.1
NV2g009534000.1
NV2g009746000.1
NV2g010528000.1
NV2g010897000.1
NV2g010953000.1
NV2g011056000.1
NV2g011394000.1
NV2g011718000.1
NV2g011725000.1
NV2g011815000.1
NV2g011820000.1
NV2g012063000.1
NV2g012442000.1
NV2g012622000.1
NV2g012708000.1
NV2g012897000.1
NV2g013049000.1
NV2g013095000.1
NV2g013801000.1
NV2g013830000.1
NV2g014428000.1
NV2g014511000.1
NV2g014941000.1
NV2g015638000.1
NV2g015888000.1
NV2g016362000.1
NV2g016646000.1
NV2g016993000.1
NV2g017000000.1
NV2g017806000.1
NV2g018174000.1
NV2g018310000.1
NV2g018954000.1
NV2g019341000.1
NV2g019758000.1
NV2g020325000.1
NV2g020419000.1
NV2g021537000.1
NV2g022454000.1
NV2g022490000.1
NV2g023584000.1
NV2g023951000.1
NV2g024032000.1
NV2g024307000.1
NV2g024308000.1
NV2g024309000.1
NV2g024342000.1
NV2g024358000.1
NV2g024363000.1
NV2g024666000.1
NV2g024780000.1
NV2g024908000.1
NV2g025228000.1
NV2g025410000.1

## Sheet: znf845_paxA_foxE_like
Nv_protein_ID
NV2g000119000.1
NV2g001841000.1
NV2g003341000.1
NV2g004793000.1
NV2g005187000.1
NV2g005189000.1
NV2g005232000.1
NV2g005798000.1
NV2g006438000.1
NV2g006698000.1
NV2g007755000.1
NV2g008976000.1
NV2g010332000.1
NV2g010927000.1
NV2g011028000.1
NV2g011163000.1
NV2g011233000.1
NV2g011859000.1
NV2g012553000.1
NV2g015937000.1
NV2g016328000.1
NV2g016360000.1
NV2g017017000.1
NV2g017607000.1
NV2g017887000.1
NV2g018406000.1
NV2g020491000.1	Nep3-like
NV2g023281000.1
NV2g025695000.1

## Sheet: foxE_like
Nv_protein_ID
NV2g001183000.1
NV2g001448000.1
NV2g001824000.1
NV2g003409000.1
NV2g004530000.1
NV2g005358000.1
NV2g006240000.1
NV2g006405000.1
NV2g006615000.1
NV2g009823000.1
NV2g010307000.1
NV2g010358000.1
NV2g012709000.1
NV2g013307000.1
NV2g014340000.1
NV2g014570000.1
NV2g014631000.1
NV2g015027000.1	SoxA
NV2g015362000.1
NV2g016568000.1
NV2g017351000.1
NV2g018171000.1
NV2g018430000.1
NV2g018535000.1
NV2g019689000.1
NV2g019749000.1	cnido-fos1
NV2g020770000.1
NV2g021413000.1
NV2g022835000.1
NV2g022943000.1
NV2g025991000.1
