# Supplementary material for: Lineage-specific elaboration of a conserved cnidogenic program drives cnidocyte diversification and illuminates cell type evolution
Source: Research Square preprint supplement (doi:10.21203/rs.3.rs-10009230/v1), 2026-06-30
Supplement: Supplementary file 4 [file 7305442cbb906106c4648bfd.xlsx]

## Sheet: ISH probe primers
Nv2 ID / gene name	NVE ID	Forwar primer	Reverse primer
NV2g020884000.1	NVE19551	GCGACATGTCTGCATCAAGG	GGAGACCGCTGTAATTCTGAG
NV2g011163000.1	NVE19577	CAGGCAAGGGAAAGCACTGC	GTGCAGCAAGGTTTATTGCAAC
NV2g024308000.1	NVE15733	GACCTAACTTTCCACTATCTGC	GCGACAGCAAGTGGTTCTTC
NV2g012897000.1	NVE16876	CGAGCCAAGTTTTGAGGTGACAC	GGATGACGCGATTCTATTGCG
NV2g018310000.1	NVE4965	CTTAGTGACTTAACTACTCTAGC	GAATCTCCGCCGTCCTCATCTTC
NV2g024780000.1	NVE18169	CTTGATACGCGCAATAAATACC	GTCTTTCATCTACCCTTACACG
soxC
soxB2		CAAGCAAGAAGACGGGCATG	AGCAATACCGGTACGTAAGC
foxE-like		ATGGTCGAGACATCTACTAA	TCAGCAAATGTCGCAGCTAC
paxA	Babonis et al (https://link.springer.com/article/10.1186/s13227-017-0077-7)

## Sheet: QPCR primers
Gene name / ID		Forward primer	Reverse primer
foxE-like		TTACCCCGAGAATGGCTTTGGAG	CCATCGCACTCGCTTGAAAAGGAC
soxB2		GCAAGTGGAGGATAGCAGAGG	CGGAGCTCGAGTACGCTTTAG
sox2		GGGGAGATGCCAGGGATAGGTATG	AGTGCGGGGAGAAATGGTAGG
coup-like2		CTGCGTTCTCGTTGGTGTGAGATG	CCACCTCATAAGCAAGCGGCTTGC
coup-like1		CATCAACCAGCCACGCCAAGTC	TGAGGAGAAGTTTGCCGAATCGC
tailless		CGCCATCATCACCTCCATATCACG	CGGTCGGTCTTCTTTGTTCAAGTCC
paxA		GGGTCCAAACGATGCAGTTCACTC	GTGTATCAAGGGCGGACATTGAGG
dkk-like3		TGAGAAGACTTCCAAGGGTGATCC	TTACCGTGGGCTCAAGAACACAGC
NV2g006826000.1	NVE7630	ATTCCGCACTATGCCAGTCACG	ATGCGTGCCCATACAAGTTTGC
NV2g012897000.1	NVE16876 cnido jun	CGGAATCATCTACCCGGTAACA	GTCCCTAAAATCTAATGTAG
NV2g022943000.1	NVE15578,NVE1605	GCGTATCATCCTCATGGTAGTC	GATCTCGTTCTCCACCCATTC
NV2g015027000.1	NVE426	CATGTACCACTGACTCTCGTTC	TGAGCGCATTGTCCGTAAA
NV2g018430000.1	NVE2055	CAATGTVVTACTCGGTCGTT	GGACTGGAAGAGCGATCATAAG
NV2g010358000.1	NVE24279	GGTCCGTTCAATCGGTCAATA	TCATCGATACTCGCGGTAGA
NV2g005358000.1	NVE13685	CGCTGTGTTTGCTGACTTAC	GGTGGTTCACCTTGCATTTC
NV2g006615000.1	NVE5995	CGTGACCTTCACGTGGATTAG	CCTGCCCAAATATGGCTATGA

## Sheet: shRNA primers
Gene/ primer name
foxE-like 169	Forward primer	TAATACGACTCACTCACTATAGACAAGAGGCGTACACTCATTCAAAGATGAGTGTACGCCTCTTGTCTT
	Reverse primer	AAGACAAGAGGCGTACACTCATCTCTCTTGAATGAGTGTACGCCTCTTGTCTATAGTGAGTCGTATTA
foxE-like 254	Forward primer	TAATACGACTCACTCACTATAGGCAGAATTCCATCAGACATTCAAGAGATGTCTGATGGAATTCTGCCTT
	Reverse primer	AAGGCAGAATTCCATCAGACATCTCTTGAATGTCTGATCGAATTCTGCCTATAGTGAGTCGTATTA
paxA	Forward primer	TAATACGACTCACTATAGATGCGTCAGTAAGATCCTTTCAAGAGAAGGATCTTACTGACGCATCTT
	Reverse primer	AAGATGCGTCAGTAAGATCCTTCTCTTGAAAGGATCTTACTGACGCATCTATAGTGAGTCGTATTA
znf845		Babonis et al (www.pnas.org/doi/10.1073/pnas.2113701119)
soxC	Forward primer	TAATACGACTCACTATAGGGTGCACAAATGGGTAGTTTTCAAGAGAGAAACTACCCATTTGTGCACCTT
	Reverse primer	AAGGTGCACAAATGGGTAGTTTCTCTTGAAAACTACCCATTTGTGCACCTATAGTGAGTCGTATTA
soxB2	Forward primer	TAATACGACTCACTATAGAGGATAGCAGAGGTATGATTCAAGAGATCATACCTCTGCTATCCTCTT
	Reverse primer	AAGAGGATAGCAGAGGTATGATCTCTTGAATCATACCTCTGCTATCCTCTATAGTGAGTCGTATTA

## Sheet: Transgenic reporter
Gene name	Forward primer	Reverse primer
foxE-like	ttaattaaGATAGCACACGTCTTGAAGTTG	ggcgcgccTTTTTAAGAACACCCCAGACTTC
