# Supplementary material for: Lineage-specific elaboration of a conserved cnidogenic program drives cnidocyte diversification and illuminates cell type evolution
Source: Research Square preprint supplement (doi:10.21203/rs.3.rs-10009230/v1), 2026-06-30
Supplement: Supplementary file 5 [file f1ba2693d7983ce515d80dda.xlsx]

## Sheet: foxE_like
...1

## Sheet: paxA
Gene ID

## Sheet: znf845
Notes
