# Supplementary figures and images for: Lineage-specific elaboration of a conserved cnidogenic program drives cnidocyte diversification and illuminates cell type evolution
Source: Research Square preprint supplement (doi:10.21203/rs.3.rs-10009230/v1), 2026-06-30

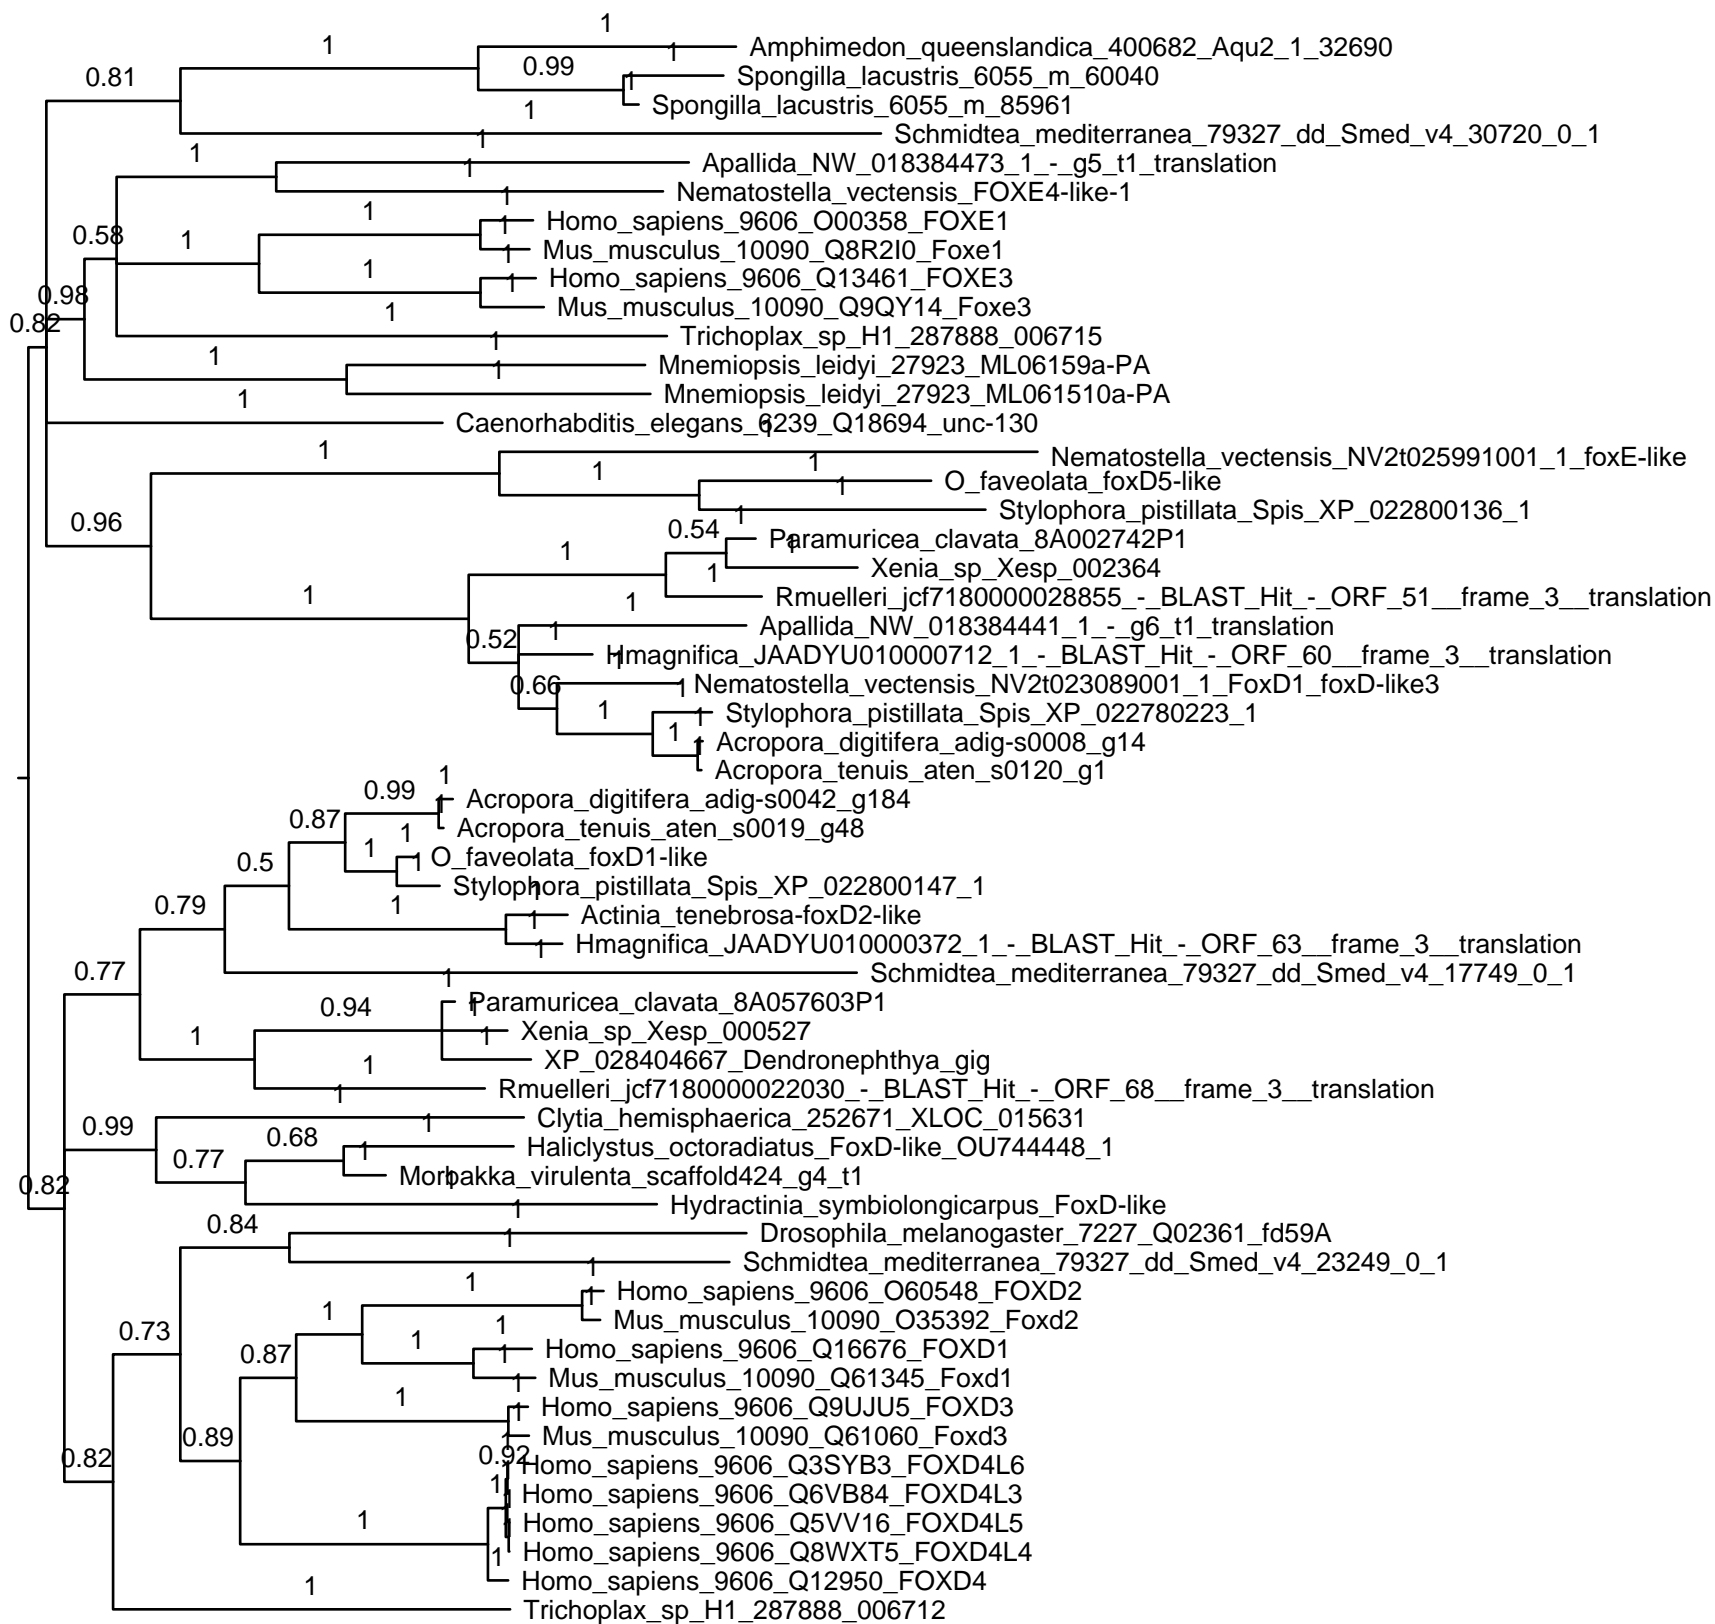

2.0

Supplement: Supplementary file 1 [file 868dcc8287e0271c1eebf0c9.pdf]

Tree scale: 1

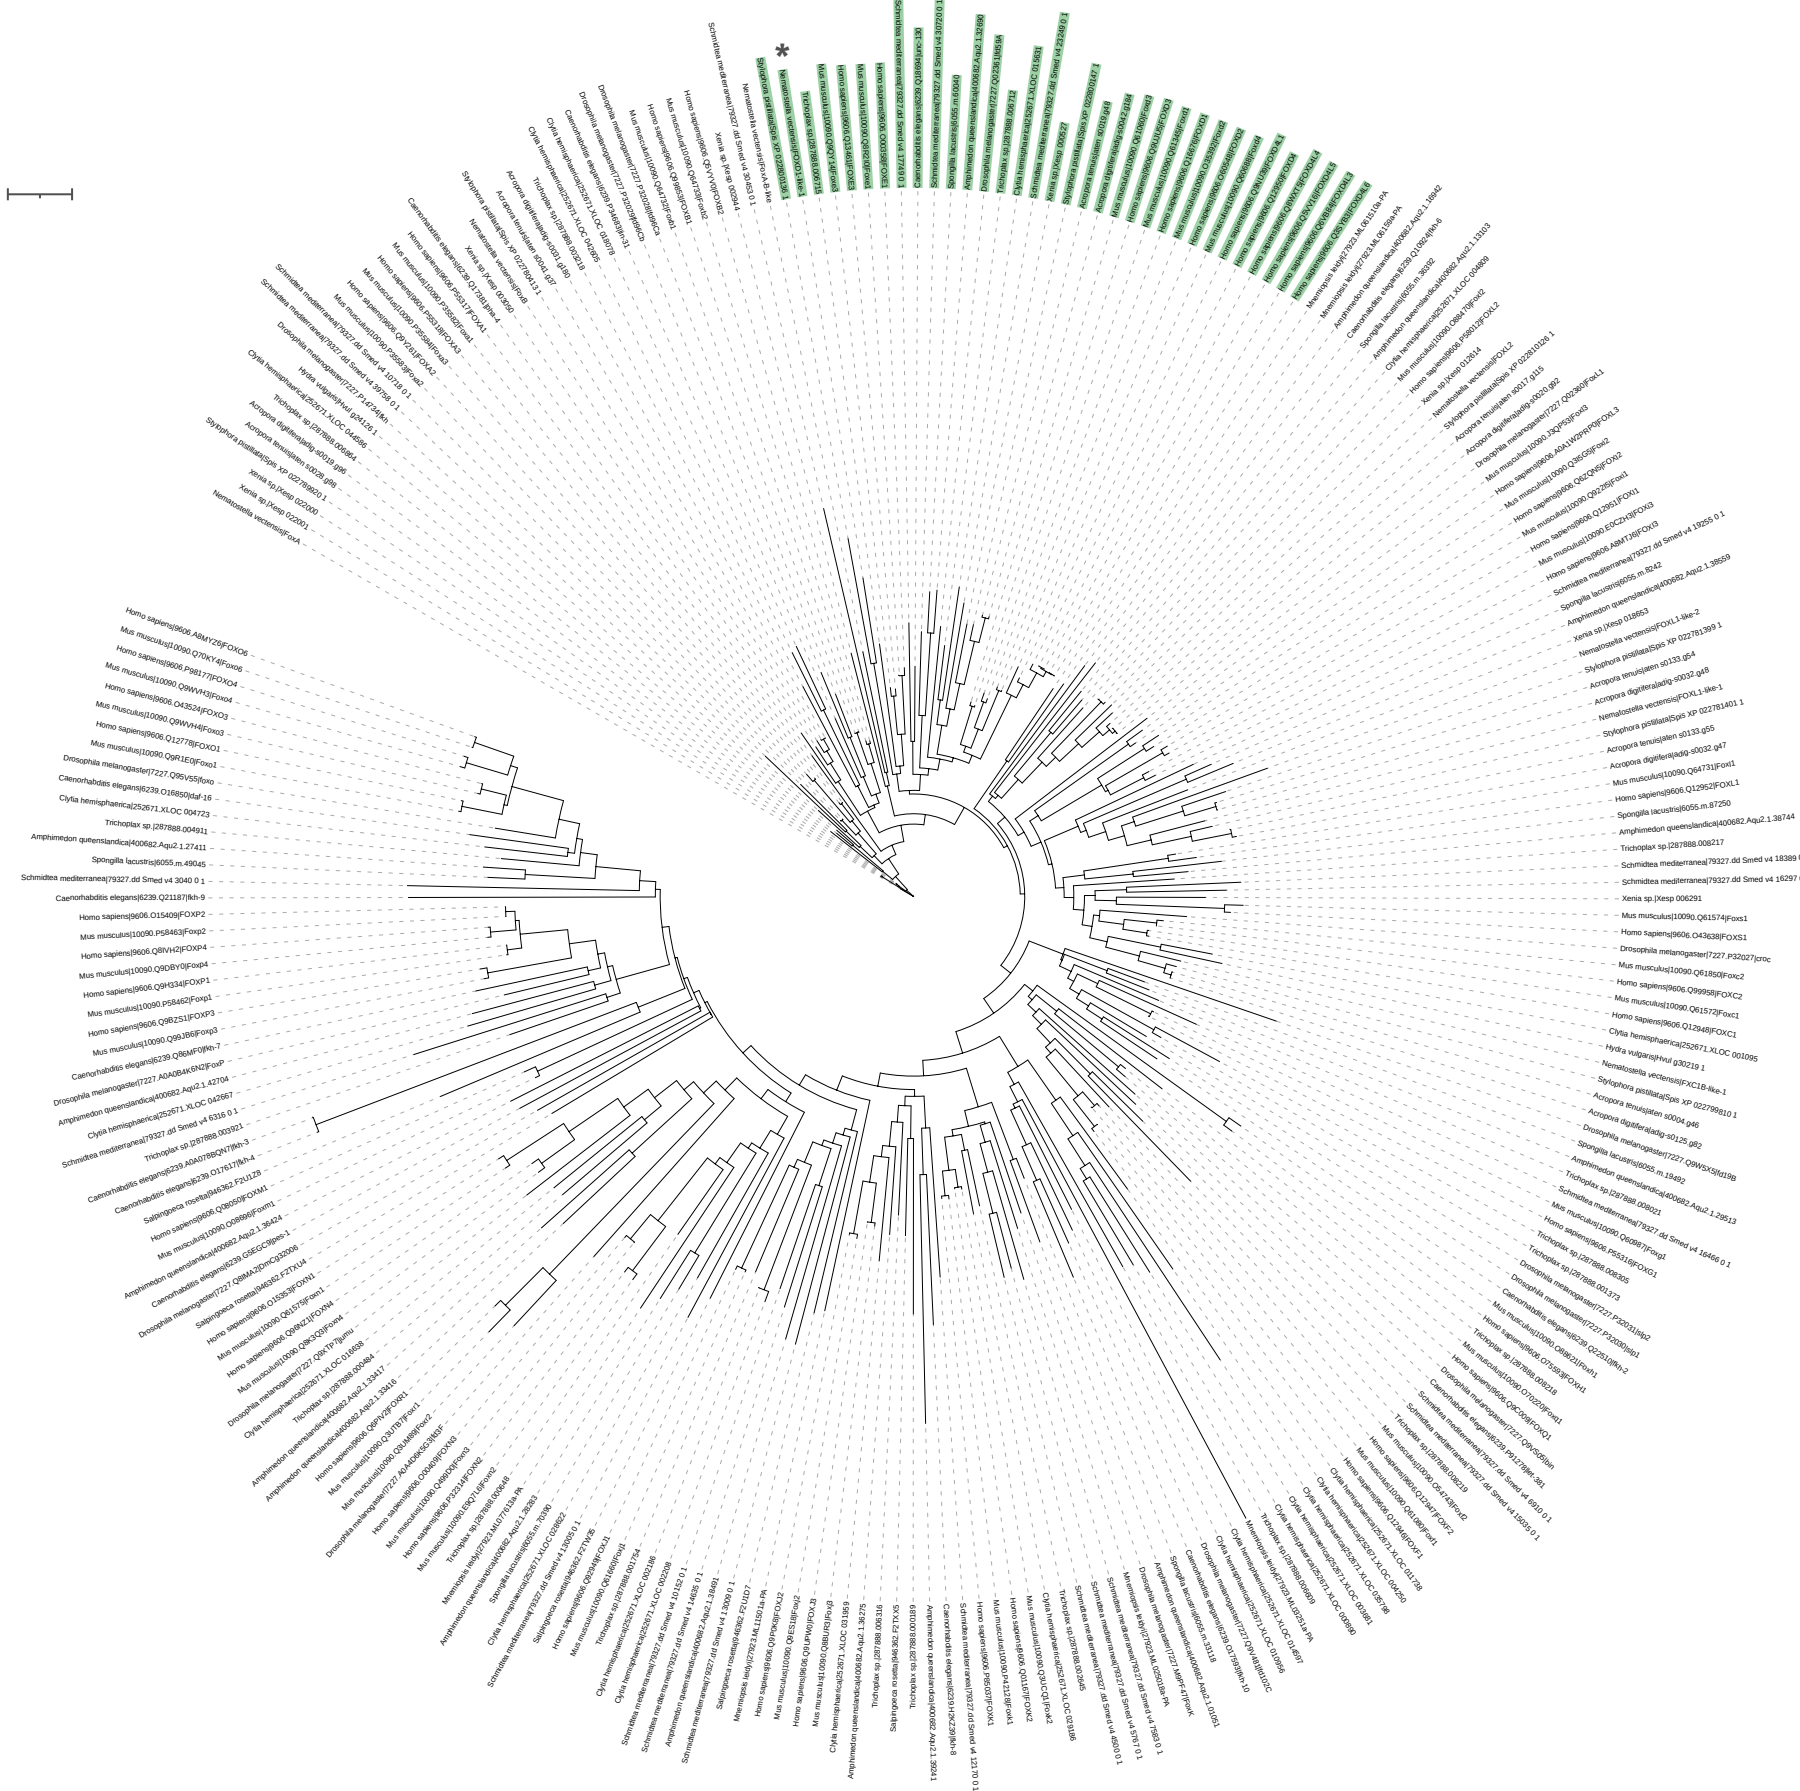

Supplement: Supplementary file 2 [file d180aa3100bb9e7d7df75e88.pdf]
